1 **Host genomic influence on bacterial composition in the switchgrass rhizosphere**

2 Jeremy Sutherland [1,2], Terrence Bell [1,2,3], Ryan V. Trexler [3,4], John E. Carlson [2,4], Jesse R. Lasky [5]\*

3 1 – Department of Plant Pathology and Environmental Microbiology, The Pennsylvania State University, University

4 Park, PA, USA

5 2 – Intercollege Graduate Degree Program in Bioinformatics and Genomics, The Pennsylvania State University,

6 University Park, PA, USA

7 3 – Intercollege Graduate Degree Program in Ecology, The Pennsylvania State University, University Park, PA,

8 USA

9 4 – Department of Ecosystem Science and Management, The Pennsylvania State University, University Park, PA,

10 USA

11 5 – Department of Biology, The Pennsylvania State University, University Park, PA, USA

12

13

14 \*Corresponding author contact: 1-814-863-5318; jrl35@psu.edu

15

16

17

18

19

20

21

22

23

24

25

26

27

28 **Keywords:** switchgrass, rhizosphere, microbiome, host genomic influence, heritability

29

## 30 **Abstract**

31 Host genetic variation can shape the diversity and composition of associated microbiomes, which may reciprocally  
32 influence host traits and performance. While the genetic basis of phenotypic diversity of plant populations in nature  
33 has been studied, comparatively little research has investigated the genetics of host effects on their associated  
34 microbiomes. Switchgrass (*Panicum virgatum*) is a highly outcrossing, perennial, grass species with substantial  
35 locally adaptive diversity across its native North American range. Here, we compared 383 switchgrass accessions in  
36 a common garden to determine the host genotypic influence on rhizosphere bacterial composition. We hypothesized  
37 that the composition and diversity of rhizosphere bacterial assemblages would differentiate due to genotypic  
38 differences between hosts (potentially due to root phenotypes and associated life history variation). We observed  
39 higher alpha diversity of bacteria associated with upland ecotypes and tetraploids, compared to lowland ecotypes  
40 and octoploids, respectively. Alpha diversity correlated negatively with flowering time and plant height, indicating  
41 that bacterial composition varies along switchgrass life history axes. Narrow-sense heritability ( $h^2$ ) of the relative  
42 abundance of twenty-one core bacterial families was observed. Overall compositional differences among tetraploids,  
43 due to genetic variation, supports wide-spread genotypic influence on the rhizosphere microbiome. Lastly, a  
44 genome-wide association study identified 1,861 single-nucleotide polymorphisms associated with 110 families and  
45 genes containing them related to potential regulatory functions. Our findings suggest that switchgrass genomic and  
46 life-history variation influences bacterial composition in the rhizosphere, potentially due to host adaptation to local  
47 environments.

48

## 49 **Introduction**

50 Macroscopic organisms host diverse microbiomes, which often differ substantially among individuals  
51 (Smith et al., 2015; Trivedi et al., 2020; Wilson et al., 2020). Some of the proximate causes of this variation in  
52 microbiome composition arise from differences between host environments and traits, the latter of which can be  
53 divided into genetic and plastic components. Host genetic differences can affect a wide range of traits that influence  
54 associated microbiome composition, including traits that determine the supply of resources used by microbes or  
55 traits that control environmental variables affecting microbial fitness in other ways (e.g. pH) (Lebeis et al., 2015;  
56 Sasse et al., 2018). These host genetic influences on microbiomes may arise from different evolutionary processes.

57 For example, host traits that affect microbiome composition may evolve neutrally or in response to non-microbial  
58 components of the local environment (Zeng et al., 2015). Alternatively, host trait variation could have evolved as a  
59 direct response to beneficial interactions with microbes in the environment (Gould et al., 2018). In the latter case,  
60 hosts could either influence the abundance of microbes that are simply present in the environment, and functionally  
61 important to the host, or hosts could form species or strain-specific symbiotic relationships where the host depends  
62 on and influences the abundance of those taxa for reproductive success (Parker et al., 2006).

63 Because of environmental and dispersal limitations, the same microbes may not be present across the entire  
64 range of a host, although functionally similar ones might be. It has been shown that reciprocal interactions between  
65 host immune systems and host-associated microorganisms can lead to preferential recruitment of beneficial  
66 microbial types and repel pathogenic types, to varying degrees (Hacquard et al., 2017; Jones et al., 2019). This  
67 suggests that hosts might (directly or indirectly) select for functional microbial traits from certain lineages. Several  
68 studies have observed the presence of ‘core microbiota’ – persistent members of the microbiome that appear across a  
69 large portion of a host’s population or species (Risely, 2020), but it is often unclear whether these microorganisms  
70 are functionally important or commensal to the host. Yet, because microbial traits are often phylogenetically  
71 conserved and host selection of microbes can occur in related microbial lineages (Lemanceau et al., 2017; Martiny et  
72 al., 2015), a core microbiome might be preserved for higher taxonomic levels but undetectable for lower ones, at the  
73 same occupancy frequency threshold. The study of diverse host genotypes and phenotypes in common environments  
74 could reveal the genetic and host physiological drivers of variation in associated microbiomes and, potentially, types  
75 of microbes that are functionally important to the host.

76 The demonstrated influence of host trait variation on microbial assemblages (Hestrin et al., 2021; Jones et  
77 al., 2019; Wagner et al., 2016) suggests that microbiome composition can be treated as an extension of host  
78 phenotype, one that may be under selective pressure by both the host and the environment (Bordenstein & Theis,  
79 2015; Hunter, 2018; Moran & Sloan, 2015; Wagner et al., 2016; Whitham et al., 2003). Genome-wide association  
80 studies (GWAS) have shown that the relationship between hosts and specific microbial taxa can be linked to single-  
81 nucleotide polymorphisms (SNPs) (Beilsmith et al., 2019). However, at the microbiome level, it becomes  
82 challenging to directly link host genotype and microbial composition, due to the high diversity and dimensionality of  
83 microbiomes (Wray et al., 2013). Common garden experiments and genetic mapping offer a window into host

84 genetic impacts on host-associated microbial composition. The resolution of association mapping can be improved  
85 by exploiting high levels of genomic diversity within and between populations (Holland, 2007).

86 Switchgrass (*Panicum virgatum*) is a C4 perennial grass species that has been extensively studied as a  
87 bioenergy crop since 2005 (Bouton, 2007; McLaughlin & Kszos, 2005; Parrish & Fike, 2005; Sanderson et al.,  
88 2006). Unlike first generation biofuels, switchgrass can be grown on marginal land with minimal inputs while also  
89 providing ecological services (e.g. wildlife habitat and soil erosion mitigation) (Werling et al., 2014). In addition to  
90 its ecological and agricultural value, switchgrass provides an ideal system for studying the influence of host  
91 genotypic diversity on rhizosphere bacterial composition (i.e., bacteria living on or in close proximity to the root  
92 system of the plant) because of the high degree of genotypic diversity in the species.

93 Switchgrass is primarily an outcrossing species with high genetic diversity within populations, showing  
94 evidence of inbreeding depression, which increases heterozygosity in the genome (Sharma et al., 2012). The species  
95 is comprised of two locally-adapted ecotypes, upland and lowland, based on differences in phenotype, physiology,  
96 and habitat (Das et al., 2004). Separate migration events fostered by interglacial periods, in addition to gene  
97 duplication through polyploidization, have also played a major role in shaping the genomic diversity of switchgrass  
98 (Casler et al., 2015). Lowland switchgrass is primarily allotetraploid (4X:  $n = 36$ ) and exhibits disomic inheritance  
99 – chromosome inheritance that follows diploid association patterns. Upland accessions tend to vary in their ploidy  
100 level (4X:  $n = 36$ , 6X:  $n = 54$ , 8X:  $n = 72$ ) and exhibit widespread aneuploidy between and within localized  
101 populations (Costich et al., 2010). Additionally, populations of switchgrass are adapted to local climate conditions  
102 and linkage mapping suggests a polygenic basis to this local adaptation (Lowry et al., 2019). Here, we studied  
103 genotypes largely from the geographically Northeastern, upper Southern, and Midwestern United States that can be  
104 genetically clustered into five groups (roughly North, South, East, West, and Northeast, with some geographic  
105 overlap) (Supplemental Figure 1) (Lu et al., 2013). Genetic variation in switchgrass has been linked to measures of  
106 plant fitness and performance, including biomass production (Lowry et al., 2019) and soil carbon inputs (Adkins et  
107 al., 2016; Stewart et al., 2017). While substantial research has explored the switchgrass microbiome, key gaps  
108 remain, including the functional role of non-fungal microorganisms and host mechanisms that underly switchgrass–  
109 microbiome interactions (Hestrin et al., 2021).

110 Vascular plants influence microbes in the rhizosphere through rhizodeposits (Dennis et al., 2010) and  
111 carbon-based root exudates (Compant et al., 2010; Hu et al., 2018; Yu & Hochholdinger, 2018). Root exudates

112 provide signaling and substrate compounds for beneficial microbial recruitment (Carvalhais et al., 2013;  
113 Lakshmanan et al., 2012), and antibiotic compounds that defensively modulate the microbiome composition against  
114 pathogenic taxa (Baetz & Martinoia, 2014; Lebeis et al., 2015). When available, root exudates potentially represent  
115 a larger portion of carbon in the soil compared to other carbon inputs from the environment (e.g. leaf litter)  
116 (Heijboer et al., 2018). Switchgrass can benefit from a range of microbes that are influenced by root exudates  
117 (Hestrin et al., 2021).

118         In this study, we analyzed bacterial 16S rRNA gene sequences from total DNA extracted from rhizosphere  
119 soil samples for 383 switchgrass accessions from 63 local populations planted within a common garden in Ithaca,  
120 NY, USA. Our aim was to better understand the influence of switchgrass genotype on the composition of bacteria in  
121 the rhizosphere. We hypothesized that overall bacterial composition and diversity within the growing site would  
122 differentiate due to host genetic variation along the three dimensions of switchgrass genetic diversity (ecotype,  
123 ploidy level, and genetic cluster), as is true for multiple fitness-related traits (Lovell et al., 2021). Separately,  
124 bacteria experience higher rates of gene loss, horizontal gene transfer, and shorter generation times compared to  
125 their hosts. So, microbial specialization on a given host can be evolutionarily fast compared to changes in the plant  
126 community (Bever et al., 2012). Given that the evolutionary response rate is mismatched between switchgrass  
127 genotypes and their microbiomes, we sought to determine the lowest taxonomic level for which a potential host  
128 influence could be detected. We show that switchgrass genotype influences bacteria in the rhizosphere at, at least,  
129 the family level. Our findings demonstrate how plant host genotype can influence host-associated microbiomes, the  
130 taxonomic level at which the microbiome is influenced, and the host genetic architecture involved.

131

## 132 **Materials and Methods**

### 133 **Switchgrass Germplasm Data**

134         Previously, exome capture sequencing was used to characterize variation in the genic regions of the  
135 genome from the Northern Switchgrass Association Panel used in this study ( $n = 537$ ) (Evans et al., 2018). For this  
136 study, the HapMapv2 matrix was obtained from the Dryad Digital Repository (10.5061/dryad.mp6cp) in 2019.  
137 Several modifications were made to the original dataset. The dataset was modified in *python* (G. Van Rossum &  
138 Drake, 2009) to reflect heterozygote positions more conservatively than the original, unfiltered, dataset, such that  
139 heterozygote positions with read count ratios greater than 0.75 or less than 0.25 were called homozygous relative to

140 the appropriate allele (e.g. A(20)/T(1) = A). SNPs with a minor-allele frequency (MAF) below 0.05 were excluded,  
141 resulting in 103,776 SNPs for all genotypes studied here ( $n = 362$ ) spanning eighteen chromosomes: Chr01- 09  
142 (subgenomes a and b) of the v1.1 *P. virgatum* reference genome ([www.phytozome.net](http://www.phytozome.net)) and fifteen unanchored  
143 scaffolds (Evans et al., 2018). The unanchored scaffolds of Evans et al. (2018) were renamed to the corresponding  
144 contig names within the v1.1 reference genome using *python*. Phylogenetic tree generated in Tassel v5 (Bradbury et  
145 al., 2007).

146 We compared bacterial composition to published data on several important switchgrass functional and life  
147 history traits, using data from 2009, 2010, and 2011 field seasons at the common garden in Ithaca, NY (genetic  
148 variation in these traits is largely consistent from year to year) (Lipka et al., 2014). The 2011 measurements for  
149 anthesis date and full plant height were used to identify correlations with rhizosphere alpha diversity present in  
150 2016.

151

## 152 **Rhizosphere sampling of switchgrass accessions**

153 The original switchgrass association panel consisted of 3-10 clonally propagated individuals each from 66  
154 discrete switchgrass local populations grown from seed in the greenhouse of the USDA-ARS Dairy Forage Research  
155 Center in Madison WI in 2007 (Lu et al., 2013). The accessions were sourced from much of the natural range of  
156 switchgrass in the eastern and midwestern United States. Young plants were deposited in the common garden in  
157 Ithaca, NY, USA in 2008. In 2016, plugs were collected for transplanting from 525 cloned accessions, representing  
158 all but two (perished) original populations. Prior to replanting the plugs, soil samples were collected into a  
159 polythene bag from each of the switchgrass accessions by vigorously shaking off soil attached to the roots. The bags  
160 with soil and fine roots were initially stored at 4°C while being processed - each soil sample was thoroughly mixed  
161 into a uniform distribution and then transferred to 50 ml conical cryogenic tubes and stored at -80°C prior to soil  
162 DNA extraction.

163

## 164 **Soil DNA extractions**

165 To determine the composition of bacteria established in the switchgrass rhizosphere, we selected soil  
166 samples from 383 of the 525 cloned switchgrass accessions, based on a phylogenetically determined set of clones  
167 from 63 of the local populations in the association panel. Total DNA was extracted from ~300 mg of soil using the

168 NucleoSpin Soil 96 kit (Macherey-Nagel, Düren, Germany). Lysis was performed using the Buffer SL with  
169 Enhancer SX, and was performed on the FastPrep 24 homogenizer (MP Biomedicals, Santa Ana, CA, USA) at 4.0  
170 m/s for 30 s.

171

## 172 **Amplicon Sequencing**

173 Briefly, amplicons targeting the V3-V4 region of the 16S rRNA gene were generated from all 383 samples  
174 using universal bacterial primers 515F (5'-GTGYCAGCMGCCGCGGTAA-3') and 806R (5'-  
175 GGACTACNVGGGTWTCTAAT-3') (Apprill, McNally, Parsons, & Weber, 2015; Parada, Needham, & Fuhrman,  
176 2016) with overhangs for attaching barcodes and standard Illumina overhang adaptors in a second PCR step (full  
177 protocol outlined in the supplemental methods of Trexler & Bell (2019)). Sequencing was performed on an Illumina  
178 MiSeq using the 2 × 250 cycle v2 kit. Raw reads are available through NCBI SRA under project number  
179 PRJNA689762.

180

## 181 **Amplicon sequence analysis pipeline**

182 The raw 16S rRNA gene sequences were analyzed using an adapted version of the *dada2* pipeline  
183 (Callahan et al., 2016). *dada2* was used to process the raw sequences into Amplicon Sequence Variants (ASVs).  
184 Reads were truncated above 240 bp and below 160 bp. Sequences with any missing reads after truncation were  
185 discarded. Reads were then truncated at the first instance of a quality score less than 2. After truncation, reads that  
186 matched against the phiX Genome were discarded. Reads with higher than two "expected errors" were also  
187 discarded. Expected errors are calculated from the nominal definition of the quality score:  $EE = \sum(10^{-(Q/10)})$ .  
188 Filtered sequences were used to determine the error rate using the *dada2* function: `learnErrors()`. The filtered  
189 sequences were then processed with the core sample inference algorithm, `dada()`, incorporating the learned error  
190 rates. Forward and reverse sequence reads were then merged. A sequence table was made and chimeras were  
191 removed using the "consensus" method. Taxonomic assignments for the ASVs were defined against the SILVA 138  
192 ribosomal RNA gene database (Quast et al., n.d.) using DECIPHER v2.14.0 (Wright, n.d.). The sequence variant  
193 table and taxonomy table were exported for downstream processing in *phyloseq* (McMurdie & Holmes, 2013).

194 In *phyloseq*, ASVs designated "NA" at the phylum level, non-Bacterial entries at the domain level, and  
195 those associated to chloroplasts and mitochondria were removed from the taxonomy file before further processing.

196 Finally, we also removed samples with no ASVs remaining after pruning. Rarefying samples has been shown to  
197 effectively reduce false discovery rates when there are large differences between the average sample library size  
198 (Weiss et al., 2017). Our data was characteristic of this scenario. Therefore, we rarefied samples to 1000 sequences,  
199 to retain as many samples as possible while also maintaining a sufficient sampling depth to detect the most prevalent  
200 taxa comprising the switchgrass core microbiome (See below).

201

### 202 **Alpha diversity analysis**

203 Using the rarefied ASV dataset, we generated alpha diversity metrics using *phyloseq* (McMurdie &  
204 Holmes, 2013). Statistical significance was calculated using the *vegan* 2.5.6 package (Oksanen et al., 2019), and  
205 other core functions in R version 3.6.3 (Ihaka & Gentleman, 1996). The Chao1 and Shannon diversity indices were  
206 calculated using the `estimate_richness()` function in *phyloseq* and then used to test for differences in alpha diversity  
207 between genotypes differing in ecotype, ploidy level, and genetic cluster groups using an analysis of variance  
208 (ANOVA) (R version 3.6.3). Correlations between diversity metrics, anthesis date and full plant height were  
209 generated using the Pearson correlation test.

210

### 211 **Beta diversity and core microbiome analysis**

212 Bacterial diversity data rarely conform to the assumptions of MANOVA-like procedures, largely due to  
213 inflated zero values among rare taxa that skew the distribution, thus non-parametric methods based on permutation  
214 tests are preferred (M. J. Anderson, 2001). A non-parametric, one-way analysis of variance (NPMANOVA) is also  
215 tolerant of non-independent observations (e.g. microbe-microbe interactions). We therefore calculated an  
216 NPMANOVA using the *adonis2* function in *vegan* to test for significant differences between the ecotype, ploidy  
217 level, and genetic cluster groups on the overall rhizosphere microbiome composition using pairwise Bray-Curtis  
218 distances at the ASV level.

219 The ‘core microbiome’ can be defined as microbial taxa that associate with a host above a particular  
220 occupancy frequency threshold (i.e. their prevalence). Biological justifications for such thresholds tend to be  
221 subjective, often ranging between 30% and 95% (Risely, 2020). However, core taxa prevalence within a population  
222 could be a reflection of an environmental response by the host due to local adaptation, resulting in higher intergroup  
223 prevalence of certain ‘core taxa’ relative to the whole population. Thus, we determined two core microbiomes: A



224 high-fidelity core (prevalence  $\geq 90\%$ ), to determine taxa that reliably associate with the vast majority of our panel,  
225 and a low-fidelity core (prevalence  $\geq 10\%$ ), to study host genetic variation effects on bacterial composition. Taxa  
226 present within our rarefied dataset were initially agglomerated using the `tax_glom()` function at all taxonomic levels  
227 in *phyloseq*. Sample counts were then transformed to relative abundances. A filter was applied to subset  
228 phylogenetic groups in abundance greater than 2%. Each core microbiome was determined using the *microbiome*  
229 package in R (Lahti, Shetty, & Blake, 2017). The `core()` function in the *microbiome* package (`detection = 0`,  
230 `prevalence = 0.9` and `0.1`, respectively) was applied at each taxonomic level to determine the core taxa among all  
231 genotypes.

232

### 233 **Heritability Estimates**

234 Heritability is an estimate that describes the proportion of phenotypic variance that is due to genetic  
235 variance. Narrow-sense SNP-based heritability ( $h^2$ ) was estimated using the *sommer* package in R as:  $\sigma_A^2 / \sigma_p^2$ , where  
236  $\sigma_A^2$  is the additive variance and  $\sigma_p^2$  is the total phenotypic variance (additive + dominance) (Covarrubias-Pazaran,  
237 2016). The core function of the *sommer* package is the ‘`mmer`’ function that fits multivariate linear mixed models.  
238 The modified exome capture SNP dataset, described above, was used to generate a kinship matrix used in ‘`mmer`’ to  
239 estimate narrow-sense heritability for each of bacterial families’ abundance. The *sommer* package includes a  
240 tolerance parameter for the matrix inverse when singularities are encountered in the estimation procedure. Here,  
241 inversion tolerance parameters were adjusted to 10 to avoid model singularity.

242

### 243 **Redundancy Analysis (RDA) and variance partitioning**

244 To determine how whole microbiome variation changed across host genomic variation, much of which is  
245 due to population structure, we implemented redundancy analysis (RDA). RDA models variation in a set of  
246 response variables as a function of a set of explanatory variables. We used the first 10 principal components of  
247 switchgrass SNPs (Evans et al. 2014) as explanatory variables that describe population structure in switchgrass  
248 (Brown, Bray, & Pachter, 2018) and log-scaled ASV counts for each switchgrass genotype as the response variables.  
249 We performed the RDA to explain the relative proportion of total genotypic variance on the overall microbiome  
250 composition. The `rda()` function in *vegan* (Oksanen et al., 2019) was used to perform the RDA for the tetraploid  
251 accessions. For host genomic analyses like this RDA, we focused on tetraploids; since they (1) represent both upland

252 and lowland ecotypes, (2) exhibit disomic inheritance unlike octoploids, and (3) exhibit more inter-group alpha  
253 diversity variation compared to octoploids.

254 We identified outlier ASVs with the strongest loadings, based on inter-quartile range criteria, on the first  
255 two RDA canonical axes; these ASVs are those most representative of microbiome-wide turnover across  
256 switchgrass hosts of different genomic background. ASVs that were labeled as outliers were then assigned  
257 taxonomic rank using the *phyloseq* method described above and compared to families in the original ASV dataset.

258 To dissect how genomic variation combined with ecotype, ploidy, and phenotypes to explain bacterial  
259 compositional turnover we also implemented variance partitioning of the RDA. Variance partitioning allows one to  
260 estimate the portions of compositional turnover explained by multiple sets of factors (Peres-Neto et al., 2006), which  
261 here were the first 10 principal components of SNPs, ecotype, geography-of-origin (latitude, longitude, and their  
262 squared values), and our two focal phenotypes (anthesis date and height). We implemented two versions of variance  
263 partitioning with RDA: one on ASV counts and the other on family abundances, to test whether family-level  
264 composition was differently associated with these factors than was ASV level composition.

265

## 266 **Genome-wide association study (GWAS)**

267 To identify specific loci in the switchgrass genome linked to variation in rhizosphere bacterial composition,  
268 a genome-wide association study (GWAS) was conducted using the *statgenGWAS* package in R (Rossum et al.,  
269 2020). This fast single trait GWAS method was developed by Biometris, following the method described in Kang et  
270 al (2010). The modified SNP dataset, described above, was once again used for this analysis.

271 Family-level abundance counts data (1) were imported from *phyloseq* using the rarified phyloseq object  
272 and a chromosome positional map (2) was generated from the SNP matrix (3). These three components were used to  
273 construct the R object used by *statgenGWAS*. Initial results from the heritability estimates and RDA indicated that  
274 certain core families of bacteria were influenced by switchgrass genotype. Therefore, to determine associated genes,  
275 a single trait GWAS, where the trait was the abundance of each of the families, was completed using a Generalized  
276 Least Squares (GLS) method for estimating the marker effects and corresponding p-values. Our GWAS included  
277 random effects correlated according to the kinship matrix, which was calculated with the VanRaden method  
278 (VanRaden, 2008). A p-value threshold is required for this method to minimize the False Discovery Rate (FDR)  
279 following the algorithm proposed by Brzyski et al. (2017). The method limits the number of SNPs in statistical

280 linkage with each other passing FDR control. Significant SNPs were identified using a 0.01 threshold for the false-  
281 discovery rate (FDR). Linkage disequilibrium (LD) in switchgrass decays over kilobase length. Following  
282 Grabowski et al. (2017), we used a window of 25kb to identify genes potentially linked to significant SNPs. Thus, in  
283 this study, we defined SNPs within 25 kb as being “within LD of significant SNPs”. For each trait, *statgenGWAS*  
284 outputs significant SNPs and SNPs within the defined cutoff. A full description of the method can be found in  
285 Rossum et al. (2020).

286

## 287 **GO Enrichment Analysis**

288 Significant SNPs associated with bacterial family abundance and positions within 25 kb of significant  
289 SNPs were then used to identify associated genes and gene ontologies. Here, we focused on three families:  
290 Xanthobacteraceae, Sphingomonadaceae, and Micromonosporaceae. The Xanthobacteraceae and  
291 Sphingomonadaceae families were chosen because they represent the high-fidelity core microbiome.  
292 Micromonosporaceae was chosen due to its high relative heritability within our panel and its importance in  
293 agriculture applications (Trujillo, Hong, & Genilloud, 2014). *Phytomine* was used to identify Gene IDs for each  
294 family using the *P. virgatum v1.1* reference genome at [www.phytozome.net](http://www.phytozome.net). Gene IDs for corresponding SNPs were  
295 then used to perform a Singular Enrichment Analysis (SEA) against the gene ID (ver. 4) background for *P. virgatum*  
296 using the agrigo v2 web program (Du, Zhou, Ling, Zhang, & Su, 2010). Default parameters were used.

297

## 298 **Results**

### 299 **Amplicon Sequence Analysis**

300 For 383 initial rhizosphere soil samples, 96,902 amplicon sequences variants (ASVs) were obtained  
301 following initial quality filtering and sequence processing in *dada2* (Callahan et al., n.d.). After sample pruning  
302 (removing non-bacteria from the taxonomy table) and rarefaction (1,000 sequences/sample) in *phyloseq*, 365  
303 samples containing 31,181 ASVs remained. Counts for unique phylogenetic classifications are as follows: Domain:  
304 1, Phylum: 26, Class: 59, Order: 142, Family: 268, Genus: 510.

305

### 306 **Alpha diversity analysis**

307 We detected significant differences in alpha diversity (Chao1 and Shannon Diversity) between groups.  
308 Upland ecotypes, which are adapted to regions at higher latitudes and those geographically closer to our growing  
309 site, exhibited higher rhizosphere diversity compared to lowland ecotypes (Figure 1A, Upland-Lowland:  $p_{adj}$   
310 (Shannon) =  $1.58e^{-2}$ ). Tetraploids, which are present in both upland and lowland ecotype groups, also exhibited  
311 higher diversity overall, compared to octoploids, which are exclusively upland (Figure 1B, 4X-8X:  $p_{adj}$  (Shannon)  
312 =  $<0.001$ ). Finally, the North genetic cluster, primarily comprised of upland tetraploids, exhibited the highest  
313 rhizosphere diversity among all of the genetic clusters and there was a significant difference between the East and  
314 West genetic clusters (Figure 1C, North-East:  $p_{adj}$  (Shannon) =  $<0.001$ , North-West:  $p_{adj}$  (Shannon) =  $<0.001$ ,  
315 North-Northeast:  $p_{adj}$  (Shannon) =  $<0.001$ , North-South:  $p_{adj}$  (Shannon) =  $<0.001$ , East-West:  $p_{adj}$  (Shannon) =  
316  $5.92e^{-2}$ ). All diversity measurements for accessions can be found in Supplemental Table 1.

317 We found that Chao1 and Shannon diversity were negatively correlated with anthesis date (Chao1:  $r = -$   
318  $0.17$ ,  $p$ -value =  $0.0014$ ; Shannon:  $r = -0.18$ ,  $p$ -value =  $<0.001$ ) and full plant height (Chao1:  $r = -0.18$ ,  $p$ -value =  
319  $0.0012$ ; Shannon:  $r = -0.13$ ,  $p$ -value =  $0.017$ ). We also considered these trait-diversity associations stratified by  
320 ecotype, ploidy, and genetic cluster (Figure 2). In general, the negative diversity association with anthesis date and  
321 height was broadly consistent, with Shannon diversity negatively correlated with plant height for Upland ecotypes ( $r$   
322 =  $-0.25$ ,  $p$ -value =  $<0.001$ ), octoploids ( $r = -0.23$ ,  $p$ -value =  $0.0045$ ), hybrids ( $r = -0.73$ ,  $p$ -value =  $0.016$ ), the North  
323 genetic cluster ( $r = -0.27$ ,  $p$ -value =  $0.011$ ), the Northeast genetic cluster ( $r = -0.22$ ,  $p$ -value =  $0.061$ ), and the West  
324 genetic cluster ( $r = -0.24$ ,  $p$ -value =  $0.032$ ) (Figure 2A,B,C). Likewise, Shannon diversity negatively correlated with  
325 anthesis date for Upland ecotypes ( $r = -0.19$ ,  $p$ -value =  $0.002$ ), tetraploids ( $r = -0.23$ ,  $p$ -value =  $0.0025$ ), hybrids ( $r =$   
326  $-0.94$ ,  $p$ -value =  $<0.001$ ), and the Northeast genetic cluster ( $r = -0.45$ ,  $p$ -value =  $<0.001$ ) (Figure 2D,E,F). A subset  
327 ( $n = 7$ ) of ecotype/ploidy/genetic cluster combinations showed positive trait correlations with Shannon diversity, but  
328 these were not significant.

329

### 330 **Beta diversity analysis**

331 We performed separate multivariate analyses of variance on a Bray-Curtis distance matrix using the  
332 NPMANOVA test. There were significant differences in overall bacterial composition between ecotypes ( $p <$   
333  $0.001$ ), ploidy levels ( $p < 0.001$ ), and genetic clusters ( $p < 0.001$ ), indicating differences in overall composition  
334 associated with switchgrass genetics and life-history.

335           Although all taxonomic levels were tested, the family level was identified as the lowest taxonomic rank  
336 with the ability to retain a high-fidelity core (Supplemental Figure 2). The high-fidelity core microbiome ( $\geq 90\%$  of  
337 samples) contained two families: Xanthobacteraceae and Sphingomonadaceae. The low-fidelity core microbiome  
338 ( $\geq 10\%$  of samples) contained 110 families (Supplemental Table 2).

339

#### 340 **Host Genomic Influence**

341           Of the 110 families in the core microbiome, twenty-one showed narrow-sense SNP-based heritability ( $h^2$ )  
342 significantly greater than zero (Figure 3). The standard errors of narrow-sense heritability estimates are very large  
343 and there is considerable uncertainty in the estimate overall (Furlotte, Heckerman, & Lippert, 2014). Therefore, we  
344 consider estimates with standard errors that do not intersect zero as showing evidence of heritability (i.e. heritable).  
345 Heritability estimates for low-fidelity core taxa in the switchgrass rhizosphere ranged from 0.106 to 0.539, with a  
346 mean of 0.241. Heritability estimates presented here for bacterial lineages have a range similar to that of corn and  
347 sorghum (Deng et al., 2021). The heritability estimates indicate that, in part, switchgrass genotype influences the  
348 variability in the relative abundance of certain families within our growing site. Heritability estimates for all  
349 bacterial families can be found in Supplemental Table 2.

350           Next, we performed a redundancy analysis (RDA) to characterize how the whole rhizosphere bacterial  
351 assemblage changes in association with host genomic background (Figure 4, Supplemental Figure 3). The RDA  
352 results indicate that genotypic variability among tetraploids (i.e. first 10 PCs of SNPs) had modest influences on  
353 bacterial ASV composition ( $R^2 = 0.063$ ,  $R^2_{\text{adjusted}} = 0.007$ ). Switchgrass SNP PC1, which is associated with  
354 separation between the North and the Northeast and South genetic clusters, loaded most strongly to the first primary  
355 canonical axis (RDA1, PC1 = 0.99, the next strongest loaded PC was PC10, with a 0.097 loading). Switchgrass SNP  
356 PC7, which is associated the variance in the North genetic cluster, loaded most strongly to the second canonical axis  
357 (RDA2, PC7 = 0.899). The proportion of explained variance in bacterial ASV composition was fairly low along  
358 these individual canonical axes (RDA1 = 0.9%, RDA2 = 0.7%), which was unsurprising given the large diversity in  
359 the bacterial composition. Still, the RDA identified bacterial ASV compositional turnover in association with  
360 switchgrass population structure, as shown by the turnover between the North and the Northeast and South  
361 switchgrass genetic clusters (Figure 4).

362 Outlier ASVs were determined for each of the first two canonical RDA axes ( $n = 9,215$ ). These outlier  
363 ASVs are most representative of the variation in bacterial composition among the tetraploid genotypes. We then  
364 identified the taxonomic ranks for the outlier ASVs. Our results show that Xanthobacteraceae and  
365 Sphingomonadaceae represent the high-fidelity core for both the outlier ASV dataset and the original ASV dataset,  
366 signifying host genotypic influence might be strongest on these families. When we consider the low-fidelity core ( $n$   
367 = 110 families), 70.9% of families in the RDA outlier ASV core microbiome are in original core microbiome  
368 (Supplemental Table 2). When we consider just the heritable families, 80.95% of heritable families in the outlier  
369 ASV core microbiome are in the original core microbiome (Supplemental Table 2).

370 When we applied variance partitioning to estimate the portion of ASV-level compositional turnover  
371 explained by SNP PCs, ecotype, geographic origin (i.e. latitude and longitude coordinates), and the two phenotypes,  
372 we found that the total  $R^2_{\text{adjusted}}$  was low, approximately %1 of ASV composition. However, variance partitioning of  
373 family-level turnover found these 4 factors explained a larger portion, with  $R^2_{\text{adjusted}} = 0.096$  (Figure 4). This variance  
374 partitioning found that the largest portion of bacterial compositional variation was explained by the collinear portion  
375 of SNP PCs, ecotype, and geographic origin ( $R^2_{\text{adjusted}} = 0.0866$ ), suggesting that geographic population structure  
376 associated with ecotypic variation explains a large portion of turnover in bacterial family composition.

377

### 378 **Genome-wide association study**

379 A primary limitation of heritability estimates and the RDA was that we could not account for which SNPs  
380 have the greatest effect on compositional variation. To overcome this, a genome-wide association study (GWAS)  
381 was conducted to identify specific loci associated with the relative abundance of families in the core microbiome. In  
382 total, 1,861 SNPs were found to be associated with the abundance of the 110 tested core families. 878 SNPs were  
383 found to be associated with the abundance of the 21 heritable core families. Furthermore, 36 SNPs were found to be  
384 associated with the abundance of the two families (Xanthobacteraceae and Sphingomonadaceae) that represent the  
385 high-fidelity core microbiome (Figure 6, Supplemental Table 2).

386

### 387 **GO Enrichment Analysis**

388 Despite the general difficulty identifying specific molecular functions or pathways in non-model plant  
389 species, resources for gene ontology (GO) still remain useful for biological inference (Tian et al., 2017). Therefore,

390 we completed a GO enrichment analysis for genes harboring significant SNPs and positions within 25kb of  
391 significant SNPs to determine possible cellular processes (P), cellular components (C), and molecular functions (F)  
392 associated with three core family abundances (Supplemental Table 3). Primarily, we identified two types of cellular  
393 processes: metabolic and stimuli response processes. Broadly, we identified several molecular functions relating to  
394 ATPase activity, hydrolase activity, and pyrophosphatase activity (Supplemental Figure 4, Supplemental Table 3).  
395 Functions involving ATP hydrolysis as an energy source either typically catalyze a reaction or drive membrane  
396 transport against a concentration gradient (Berg, Tymoczko, & Stryer, 2002). In the context of our GWAS, this  
397 could suggest possible root exudate activity whereby switchgrass genotypes differentially transport exudates against  
398 a lower soil compound gradient influencing core family abundances. Perturbing these regions in future studies could  
399 reveal the underlying pathways and mechanisms. Lastly, genes harboring SNPs associated with Sphingomonadaceae  
400 abundance, in particular, were enriched for GO terms associated with cellular membrane components,  
401 metallopeptidase and metalloendopeptidase activity, and cellular processes that relate to metabolism and response to  
402 stimuli (Supplemental Table 3). Again, given the context of our GWAS, we suspect that the genes associated with  
403 these GO terms could interact with Sphingomonadaceae populations in the soil. More work involving these genes  
404 could expose perturbations that more predictably affect Sphingomonadaceae abundance in switchgrass.

405

## 406 **Discussion**

407       Macroscopic organisms often exhibit striking variation among individuals in the microbial assemblages  
408 they host, but the genetic basis and ecological relevance of this variation is often unclear. Common garden  
409 experiments with diverse genotypes offer a powerful window into dissecting the ecological genomics of host  
410 influences on their microbiomes. Previous studies have demonstrated that genomic differences among switchgrass  
411 genotypes and populations may, in part, have led to much of the adaptive phenotypic differences observed between  
412 switchgrass populations (Adkins et al., 2016; Lowry et al., 2019). We add to these observations by showing a similar  
413 phenomenon within a less visible portion of the switchgrass phenotype. We found that switchgrass genotype  
414 influences the rhizosphere microbiome in a variety of ways relative to bacterial alpha and beta diversity as a result of  
415 variability within the switchgrass genome.

416       We demonstrated that the alpha diversity (Chao1 and Shannon diversity) of rhizosphere bacteria within a  
417 common garden was significantly differentiated between switchgrass ecotypes, ploidy levels, and genetic clusters.



418 These groupings with distinct bacterial assemblages are associated with life history variation and locally-adapted  
419 traits in this species. Furthermore, alpha diversity within each group typically had no correlation with, or was  
420 negatively correlated with, anthesis date and plant height (Figure 2). Flowering time is an important adaptation to  
421 local growing conditions and has major fitness consequences for the plant (Grabowski et al., 2017b). In general, in  
422 common garden experiments, upland ecotypes have an anthesis date 2–4 weeks earlier than lowland ecotypes  
423 (Schwartz & Amasino, 2013). As plants move through different developmental stages the diversity and availability  
424 of metabolites influencing the rhizosphere microbiome shifts (Wagner, 2021). Rhizosphere sampling in this study  
425 occurred in May, 2016. Therefore, it's reasonable to expect genotypes at different stages of development at the time  
426 of sampling to exert different selective pressure on the microbiome composition. Future research examining  
427 temporal exudate availability in the rhizosphere of switchgrass could expand on this hypothesis.

428 It is already widely hypothesized that hosts mediate their microbiomes relative to environmental  
429 conditions, resource availability, and microbial function, not necessarily always a specific species or strain  
430 (Lemanceau et al., 2017; Martiny et al., 2015). Thus, some basis for comparing taxa between host groupings  
431 becomes important when determining the taxonomic level at which host influence is detectable. A “core”  
432 microbiome can be defined in a variety of ways, and may not represent microbes that have the most important  
433 functional impacts on a system (Bell & Bell, 2021). For example, commensal microorganisms remain widespread  
434 throughout host populations (Zeng et al., 2015). Still, the consistent occurrence of microbial taxa provides an  
435 opportunity to assess relationships between host genetics and microbial recruitment. Here, we applied the “common  
436 core” concept (Risely, 2020) to identify bacterial taxa that were consistently associated with diverse switchgrass  
437 genotypes in a common garden. Given the disparity in evolutionary pace (i.e. there are many bacterial generations  
438 during the lifecycle of a switchgrass plant), it is unlikely that switchgrass has mechanisms to distinguish between  
439 closely related bacterial taxa unless doing so provided a substantial fitness advantage (Yin et al., 2021). Therefore,  
440 the core microbiome provides both a basis for measuring bacterial abundance across multiple switchgrass genotypes  
441 as well as a means to detect host genomic influence at the lowest possible taxonomic rank.

442 For example, Singer et al. (2019) observed a large core endophytic switchgrass microbiome dominated by  
443 root-colonizing bacterial genera such as *Streptomyces*, *Pseudomonas*, and *Bradyrhizobium*, while rhizosphere  
444 diversity was more variable between their two sampling sites. Likewise, Singer et al. (2019b) observed different  
445 core bacterial classes associated with upland and lowland switchgrass ecotypes, with each ecotype preferentially



446 enriched for Alphaproteobacteria and Actinobacteria, respectively. For our study, out of 268 families, only two  
447 associated with the majority ( $\geq 90\%$ ) of our rhizosphere samples (Xanthobacteraceae and Sphingomonadaceae) and  
448 less than half ( $n = 110$ ) associated with more than 10% of our samples. Xanthobacteraceae and Sphingomonadaceae  
449 are families in the Alphaproteobacteria class. We were unable to detect any genera or species associated with our  
450 genotypes at the 90% occupancy threshold. This indicates that a large swath of the switchgrass rhizosphere  
451 microbiome assembly is stochastic and only certain lineages were able to consistently associate with our genotypes  
452 in the common garden.

453         The abundance of twenty-one of the 110 families were determined to show evidence of heritability. After  
454 reasonably establishing heritability of select core families, the RDA allowed us to identify how genome-wide  
455 variation in switchgrass influenced the rhizosphere microbiome composition. RDA methods used in microbial  
456 ecology typically explain the variance in microbiome composition due to environmental variables, such as  
457 temperature or pH (Paliy & Shankar, 2016). However, here, we modeled microbial compositional data as a function  
458 of host genomic data. As such, the RDA in this study represents the compositional variance of the microbiome due  
459 to genetic variation in the hosts. We then extended the analysis to explore outlier ASVs along each of the first two  
460 RDA axes, because those ASVs represent taxa associated with host genomic influence on overall turnover in  
461 bacterial composition. Once clustered at the family level, we determined that seventeen out of the 21 heritable  
462 families were in the outlier ASV dataset. Additionally, the results of the variance partitioning suggest that  
463 geographic population structure associated with ecotypic variation explains a larger portion of turnover in bacterial  
464 family composition compared to ASV composition. Thus, we determined that genotypic variability in switchgrass  
465 sampled from across its natural range influences the composition of the rhizosphere bacterial microbiome,  
466 particularly for tetraploids.

467         The ecophysiology of host-microbe interactions in our study is unclear, requiring detailed investigation, but  
468 there may be hints in the function of switchgrass genes that are strongly associated with core family abundances. We  
469 conducted a GWAS to identify potential loci that strongly associate with core family abundances. The outcrossing  
470 nature of switchgrass and its rapid decay in LD can help pinpoint causal loci with GWAS. Several considerations  
471 had to be made though, in order to reliably trust the significance of the resulting QTLs. First, we considered only  
472 tetraploids for the same reasons as the RDA, that they (1) represent both upland and lowland ecotypes, (2) exhibit  
473 disomic inheritance unlike octoploids, increasing the effect size of additive effects, and (3) exhibit the most inter-

474 group alpha diversity variation compared to octoploids or hybrids. We used exome capture SNPs (Evans et. al.  
475 (2018), which are more effective than genotype-by-sequencing (GBS) in their ability to tag causal polymorphisms,  
476 compared to GBS SNPs that are often far from any genes (Kaur et al., 2014). The identification of genes containing  
477 significant SNPs could provide insights into potential host-microbe interaction pathways. To explore this  
478 relationship further, we chose to focus on three core families: Xanthobacteraceae, Sphingomonadaceae, and  
479 Micromonosporaceae.

480 We identified hundreds of switchgrass genes containing SNPs (including those within 25 kb of significant  
481 SNPs) associated with Micromonosporaceae (n = 315), Xanthobacteraceae (n = 578), and Sphingomonadaceae (n =  
482 718) abundance in the rhizosphere. Many species within the Micromonosporaceae family degrade chitin, cellulose,  
483 lignin, and pectin, and play an important role in the turnover of organic plant material. Moreover, many strains  
484 produce useful secondary metabolites and enzymes used by plants (Trujillo et al., 2014). Members of  
485 Xanthobacteraceae have been experimentally identified as nitrate reducers (C. R. Anderson et al., 2011) and  
486 therefore their regulation could be important to host metabolic activity. Our GO enrichment analysis indicates that  
487 genes associated with Micromonosporaceae and Xanthobacteraceae abundance are involved in hydrolase,  
488 pyrophosphatase, and ATPase activity suggesting that the enrichment for this set of genes plays an important role in  
489 overall plant fitness. Members of the Sphingomonadaceae family are known to be antagonistic against plant  
490 pathogens and induce plant growth promotion (Glaeser & Kämpfer, 2014). GO terms for genes associated with this  
491 family are enriched for metallopeptidase and metalloendopeptidase activity, membrane cellular components, and  
492 processes involved in stimuli response. Altogether, this suggests that the activity of these genes is linked to  
493 environmental stimuli, possibly initiated by Sphingomonadaceae, and interacting with plant cell membranes. Future  
494 work examining these families could make these connections to plant function more robust.

495 In conclusion, bacterial composition in the switchgrass rhizosphere is influenced by host genotypic  
496 variability. Rhizosphere diversity shows major differences among switchgrass ecotypes, ploidy levels, genetic  
497 clusters, and life-history axes. In particular, the North switchgrass genetic cluster was most distinct at our common  
498 garden site. Two high-fidelity core families, Xanthobacteraceae and Sphingomonadaceae, were observed across the  
499 majority of our switchgrass genotypes. Twenty-one bacterial families were found to exhibit evidence for heritability.  
500 Though the explained variance was low, a redundancy analysis revealed widespread genotypic influence on the  
501 composition of the rhizosphere bacterial microbiome and outlier ASVs along each primary axis belonged largely to

502 our defined core microbiome. Finally, we identified 1,861 SNPs associated with the abundance of core microbiome  
503 families and discussed potential pathway mechanisms that could influence a subset of those families that we  
504 expected could influence host fitness. A GO enrichment analysis determined several functional and cellular  
505 processes for which host genotypic influence could be expressed, notably by hydrolase activity. This study should  
506 function as a foundation on which further exploration can be achieved investigating the relationship between  
507 switchgrass genotype and its associated rhizosphere microbiome in different environmental contexts or under  
508 artificial genetic perturbation.

509

510

## 511 **Acknowledgements**

512 We thank Wanyan Wang for assistance in collecting and cataloging the soil samples from the GWAS panel  
513 and selecting samples for metagenome analysis. We thank Maureen Mailander for conducting the initial rhizosphere  
514 soil DNA extractions. We are also grateful to our entire project team (investigators Marvin Hall, Stacy Bonos, Julie  
515 Hanson, Don Viands, and their students and staff for the collection of the GWAS family plants from the common  
516 garden site at Ithaca, NY). We greatly appreciate the opportunity provided by Dr. Michael Casler for allowing us to  
517 collect samples of all of the genotypes in this range-wide collection of switchgrass genotypes and check cultivars at  
518 of Cornell University for this project. This research was supported by the National Institute of Food and  
519 Agriculture, U.S. Department of Agriculture, under award number 2019-67009-29006 to JEC, TBH, and JRL. Seed  
520 support was provided by the Northeast Woody/warm-season BIOMass consortium, funded by USDA-AFRI Grant  
521 #2012-68005-19703. Program support to JEC was provided through the USDA National Institute of Food and  
522 Agriculture Federal Appropriations under Project PEN04532 and Accession number 1000326. JRL was also  
523 supported by NIH award 1R35GM138300-01.

524

## 525 **References**

- 526 Adkins, J., Jastrow, J. D., Morris, G. P., Six, J., & de Graaff, M. A. (2016). Effects of switchgrass cultivars and  
527 intraspecific differences in root structure on soil carbon inputs and accumulation. *Geoderma*, 262, 147–154.  
528 doi: 10.1016/j.geoderma.2015.08.019
- 529 Anderson, C. R., Condrón, L. M., Clough, T. J., Fiers, M., Stewart, A., Hill, R. A., & Sherlock, R. R. (2011).  
530 Biochar induced soil microbial community change: Implications for biogeochemical cycling of carbon,  
531 nitrogen and phosphorus. *Pedobiologia*, 54(5–6), 309–320. doi: 10.1016/j.pedobi.2011.07.005
- 532 Anderson, M. J. (2001). A new method for non-parametric multivariate analysis of variance. *Austral Ecology*, 26(1),  
533 32–46. doi: 10.1111/j.1442-9993.2001.01070.pp.x

- 534 Apprill, A., McNally, S., Parsons, R., & Weber, L. (2015). Minor revision to V4 region SSU rRNA 806R gene  
535 primer greatly increases detection of SAR11 bacterioplankton. *Aquatic Microbial Ecology*. doi:  
536 10.3354/ame01753
- 537 Baetz, U., & Martinoia, E. (2014, February 1). Root exudates: The hidden part of plant defense. *Trends in Plant*  
538 *Science*, Vol. 19, pp. 90–98. doi: 10.1016/j.tplants.2013.11.006
- 539 Beilsmith, K., Thoen, M. P. M., Brachi, B., Gloss, A. D., Khan, M. H., & Bergelson, J. (2019). Genome-wide  
540 association studies on the phyllosphere microbiome: Embracing complexity in host-microbe interactions. *The*  
541 *Plant Journal*, 97(1), 164–181. doi: 10.1111/tpj.14170
- 542 Bell, T. H., & Bell, T. (2021). Many roads to bacterial generalism. *FEMS Microbiology Ecology*. doi:  
543 10.1093/femsec/fiaa240
- 544 Berg, J. M., Tymoczko, J. L., & Stryer, L. (2002). *A Family of Membrane Proteins Uses ATP Hydrolysis to Pump*  
545 *Ions Across Membranes*. Retrieved from <https://www.ncbi.nlm.nih.gov/books/NBK22464/>
- 546 Bever, J. D., Platt, T. G., & Morton, E. R. (2012). Microbial population and community dynamics on plant roots and  
547 their feedbacks on plant communities. *Annual Review of Microbiology*, 66, 265–283. doi: 10.1146/annurev-  
548 micro-092611-150107
- 549 Bordenstein, S. R., & Theis, K. R. (2015). Host biology in light of the microbiome: Ten principles of holobionts and  
550 hologenomes. *PLoS Biology*, 13(8). doi: 10.1371/journal.pbio.1002226
- 551 Bouton, J. H. (2007, December 1). Molecular breeding of switchgrass for use as a biofuel crop. *Current Opinion in*  
552 *Genetics and Development*, Vol. 17, pp. 553–558. doi: 10.1016/j.gde.2007.08.012
- 553 Bradbury, P. J., Zhang, Z., Kroon, D. E., Casstevens, T. M., Ramdoss, Y., & Buckler, E. S. (2007). TASSEL:  
554 software for association mapping of complex traits in diverse samples. *Bioinformatics*, 23(19), 2633–2635.  
555 doi: 10.1093/BIOINFORMATICS/BTM308
- 556 Brown, B. C., Bray, N. L., & Pachter, L. (2018). Expression reflects population structure. *PLoS Genetics*, 14(12),  
557 e1007841. doi: 10.1371/journal.pgen.1007841
- 558 Brzyski, D., Peterson, C. B., Sobczyk, P., Candès, E. J., Bogdan, M., & Sabatti, C. (2017). Controlling the rate of  
559 GWAS false discoveries. *Genetics*. doi: 10.1534/genetics.116.193987
- 560 Callahan, B. J., McMurdie, P. J., Rosen, M. J., Han, A. W., Johnson, A. J. A., & Holmes, S. P. (n.d.). DADA2: *High*  
561 *resolution sample inference from Illumina amplicon data*. doi: 10.1038/nmeth.3869
- 562 Callahan, B. J., McMurdie, P. J., Rosen, M. J., Han, A. W., Johnson, A. J. A., & Holmes, S. P. (2016). DADA2:  
563 High-resolution sample inference from Illumina amplicon data. *Nature Methods*, 13(7), 581–583. doi:  
564 10.1038/nmeth.3869
- 565 Carvalhais, L. C., Dennis, P. G., Fan, B., Fedoseyenko, D., Kierul, K., Becker, A., ... Borriss, R. (2013). Linking  
566 Plant Nutritional Status to Plant-Microbe Interactions. *PLoS ONE*, 8(7). doi: 10.1371/journal.pone.0068555
- 567 Casler, M. D., Vogel, K. P., & Harrison, M. (2015). Switchgrass Germplasm Resources. *Crop Science*, 55(6), 2463–  
568 2478. doi: 10.2135/cropsci2015.02.0076
- 569 Compant, S., Clément, C., & Sessitsch, A. (2010, May 1). Plant growth-promoting bacteria in the rhizo- and  
570 endosphere of plants: Their role, colonization, mechanisms involved and prospects for utilization. *Soil Biology*  
571 *and Biochemistry*, Vol. 42, pp. 669–678. doi: 10.1016/j.soilbio.2009.11.024
- 572 Costich, D. E., Friebe, B., Sheehan, M. J., Casler, M. D., & Buckler, E. S. (2010). Genome-size Variation in  
573 Switchgrass (*Panicum virgatum*): Flow Cytometry and Cytology Reveal Rampant Aneuploidy. *The Plant*  
574 *Genome*, 3(3), 130–141. doi: 10.3835/plantgenome2010.04.0010
- 575 Covarrubias-Pazarán, G. (2016). Genome-Assisted prediction of quantitative traits using the r package sommer.  
576 *PLoS ONE*. doi: 10.1371/journal.pone.0156744
- 577 Das, M. K., Fuentes, R. G., & Taliaferro, C. M. (2004). Genetic Variability and Trait Relationships in Switchgrass.  
578 *Crop Science*, 44(2), 443–448. doi: 10.2135/cropsci2004.4430
- 579 Deng, S., Caddell, D. F., Xu, G., Dahlen, L., Washington, L., Yang, J., & Coleman-Derr, D. (2021). Genome wide  
580 association study reveals plant loci controlling heritability of the rhizosphere microbiome. *ISME Journal*, 1–  
581 14. doi: 10.1038/s41396-021-00993-z
- 582 Dennis, P. G., Miller, A. J., & Hirsch, P. R. (2010). Are root exudates more important than other sources of  
583 rhizodeposits in structuring rhizosphere bacterial communities? *FEMS Microbiology Ecology*. doi:  
584 10.1111/j.1574-6941.2010.00860.x
- 585 Du, Z., Zhou, X., Ling, Y., Zhang, Z., & Su, Z. (2010). agriGO: A GO analysis toolkit for the agricultural  
586 community. *Nucleic Acids Research*. doi: 10.1093/nar/gkq310
- 587 Evans, J., Sanciango, M. D., Lau, K. H., Crisovan, E., Barry, K., Daum, C., ... Buell, C. R. (2018). Extensive  
588 Genetic Diversity is Present within North American Switchgrass Germplasm. *The Plant Genome*, 11(1), 1–16.  
589 doi: 10.3835/plantgenome2017.06.0055

- 590 Furlotte, N. A., Heckerman, D., & Lippert, C. (2014). Quantifying the uncertainty in heritability. *Journal of Human*  
591 *Genetics*. doi: 10.1038/jhg.2014.15
- 592 Glaeser, S. P., & Kämpfer, P. (2014). The family Sphingomonadaceae. In *The Prokaryotes: Alphaproteobacteria*  
593 *and Betaproteobacteria* (Vol. 9783642301971, pp. 641–707). doi: 10.1007/978-3-642-30197-1\_302
- 594 Gould, A. L., Zhang, V., Lamberti, L., Jones, E. W., Obadia, B., Korasidis, N., ... Ludington, W. B. (2018).  
595 Microbiome interactions shape host fitness. *Proceedings of the National Academy of Sciences of the United*  
596 *States of America*, 115(51), E11951–E11960. doi: 10.1073/pnas.1809349115
- 597 Grabowski, P. P., Evans, J., Daum, C., Deshpande, S., Barry, K. W., Kennedy, M., ... Casler, M. D. (2017a).  
598 Genome-wide associations with flowering time in switchgrass using exome-capture sequencing data. *New*  
599 *Phytologist*, 213(1), 154–169. doi: 10.1111/nph.14101
- 600 Grabowski, P. P., Evans, J., Daum, C., Deshpande, S., Barry, K. W., Kennedy, M., ... Casler, M. D. (2017b).  
601 Genome-wide associations with flowering time in switchgrass using exome-capture sequencing data. *New*  
602 *Phytologist*. doi: 10.1111/nph.14101
- 603 Hacquard, S., Spaepen, S., Garrido-Oter, R., & Schulze-Lefert, P. (2017). Interplay between Innate Immunity and  
604 the Plant Microbiota. *Annual Review of Phytopathology*, 55, 565–589. doi: 10.1146/annurev-phyto-080516-  
605 035623
- 606 Heijboer, A., de Ruiter, P. C., Bodelier, P. L. E., & Kowalchuk, G. A. (2018). Modulation of Litter Decomposition  
607 by the Soil Microbial Food Web Under Influence of Land Use Change. *Frontiers in Microbiology*, 9(NOV),  
608 2860. doi: 10.3389/fmicb.2018.02860
- 609 Hestrin, R., Lee, M. R., Whitaker, B. K., & Pett-Ridge, J. (2021). The switchgrass microbiome: A review of  
610 structure, function, and taxonomic distribution. *Phytobiomes Journal*. doi: 10.1094/phyto-04-20-0029-fi
- 611 Holland, J. B. (2007, April 1). Genetic architecture of complex traits in plants. *Current Opinion in Plant Biology*,  
612 Vol. 10, pp. 156–161. doi: 10.1016/j.pbi.2007.01.003
- 613 Hu, L., Robert, C. A. M., Cadot, S., Zhang, X., Ye, M., Li, B., ... Erb, M. (2018). Root exudate metabolites drive  
614 plant-soil feedbacks on growth and defense by shaping the rhizosphere microbiota. *Nature Communications*,  
615 9(1), 1–13. doi: 10.1038/s41467-018-05122-7
- 616 Hunter, P. (2018). The revival of the extended phenotype. *EMBO Reports*, 19(7). doi: 10.15252/embr.201846477
- 617 Ihaka, R., & Gentleman, R. (1996). R: A Language for Data Analysis and Graphics. *Journal of Computational and*  
618 *Graphical Statistics*, 5(3), 299–314. doi: 10.1080/10618600.1996.10474713
- 619 Jones, P., Garcia, B. J., Furches, A., Tuskan, G. A., & Jacobson, D. (2019, May 31). Plant host-associated  
620 mechanisms for microbial selection. *Frontiers in Plant Science*, Vol. 10, p. 862. doi: 10.3389/fpls.2019.00862
- 621 Kang, H. M., Sul, J. H., Service, S. K., Zaitlen, N. A., Kong, S. Y., Freimer, N. B., ... Eskin, E. (2010). Variance  
622 component model to account for sample structure in genome-wide association studies. *Nature Genetics*, 42(4),  
623 348–354. doi: 10.1038/ng.548
- 624 Kaur, P., & Gaikwad, K. (2017). From genomes to gene-omes: Exome sequencing concept and applications in crop  
625 improvement. *Frontiers in Plant Science*. doi: 10.3389/fpls.2017.02164
- 626 Lahti, L., Shetty, S., & Blake, T. (2017). Tools for microbiome analysis in R. *Microbiome Package Version 0.99*.
- 627 Lakshmanan, V., Kitto, S. L., Caplan, J. L., Hsueh, Y. H., Kearns, D. B., Wu, Y. S., & Bais, H. P. (2012). Microbe-  
628 associated molecular patterns-triggered root responses mediate beneficial Rhizobacterial recruitment in  
629 Arabidopsis. *Plant Physiology*, 160(3), 1642–1661. doi: 10.1104/pp.112.200386
- 630 Lebeis, S. L., Paredes, S. H., Lundberg, D. S., Breakfield, N., Gehring, J., McDonald, M., ... Dangl, J. L. (2015).  
631 Salicylic acid modulates colonization of the root microbiome by specific bacterial taxa. *Science*, 349(6250),  
632 860–864. doi: 10.1126/science.aaa8764
- 633 Lemanceau, P., Blouin, M., Muller, D., & Moëne-Loccoz, Y. (2017). Let the Core Microbiota Be Functional.  
634 *Trends in Plant Science*. doi: 10.1016/j.tplants.2017.04.008
- 635 Lipka, A. E., Lu, F., Cherney, J. H., Buckler, E. S., Casler, M. D., & Costich, D. E. (2014). Accelerating the  
636 Switchgrass (*Panicum virgatum* L.) Breeding Cycle Using Genomic Selection Approaches. *PLoS ONE*, 9(11),  
637 e112227. doi: 10.1371/journal.pone.0112227
- 638 Lovell, J. T., MacQueen, A. H., Mamidi, S., Bonnette, J., Jenkins, J., Napier, J. D., ... Schmutz, J. (2021). Genomic  
639 mechanisms of climate adaptation in polyploid bioenergy switchgrass. *Nature*, 590(7846), 438–444. doi:  
640 10.1038/s41586-020-03127-1
- 641 Lowry, D. B., Lovell, J. T., Zhang, L., Bonnette, J., Fay, P. A., Mitchell, R. B., ... Juenger, T. E. (2019). QTL ×  
642 environment interactions underlie adaptive divergence in switchgrass across a large latitudinal gradient.  
643 *Proceedings of the National Academy of Sciences of the United States of America*. doi:  
644 10.1073/pnas.1821543116
- 645 Lu, F., Lipka, A. E., Glaubitz, J., Elshire, R., Cherney, J. H., Casler, M. D., ... Costich, D. E. (2013). Switchgrass



- 646 Genomic Diversity, Ploidy, and Evolution: Novel Insights from a Network-Based SNP Discovery Protocol.  
647 *PLoS Genetics*. doi: 10.1371/journal.pgen.1003215
- 648 Martiny, J. B. H., Jones, S. E., Lennon, J. T., & Martiny, A. C. (2015, November 6). Microbiomes in light of traits:  
649 A phylogenetic perspective. *Science*, Vol. 350. doi: 10.1126/science.aac9323
- 650 McLaughlin, S. B., & Kszos, L. A. (2005). Development of switchgrass (*Panicum virgatum*) as a bioenergy  
651 feedstock in the United States. *Biomass and Bioenergy*, 28(6), 515–535. doi: 10.1016/j.biombioe.2004.05.006
- 652 McMurdie, P. J., & Holmes, S. (2013). phyloseq: An R Package for Reproducible Interactive Analysis and Graphics  
653 of Microbiome Census Data. *PLoS ONE*, 8(4), e61217. doi: 10.1371/journal.pone.0061217
- 654 Moran, N. A., & Sloan, D. B. (2015). The Hologenome Concept: Helpful or Hollow? *PLoS Biology*, 13(12). doi:  
655 10.1371/journal.pbio.1002311
- 656 Oksanen, J., Blanchet, F. G., Friendly, M., Kindt, R., Legendre, P., Mcglinn, D., ... Maintainer, H. W. (2019).  
657 vegan: Community Ecology Package. R package version 2.5-5. <https://CRAN.R-project.org/package=vegan>.  
658 *Community Ecology Package*.
- 659 Palazzo, A. F., & Gregory, T. R. (2014). The Case for Junk DNA. *PLoS Genetics*. doi:  
660 10.1371/journal.pgen.1004351
- 661 Paliy, O., & Shankar, V. (2016). Application of multivariate statistical techniques in microbial ecology. *Molecular*  
662 *Ecology*. doi: 10.1111/mec.13536
- 663 Parada, A. E., Needham, D. M., & Fuhrman, J. A. (2016). Every base matters: Assessing small subunit rRNA  
664 primers for marine microbiomes with mock communities, time series and global field samples. *Environmental*  
665 *Microbiology*. doi: 10.1111/1462-2920.13023
- 666 Parker, M. A., Malek, W., & Parker, I. M. (2006). Growth of an invasive legume is symbiont limited in newly  
667 occupied habitats. *Diversity <html\_ent Glyph="&" Ascii="&" /> Distributions*, 12(5), 563–571.  
668 doi: 10.1111/j.1366-9516.2006.00255.x
- 669 Parrish, D. J., & Fike, J. H. (2005, September). The biology and agronomy of switchgrass for biofuels. *Critical*  
670 *Reviews in Plant Sciences*, Vol. 24, pp. 423–459. doi: 10.1080/07352680500316433
- 671 Peres-Neto, P. R., Legendre, P., Dray, P., & Borcard, D. (2006). VARIATION PARTITIONING OF SPECIES  
672 DATA MATRICES: ESTIMATION AND COMPARISON OF FRACTIONS. *Ecology*, 87(10), 2614–2625.  
673 doi: 10.1890/0012-9658
- 674 Quast, C., Pruesse, E., Yilmaz, P., Gerken, J., Schweer, T., Yarza, P., ... Glöckner, F. O. (n.d.). *The SILVA*  
675 *ribosomal RNA gene database project: improved data processing and web-based tools*. doi:  
676 10.1093/nar/gks1219
- 677 Risely, A. (2020). Applying the core microbiome to understand host–microbe systems. *Journal of Animal Ecology*.  
678 doi: 10.1111/1365-2656.13229
- 679 Rossum, B. van, Kruijer, W., Eeuwijk, F. van, & Boer, M. (2020). Package “statgenGWAS” Title Genome Wide  
680 Association Studies. doi: 10.1038/ng.548
- 681 Sanderson, M. A., Adler, P. R., Boateng, A. A., Casler, M. D., & Sarath, G. (2006). Switchgrass as a biofuels  
682 feedstock in the USA. *Canadian Journal of Plant Science*, 86(5), 1315–1325. doi: 10.4141/p06-136
- 683 Sasse, J., Martinoia, E., & Northen, T. (2018, January 1). Feed Your Friends: Do Plant Exudates Shape the Root  
684 Microbiome? *Trends in Plant Science*, Vol. 23, pp. 25–41. doi: 10.1016/j.tplants.2017.09.003
- 685 Schwartz, C., & Amasino, R. (2013). Nitrogen Recycling and Flowering Time in Perennial Bioenergy Crops.  
686 *Frontiers in Plant Science*, 0(APR), 76. doi: 10.3389/FPLS.2013.00076
- 687 Sharma, M. K., Sharma, R., Cao, P., Jenkins, J., Bartley, L. E., Qualls, M., ... Ronald, P. C. (2012). A Genome-  
688 Wide Survey of Switchgrass Genome Structure and Organization. *PLoS ONE*, 7(4), e33892. doi:  
689 10.1371/journal.pone.0033892
- 690 Singer, E., Bonnette, J., Kenaley, S. C., Woyke, T., & Juenger, T. E. (2019). Plant compartment and genetic  
691 variation drive microbiome composition in switchgrass roots. *Environmental Microbiology Reports*, 11(2),  
692 185. doi: 10.1111/1758-2229.12727
- 693 Singer, E., Bonnette, J., Woyke, T., & Juenger, T. E. (2019). Conservation of Endophyte Bacterial Community  
694 Structure Across Two *Panicum* Grass Species. *Frontiers in Microbiology*, 10(SEP), 2181. doi:  
695 10.3389/FMICB.2019.02181
- 696 Smith, C. C. R., Snowberg, L. K., Gregory Caporaso, J., Knight, R., & Bolnick, D. I. (2015). Dietary input of  
697 microbes and host genetic variation shape among-population differences in stickleback gut microbiota. *ISME*  
698 *Journal*, 9(11), 2515–2526. doi: 10.1038/ismej.2015.64
- 699 Stewart, C. E., Roosendaal, D., Deneff, K., Pruessner, E., Comas, L. H., Sarath, G., ... Soundararajan, M. (2017).  
700 Seasonal switchgrass ecotype contributions to soil organic carbon, deep soil microbial community  
701 composition and rhizodeposit uptake during an extreme drought. *Soil Biology and Biochemistry*, 112, 191–

- 702 203. doi: 10.1016/j.soilbio.2017.04.021  
703 Tian, T., Liu, Y., Yan, H., You, Q., Yi, X., Du, Z., ... Su, Z. (2017). AgriGO v2.0: A GO analysis toolkit for the  
704 agricultural community, 2017 update. *Nucleic Acids Research*. doi: 10.1093/nar/gkx382  
705 Trexler, R. V., & Bell, T. H. (2019). Testing sustained soil-to-soil contact as an approach for limiting the abiotic  
706 influence of source soils during experimental microbiome transfer. *FEMS Microbiology Letters*. doi:  
707 10.1093/femsle/fnz228  
708 Trivedi, P., Leach, J. E., Tringe, S. G., Sa, T., & Singh, B. K. (2020, November 1). Plant–microbiome interactions:  
709 from community assembly to plant health. *Nature Reviews Microbiology*, Vol. 18, pp. 607–621. doi:  
710 10.1038/s41579-020-0412-1  
711 Trujillo, M. E., Hong, K., & Genilloud, O. (2014). The family Micromonosporaceae. In *The Prokaryotes:*  
712 *Actinobacteria* (pp. 499–569). doi: 10.1007/978-3-642-30138-4\_196  
713 Van Rossum, G., & Drake, F. L. (2009). *Python 3 Reference Manual*. Scotts Valley, CA: CreateSpace.  
714 VanRaden, P. M. (2008). Efficient methods to compute genomic predictions. *Journal of Dairy Science*, 91(11),  
715 4414–4423. doi: 10.3168/jds.2007-0980  
716 Wagner, M. R. (2021). Prioritizing host phenotype to understand microbiome heritability in plants. *New Phytologist*.  
717 doi: 10.1111/NPH.17622  
718 Wagner, M. R., Lundberg, D. S., Del Rio, T. G., Tringe, S. G., Dangl, J. L., & Mitchell-Olds, T. (2016). Host  
719 genotype and age shape the leaf and root microbiomes of a wild perennial plant. *Nature Communications*, 7.  
720 doi: 10.1038/ncomms12151  
721 Weiss, S., Xu, Z. Z., Peddada, S., Amir, A., Bittinger, K., Gonzalez, A., ... Knight, R. (2017). Normalization and  
722 microbial differential abundance strategies depend upon data characteristics. *Microbiome*, 5(1), 27. doi:  
723 10.1186/s40168-017-0237-y  
724 Werling, B. P., Dickson, T. L., Isaacs, R., Gaines, H., Gratton, C., Gross, K. L., ... Landis, D. A. (2014). Perennial  
725 grasslands enhance biodiversity and multiple ecosystem services in bioenergy landscapes. *Proceedings of the*  
726 *National Academy of Sciences of the United States of America*, 111(4), 1652–1657. doi:  
727 10.1073/pnas.1309492111  
728 Whitham, T. G., Young, W. P., Martinsen, G. D., Gehring, C. A., Schweitzer, J. A., Shuster, S. M., ... Kuske, C. R.  
729 (2003, March 1). Community and ecosystem genetics: A consequence of the extended phenotype. *Ecology*,  
730 Vol. 84, pp. 559–573. doi: 10.1890/0012-9658(2003)084[0559:CAEGAC]2.0.CO;2  
731 Wilson, A. S., Koller, K. R., Ramaboli, M. C., Nesengani, L. T., Ocvirk, S., Chen, C., ... O’Keefe, S. J. D. (2020,  
732 March 1). Diet and the Human Gut Microbiome: An International Review. *Digestive Diseases and Sciences*,  
733 Vol. 65, pp. 723–740. doi: 10.1007/s10620-020-06112-w  
734 Wray, N. R., Yang, J., Hayes, B. J., Price, A. L., Goddard, M. E., & Visscher, P. M. (2013, July). Pitfalls of  
735 predicting complex traits from SNPs. *Nature Reviews Genetics*, Vol. 14, pp. 507–515. doi: 10.1038/nrg3457  
736 Wright, E. S. (n.d.). *Using DECIPHER v2.0 to Analyze Big Biological Sequence Data in R*.  
737 Yin, C., Casa Vargas, J. M., Schlatter, D. C., Hagerty, C. H., Hulbert, S. H., & Paulitz, T. C. (2021). Rhizosphere  
738 community selection reveals bacteria associated with reduced root disease. *Microbiome 2021 9:1*, 9(1), 1–18.  
739 doi: 10.1186/S40168-020-00997-5  
740 Yu, P., & Hochholdinger, F. (2018). The role of host genetic signatures on root–microbe interactions in the  
741 rhizosphere and endosphere. *Frontiers in Plant Science*, Vol. 871. doi: 10.3389/fpls.2018.01896  
742 Zeng, Q., Sukumaran, J., Wu, S., & Rodrigo, A. (2015). Neutral Models of Microbiome Evolution. *PLOS*  
743 *Computational Biology*, 11(7), e1004365. doi: 10.1371/journal.pcbi.1004365  
744

#### 745 **Data Availability**

746 Raw amplicon sequence reads are deposited in the SRA (BioProject PRJNA689762).

747

#### 748 **Figure and Table Captions**

749 Figures:

750

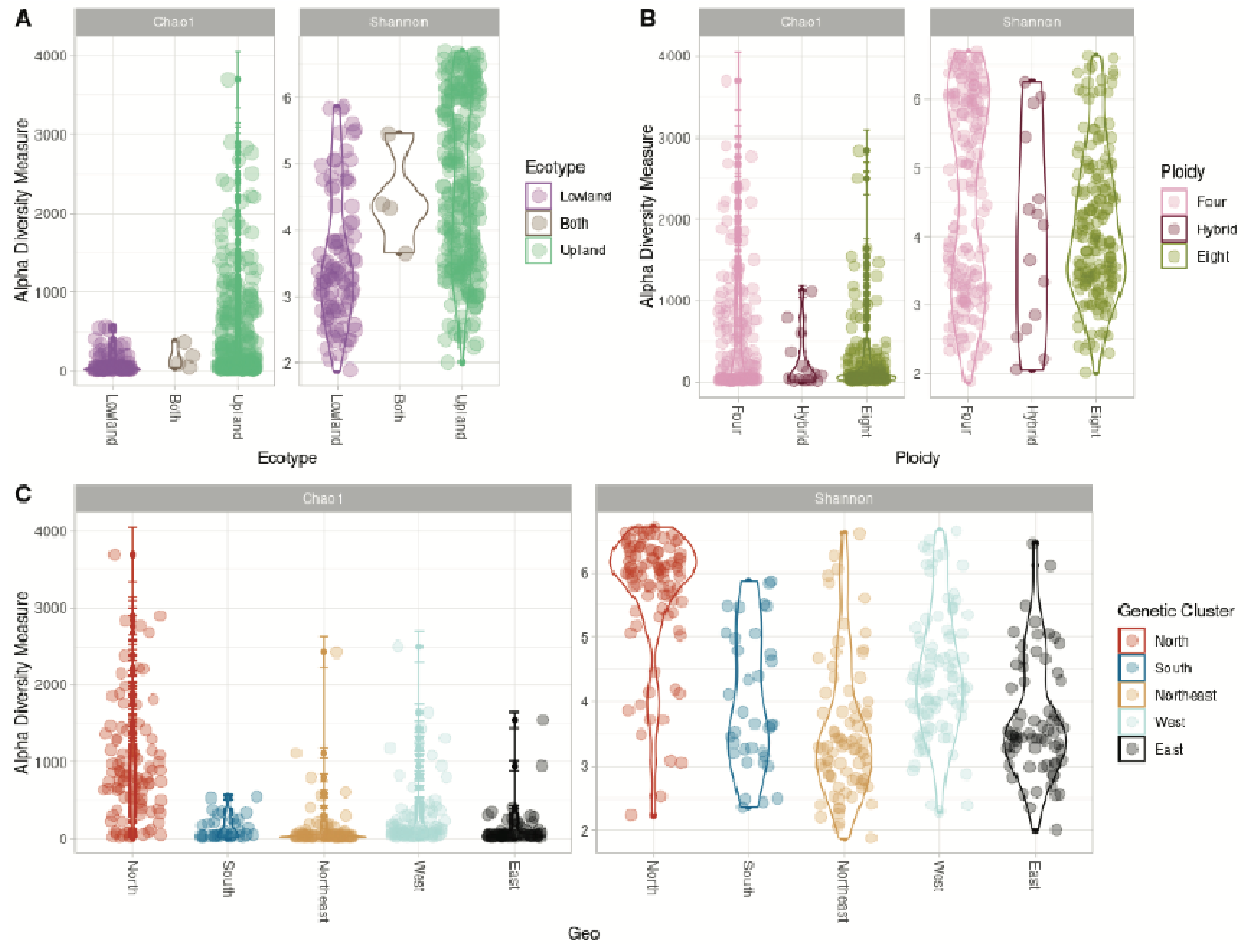

751  
752  
753  
754  
755  
756  
757  
758  
759  
760

**Figure 1:**

**A: Alpha diversity by Ecotype.** Alpha-diversity, measured by Chao1 and Shannon diversity Index, plotted for switchgrass ecotypes with Lowland (purple), Both (brown), and Upland (green). **B: Alpha diversity by Ploidy.** Alpha-diversity, measured by Chao1 and Shannon diversity Index, plotted for switchgrass ploidy levels with Tetraploid - Four (pink), Hybrid (maroon), and Octoploid - Eight (olive). **C: Alpha diversity by Genetic cluster.** Alpha-diversity, measured by Chao1 and Shannon diversity Index, plotted for switchgrass genetic clusters with North (red), South (dark blue), Northeast (beige), West (light blue), and East (black).



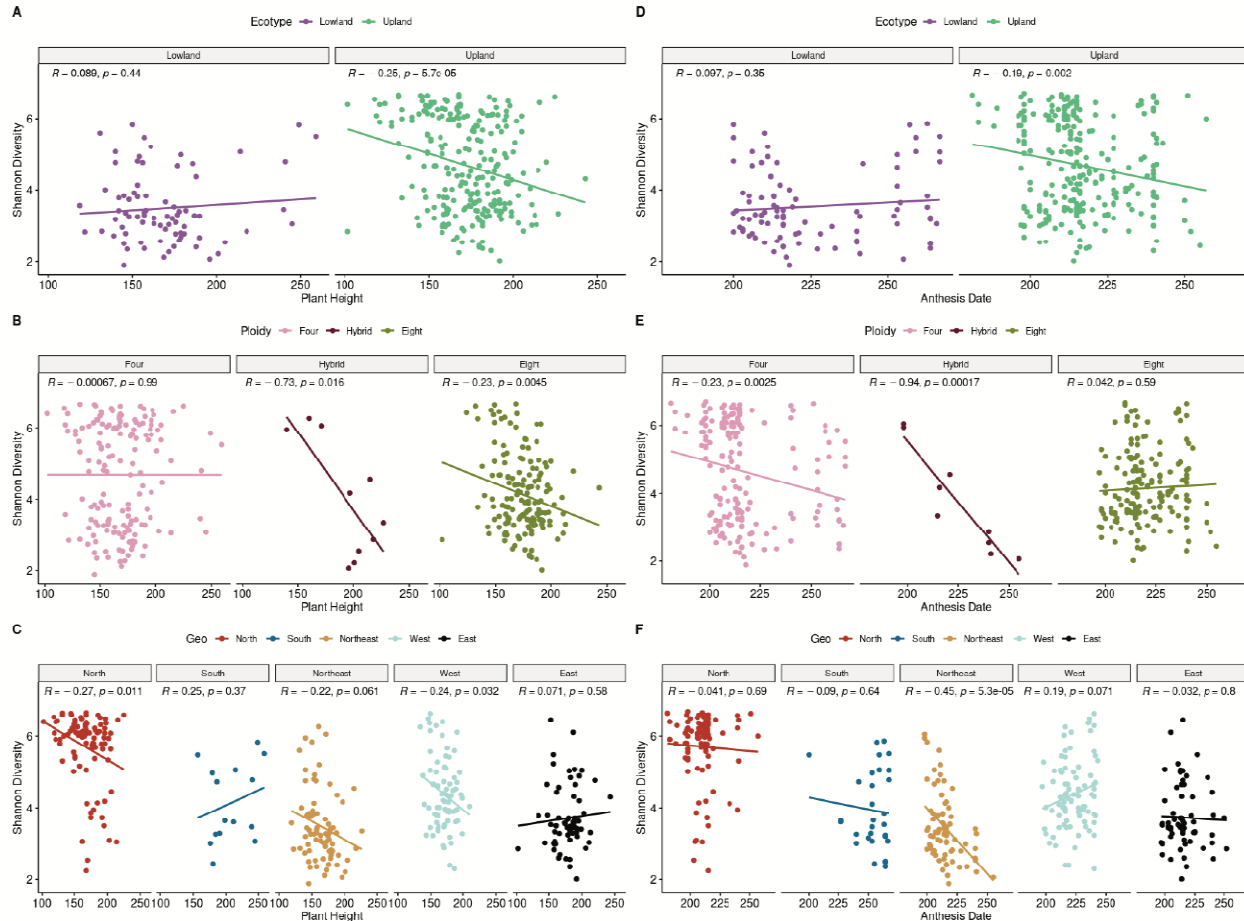

761  
762  
763  
764  
765  
766  
767  
768  
769  
770  
771

**Figure 2:**

**Relationships between Shannon diversity and plant height.** **A: Ecotype:** plotted for switchgrass ecotypes with Lowland (purple), Both (brown), and Upland (green). **B: Ploidy:** plotted for switchgrass ploidy levels with Tetraploid - Four (pink), Hybrid (maroon), and Octoploid - Eight (olive). **C: Genetic cluster:** plotted for switchgrass genetic clusters with North (red), South (dark blue), Northeast (beige), West (light blue), and East (black). **Relationships between Shannon diversity and anthesis date.** **D: Ecotype:** plotted for switchgrass ecotypes with Lowland (purple), Both (brown), and Upland (green). **E: Ploidy:** plotted for switchgrass ploidy levels with Tetraploid - Four (pink), Hybrid (maroon), and Octoploid - Eight (olive). **F: Genetic cluster:** plotted for switchgrass genetic clusters with North (red), South (dark blue), Northeast (beige), West (light blue), and East (black).

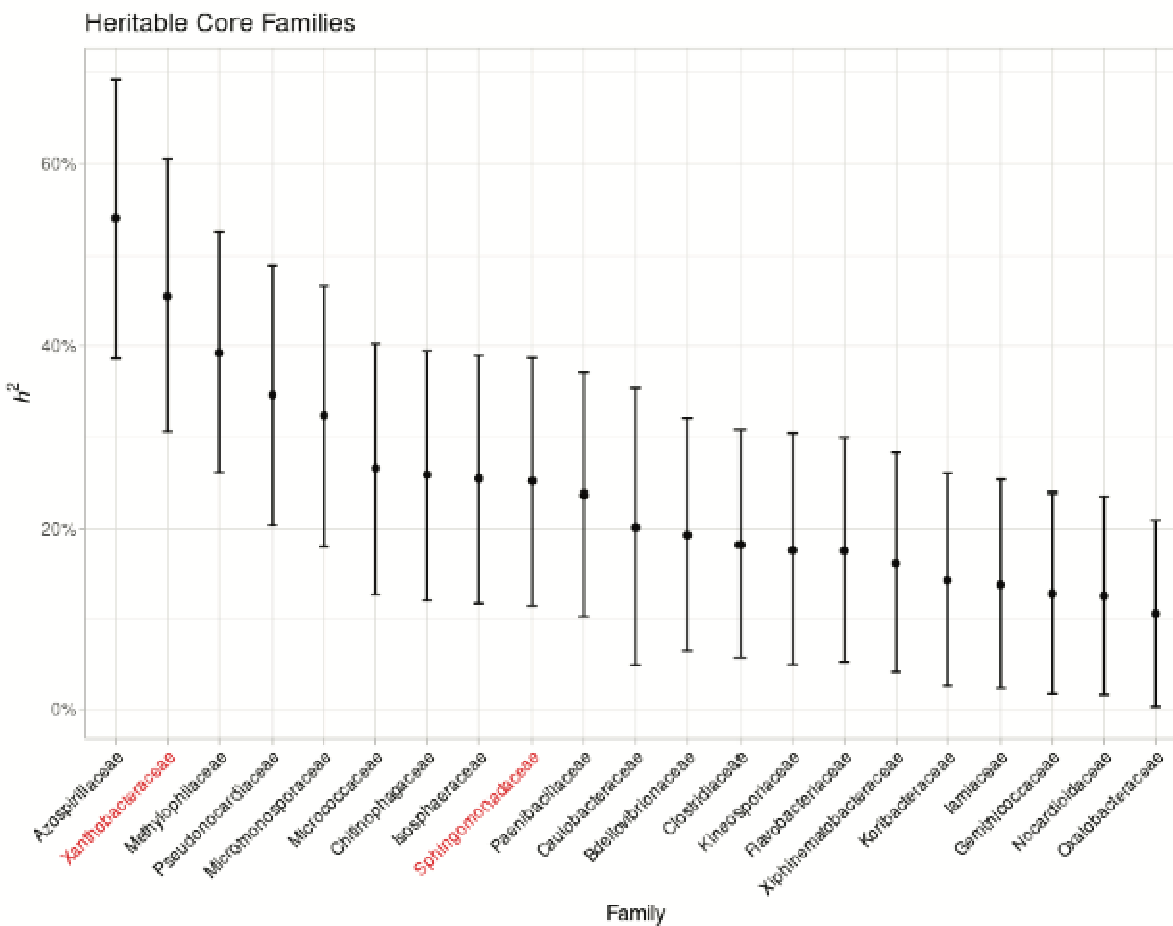

772  
 773 **Figure 3:**  
 774 **Heritability estimates for bacterial families in the switchgrass rhizosphere.** For 110 bacterial families that were  
 775 observed in more than 10% of switchgrass samples, narrow-sense heritability ( $h^2$ ) was calculated using a mixed  
 776 linear model. 21 families had heritability estimates with standard error greater than zero. Families observed in more  
 777 than 90% of our samples are represented in red.  
 778

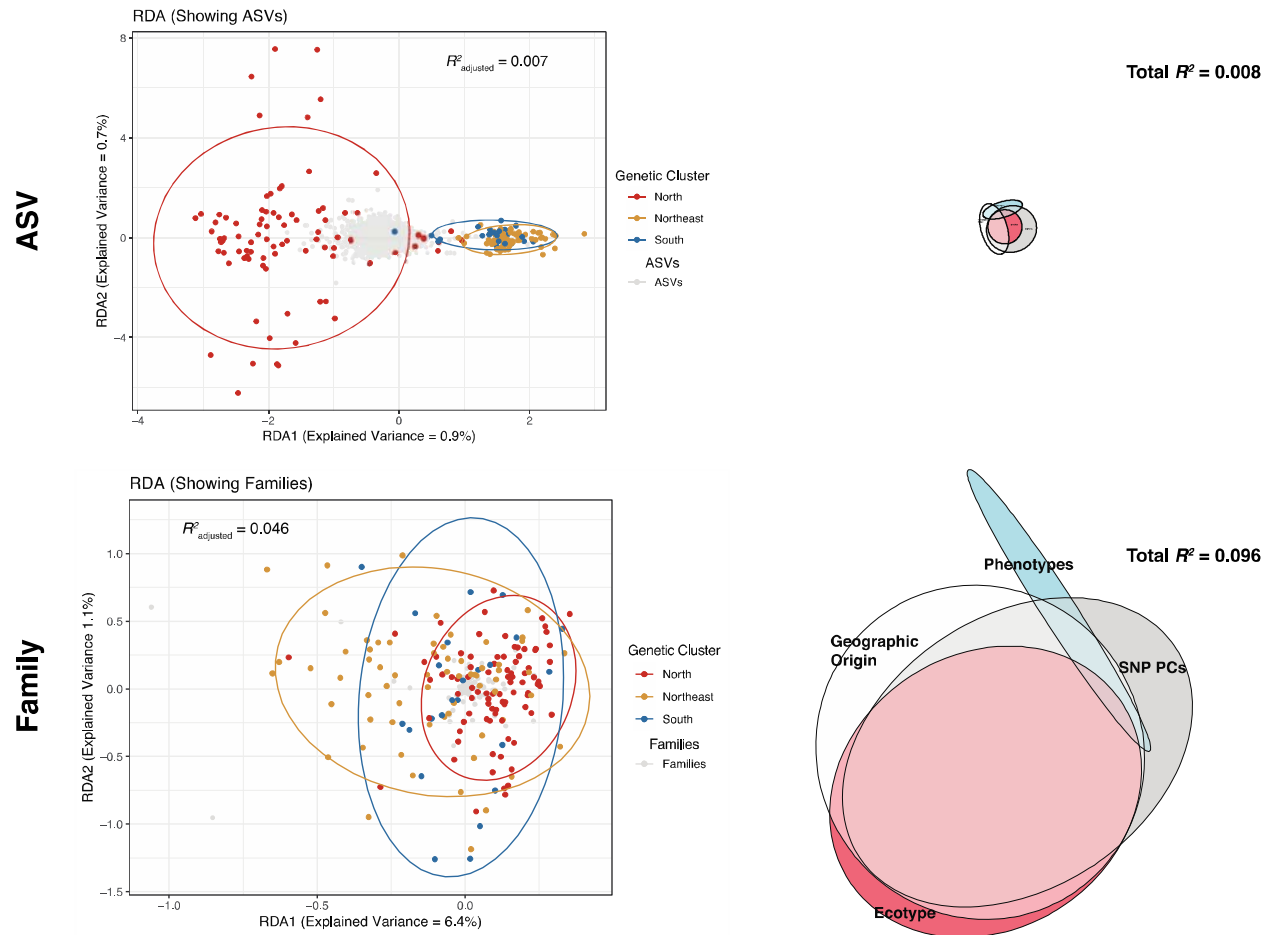

779  
780  
781  
782  
783  
784  
785  
786  
787

**Figure 4:**  
**Redundancy Analyses and Variance Partitioning.** **A:** Results of RDA analysis presenting amplicon sequence variants (Grey) and the North (Red), Northeast (Beige), and South (Blue) genetic clusters. **B:** Results of variance partitioning analysis for ASVs presenting Ecotype (Red), SNP PCs (Grey), Phenotypes (Blue), and Geographic Origin (White). **C:** Results of RDA analysis presenting rhizosphere bacterial families (Grey) and the North (Red), Northeast (Beige), and South (Blue) genetic clusters. **D:** Results of variance partitioning analysis for rhizosphere bacterial families presenting Ecotype (Red), SNP PCs (Grey), Phenotypes (Blue), and Geographic Origin (White).

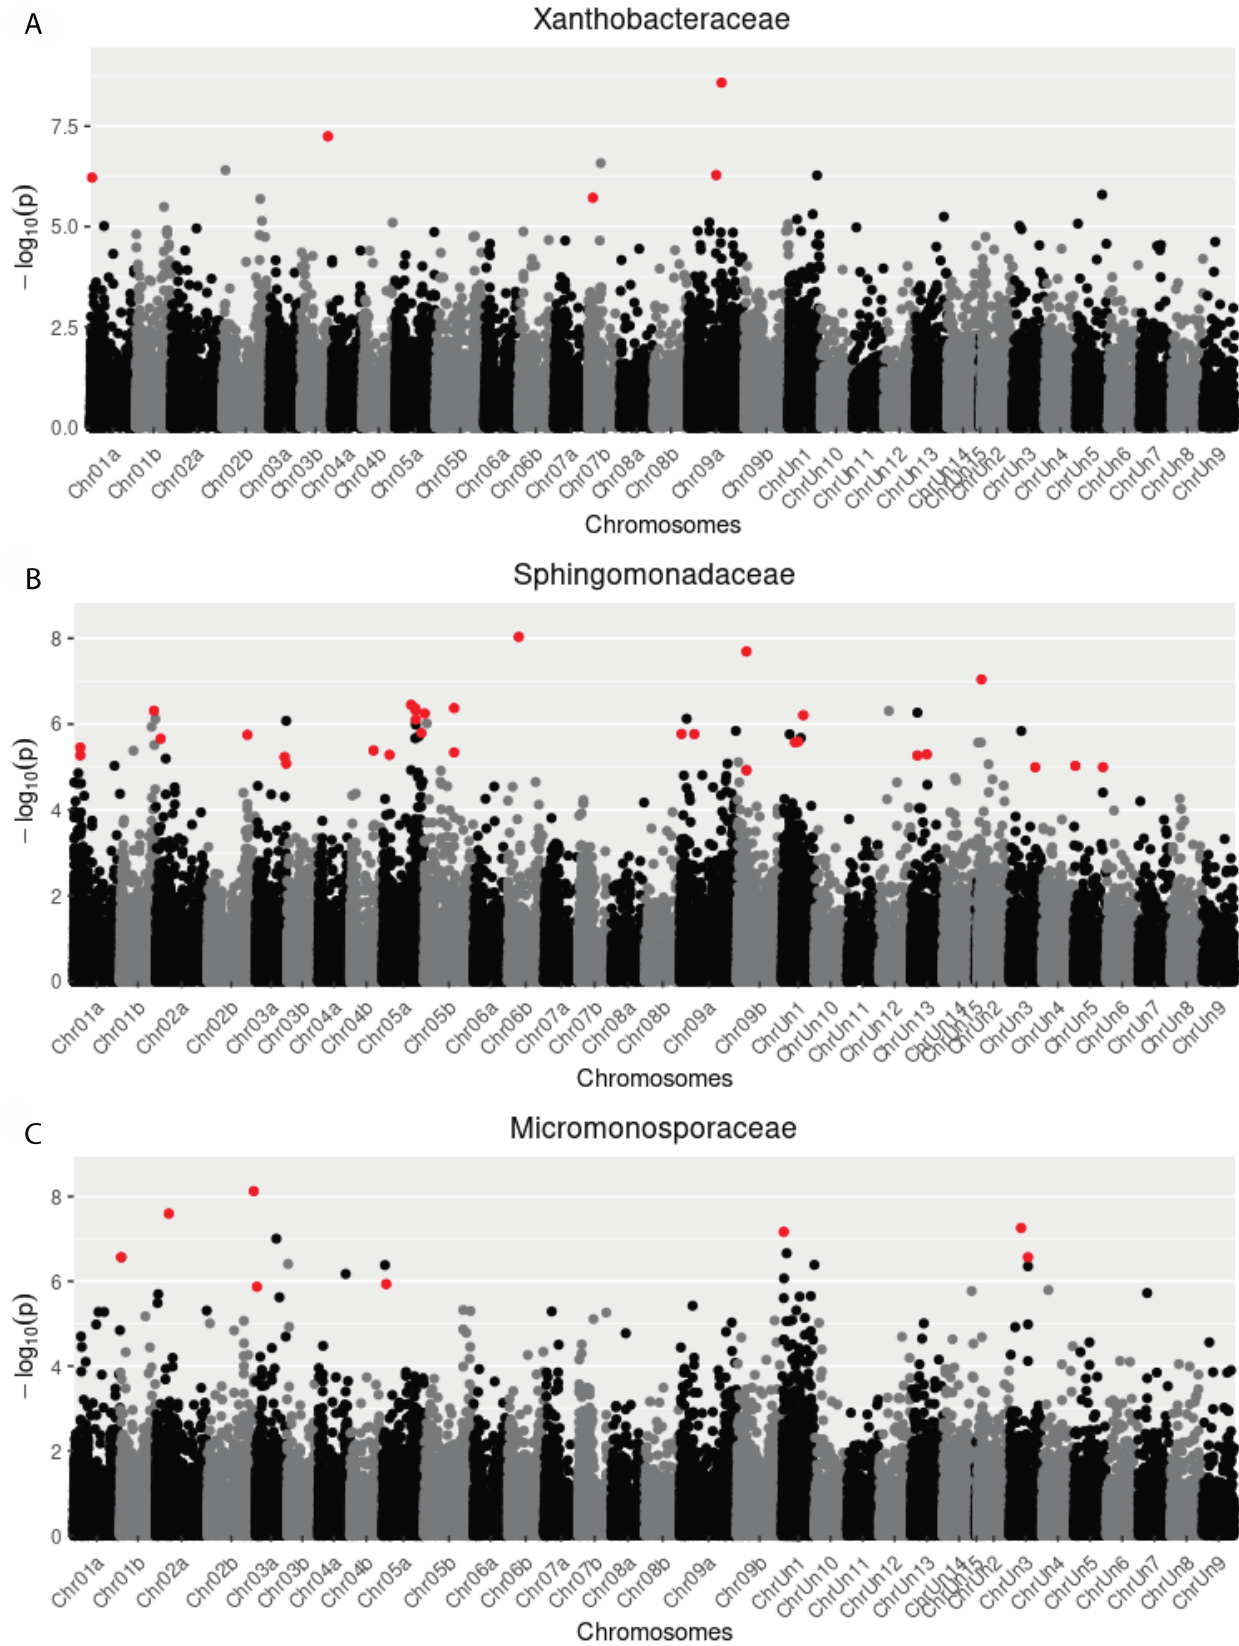

788  
789

Figure 5:

790 **Genome-wide association study (GWAS):** **A:** Manhattan plot presenting significant SNPs (Red) associated with  
791 Xanthobacteraceae rhizosphere abundance. **B:** Manhattan plot presenting significant SNPs (Red) associated with  
792 Sphingomonadaceae rhizosphere abundance. **C:** Manhattan plot presenting significant SNPs (Red) associated with  
793 Micromonosporaceae rhizosphere abundance.

794  
795 Supplemental Figures:  
796

### Switchgrass Genetic Clusters

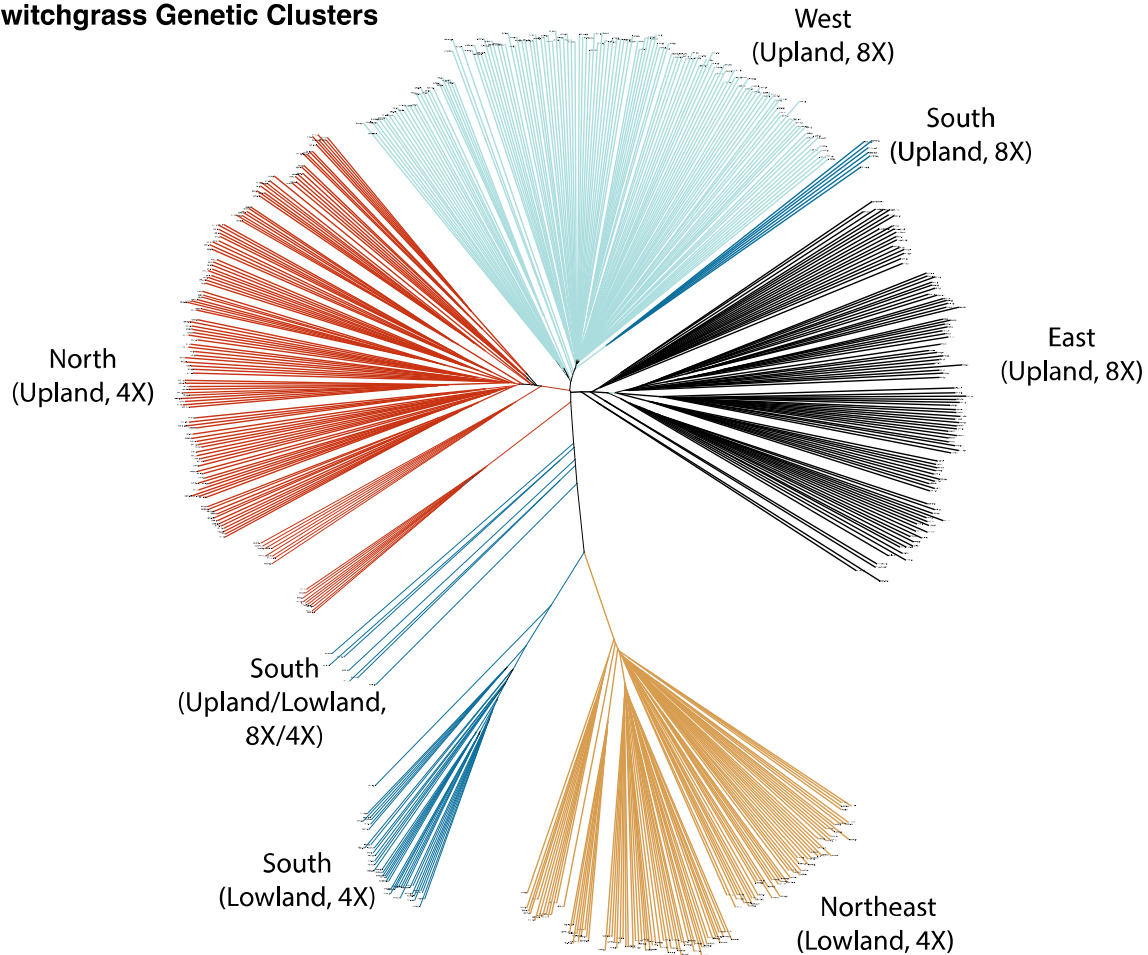

797  
798 **Supplemental Figure 1:**  
799 **Phylogenetic analysis:** Results of phylogenetic analysis based on exome capture dataset from Evans et al. 2018 with  
800 switchgrass genetic clusters colored as North (red), South (dark blue), Northeast (beige), West (light blue), and East  
801 (black).  
802

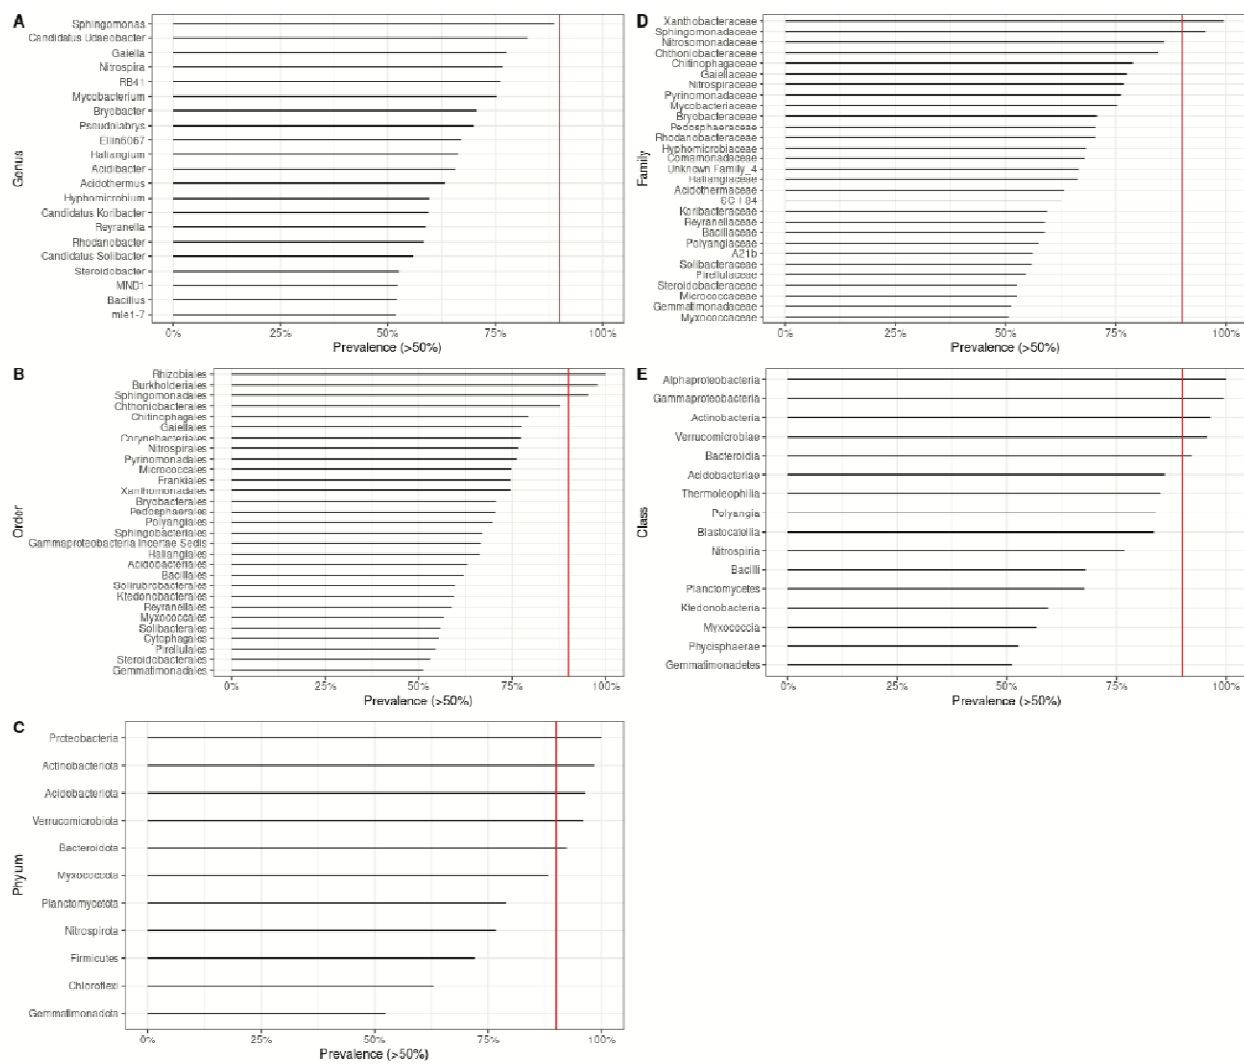

803  
 804 **Supplemental Figure 2:**  
 805 **Prevalence of rhizosphere bacterial taxa:** The prevalence of rhizosphere bacterial taxa in greater than 50% of  
 806 switchgrass samples shown for **A:** Genus, **B:** Family, **C:** Order, **D:** Class, and **E:** Phylum. The 90% occupancy  
 807 threshold for each group is indicated by a vertical red line.  
 808

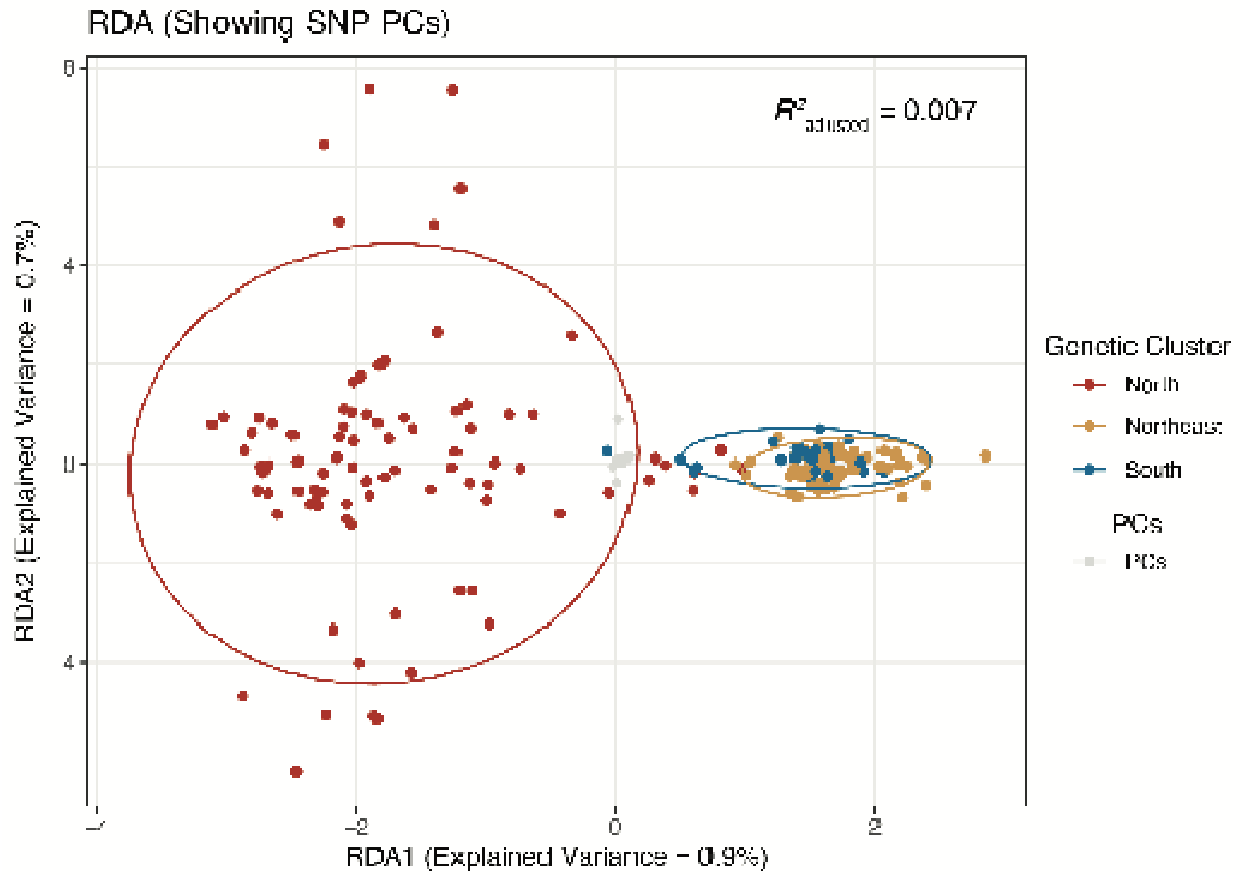

809  
810  
811  
812  
813

**Supplemental Figure 3:**

**Redundancy Analyses (PCs):** Results of RDA analysis presenting SNP PCs (grey) and the North (red), Northeast (beige), and South (dark blue) genetic clusters.





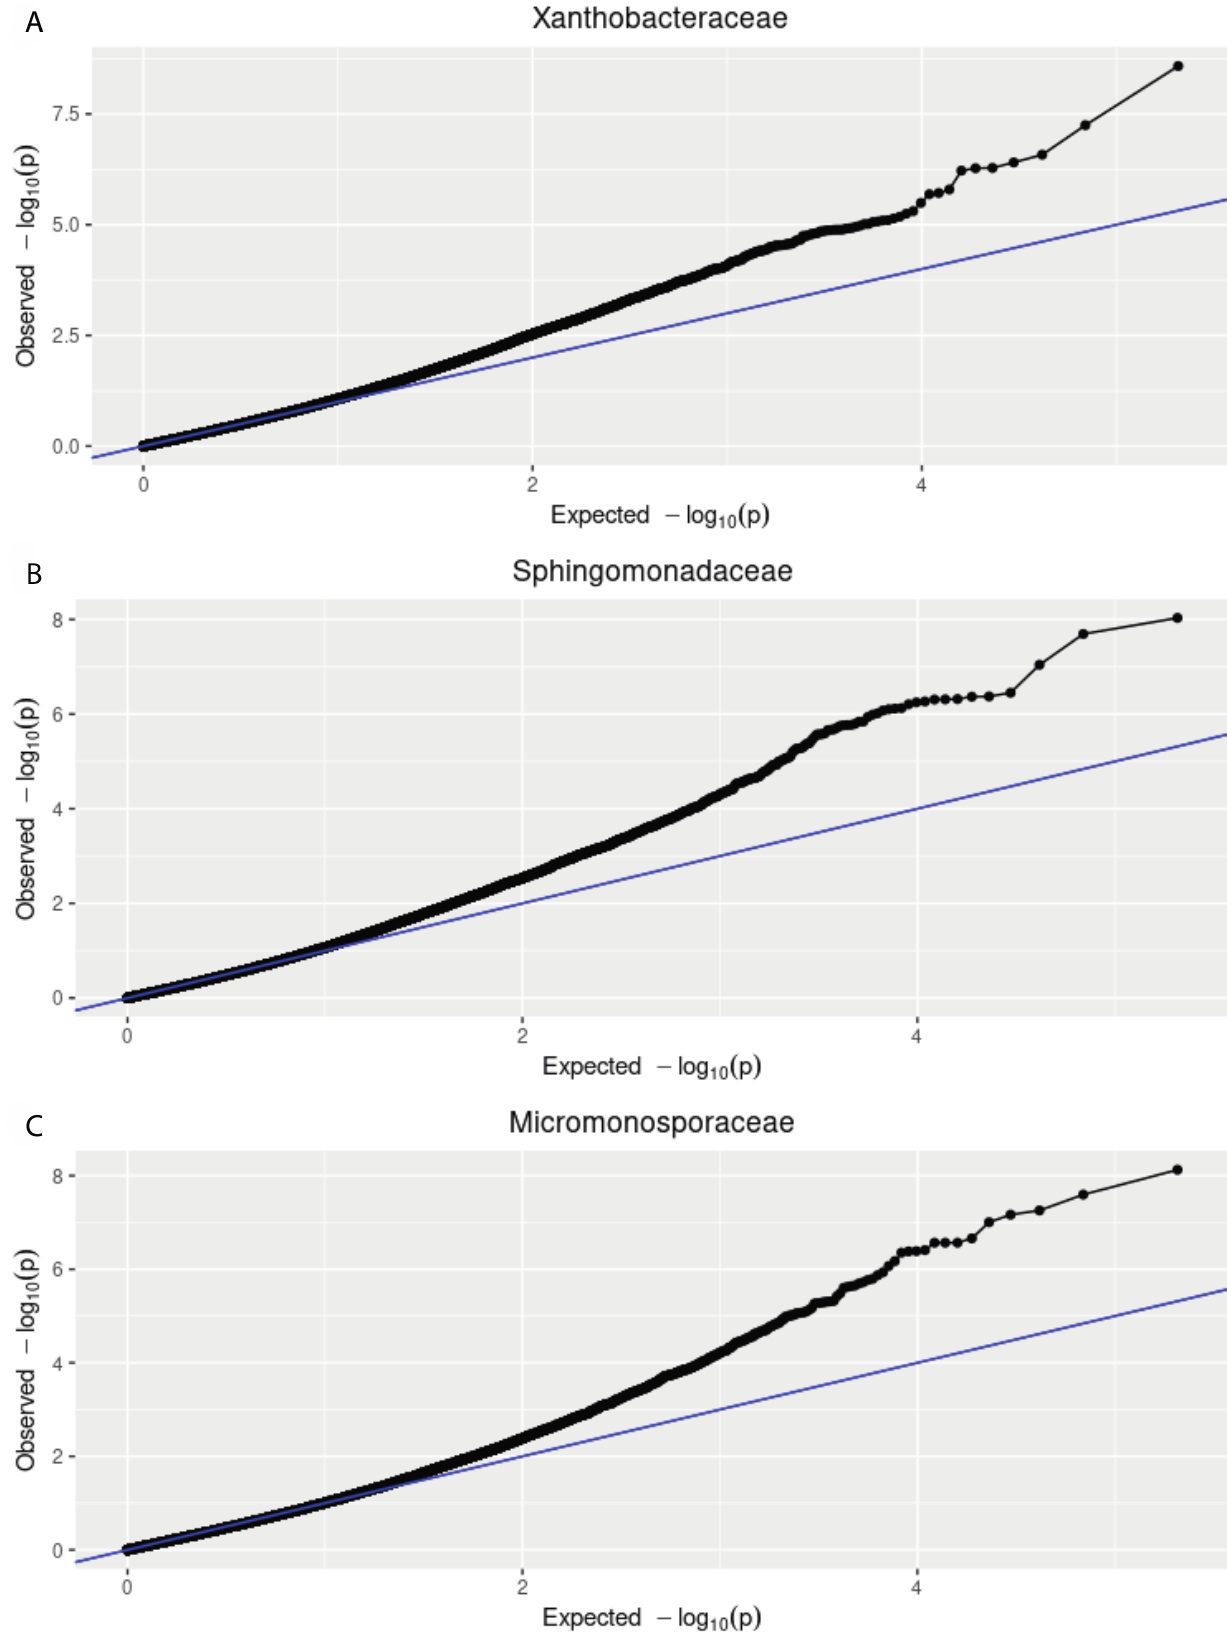

819  
820

*Supplemental Figure 5:*

821 **Genome-wide association study (GWAS): A:** QQ plot presenting significant SNPs (red) associated with  
 822 Xanthobacteraceae rhizosphere abundance. **B:** QQ plot presenting significant SNPs (red) associated with  
 823 Sphingomonadaceae rhizosphere abundance. **C:** QQ plot presenting significant SNPs (red) associated with  
 824 Micromonosporaceae rhizosphere abundance.

825  
 826 Supplemental Tables:  
 827

| Accession    | Observed | Chao1   | se.chao1  | ACE     | se.ACE   | Shannon   | Simpson  | InvSimpson | Fisher    |
|--------------|----------|---------|-----------|---------|----------|-----------|----------|------------|-----------|
| Blackwell.01 |          |         | 23.394779 | 354.272 | 8.002603 | 5.3424889 |          |            | 132.26882 |
| .2           | 284      | 369.56  | 1         | 918     | 93       | 2         | 0.993834 | 162.179695 | 2         |
|              |          |         | 1.4225048 | 82.8502 | 4.475540 |           |          |            | 21.150173 |
| Blackwell.01 | 82       | 82.75   | 7         | 641     | 56       | 4.215349  | 0.983254 | 59.715753  | 3         |
|              |          | 157.090 | 13.659610 | 145.800 | 5.671623 | 4.5370031 |          |            | 40.732534 |
| Blackwell.02 | 132      | 909     | 4         | 369     | 98       | 7         | 0.986778 | 75.6315232 | 1         |
|              |          | 128.111 | 4.9758218 | 125.653 | 4.950851 | 4.5327523 |          |            | 36.441366 |
| Blackwell.03 | 122      | 111     | 9         | 226     | 1        | 3         | 0.986856 | 76.0803408 | 1         |
|              |          | 196.576 | 9.7584752 | 194.578 | 5.869440 | 4.8451448 |          |            | 61.407364 |
| Blackwell.04 | 175      | 923     | 9         | 467     | 07       | 3         | 0.990238 | 102.438025 | 3         |
|              |          |         |           |         | 0.960768 | 2.3923152 |          |            | 2.1091676 |
| Blackwell.05 | 13       | 13      | 0         | 13      | 92       | 4         | 0.899676 | 9.96770464 | 9         |
|              |          | 232.689 | 12.043015 | 226.089 | 5.819401 | 5.0021228 |          |            | 76.920499 |
| Blackwell.06 | 203      | 655     | 2         | 895     | 91       | 9         | 0.991456 | 117.041199 | 8         |
| Carthage.01  |          |         |           |         | 2.229670 | 3.3590414 |          |            | 7.0549535 |
| .2           | 35       | 35      | 0         | 35      | 06       | 2         | 0.960402 | 25.2538007 | 3         |
|              |          | 33.3333 | 0.9230919 | 34.6522 | 2.343733 | 3.1504598 |          |            | 6.5554321 |
| Carthage.01  | 33       | 333     | 6         | 222     | 59       | 5         | 0.94669  | 18.7582067 | 1         |
|              |          |         | 0.4923659 | 33.4661 | 1.792922 | 3.2537473 |          |            | 6.5554321 |
| Carthage.02  | 33       | 33      | 6         | 103     | 95       | 8         | 0.95452  | 21.9876869 | 1         |
|              |          |         | 0.4946522 | 47.1796 | 3.028009 | 3.6323294 |          |            | 10.234894 |
| Carthage.03  | 47       | 47      | 5         | 516     | 26       | 5         | 0.969314 | 32.588151  | 7         |
|              |          |         | 0.4898979 |         | 1.147710 | 2.9982538 |          |            | 4.6508688 |
| Carthage.04  | 25       | 25      | 5         | 26.12   | 2        | 8         | 0.941572 | 17.1150818 | 2         |
|              |          |         |           |         | 0.966091 | 2.4329510 |          |            | 2.5030219 |
| Carthage.05  | 15       | 15      | 0         | 15      | 78       | 3         | 0.900104 | 10.0104108 | 3         |
|              |          |         | 0.2472676 | 46.3328 | 2.872233 | 3.5933987 |          |            | 9.9583175 |
| Carthage.06  | 46       | 46      | 8         | 042     | 76       | 1         | 0.967658 | 30.9195473 | 9         |
| CaveinRock.  |          | 241.217 | 22.700631 | 225.941 | 7.275428 | 4.7746719 |          |            | 63.520861 |
| 01           | 179      | 391     | 8         | 994     | 77       | 3         | 0.988734 | 88.7626487 | 7         |
| CaveinRock.  |          |         |           |         | 2.222875 | 3.3010188 |          |            | 6.8040632 |
| 03           | 34       | 34      | 0         | 34      | 72       | 5         | 0.957934 | 23.7721676 | 3         |
| CaveinRock.  |          |         |           |         |          | 2.0135421 |          |            |           |
| 04           | 11       | 11      | 0         | NA      | NA       | 4         | 0.816972 | 5.46364491 | 1.7290385 |
| CaveinRock.  |          |         | 1.4216995 | 52.5269 | 3.487480 | 3.5505624 |          |            |           |
| 06           | 51       | 51.75   | 5         | 868     | 35       | 7         | 0.964654 | 28.2917445 | 11.361576 |
| CaveinRock.  |          |         |           |         | 1.589438 | 2.5947938 |          |            | 3.3283031 |
| 07           | 19       | 19      | 0         | 19      | 83       | 6         | 0.906036 | 10.6423737 | 1         |
| CaveinRock.  |          |         |           |         | 2.026144 | 2.3547577 |          |            | 3.3283031 |
| 08           | 19       | 19      | 0         | 19      | 9        | 9         | 0.872682 | 7.85434895 | 1         |
|              |          | 756.309 | 50.450369 | 725.718 | 14.55862 |           |          |            | 342.72404 |
| Dacotah.02   | 468      | 278     | 9         | 703     | 1        | 5.9079517 | 0.996468 | 283.125708 | 4         |
|              |          | 1277.42 | 77.663680 | 1308.02 | 17.00212 | 6.3979261 |          |            | 916.05373 |
| Dacotah.03   | 676      | 424     | 8         | 044     | 02       | 8         | 0.998092 | 524.109015 | 4         |

|            |     |         |           |         |          |           |          |            |           |
|------------|-----|---------|-----------|---------|----------|-----------|----------|------------|-----------|
|            |     | 624.741 | 38.926336 | 620.717 | 13.96987 | 5.7900730 |          |            | 276.56328 |
| Dacotah.04 | 423 | 573     | 4         | 968     | 77       | 9         | 0.99604  | 252.525253 | 7         |
|            |     | 674.666 | 37.119183 | 708.293 | 15.52590 | 5.9068336 |          |            | 337.92165 |
| Dacotah.05 | 465 | 667     | 8         | 812     | 06       | 3         | 0.996498 | 285.551114 | 5         |
|            |     | 1104.38 | 65.879614 | 1139.99 | 17.53679 | 6.2936985 |          |            | 713.14069 |
| Dacotah.07 | 625 | 71      | 1         | 626     | 3        | 4         | 0.997828 | 460.405157 | 8         |
|            |     |         | 221.95544 | 2679.47 | 13.78880 | 6.6552991 |          |            | 2260.3525 |
| Dacotah.08 | 828 | 2680.32 | 6         | 419     | 54       | 8         | 0.9986   | 714.285714 | 9         |
|            |     |         |           |         | 2.304418 | 3.0658291 |          |            | 5.5839911 |
| ECS.1.05   | 29  | 29      | 0         | 29      | 54       | 5         | 0.942692 | 17.4495707 | 2         |
|            |     |         | 2.2998855 | 20.5890 | 1.683910 |           |          |            | 3.1175139 |
| ECS.1.06   | 18  | 19      | 8         | 909     | 07       | 2.5683886 | 0.914612 | 11.7112475 | 4         |
|            |     |         |           |         | 2.788866 | 3.6244770 |          |            | 9.6838002 |
| ECS.12.01  | 45  | 45      | 0         | 45      | 76       | 8         | 0.969748 | 33.0556657 | 4         |
|            |     | 183.769 | 17.238614 | 165.971 | 5.763388 | 4.6236123 |          |            |           |
| ECS.12.02  | 148 | 231     | 5         | 715     | 15       | 2         | 0.987436 | 79.5924865 | 47.997644 |
|            |     |         |           | 92.3956 | 4.726708 |           |          |            |           |
| ECS.12.03  | 92  | 92.2    | 0.6211081 | 644     | 63       | 4.2780631 | 0.983272 | 59.7800096 | 24.694105 |
|            |     | 135.312 | 1.6025110 | 136.017 | 4.915418 | 4.6706732 |          |            | 41.613637 |
| ECS.12.05  | 134 | 5       | 7         | 432     | 19       | 1         | 0.988754 | 88.9205051 | 9         |
|            |     |         | 0.6211025 | 91.4664 | 4.756108 | 4.3463872 |          |            | 24.331359 |
| ECS.12.07  | 91  | 91.2    | 9         | 354     | 06       | 3         | 0.985614 | 69.5120256 | 3         |
|            |     | 126.583 | 5.4482389 | 125.221 | 5.179940 | 4.4153944 |          |            | 35.190936 |
| ECS.2.02   | 119 | 333     | 4         | 544     | 28       | 3         | 0.984792 | 65.7548659 | 6         |
|            |     | 290.454 |           | 272.205 | 6.573931 | 5.1440032 |          |            |           |
| ECS.2.03   | 235 | 546     | 18.730274 | 486     | 01       | 3         | 0.992416 | 131.85654  | 96.81155  |
|            |     |         | 0.7360481 | 81.5651 | 4.487695 | 4.1634070 |          |            | 20.806009 |
| ECS.2.04   | 81  | 81.25   | 2         | 007     | 33       | 4         | 0.981912 | 55.285272  | 8         |
|            |     |         | 0.3817603 | 76.5797 | 4.342524 |           |          |            | 19.113207 |
| ECS.2.06   | 76  | 76.1    | 9         | 785     | 45       | 4.0168183 | 0.977958 | 45.3679339 | 7         |
|            |     |         | 2.3326329 | 67.2962 | 3.995960 | 4.0140341 |          |            | 16.184541 |
| ECS.2.07   | 67  | 68      | 5         | 963     | 89       | 7         | 0.979062 | 47.7600535 | 4         |
|            |     |         | 0.2472066 | 45.3072 | 2.933789 | 3.5627293 |          |            | 9.6838002 |
| ECS.10.01  | 45  | 45      | 2         | 902     | 86       | 5         | 0.967504 | 30.7730182 | 4         |
|            |     |         |           |         | 1.624807 | 2.9845207 |          |            | 4.6508688 |
| ECS.10.03  | 25  | 25      | 0         | 25      | 68       | 5         | 0.940842 | 16.9038845 | 2         |
|            |     |         | 4.5993925 | 32.8037 | 2.514591 | 3.0079953 |          |            |           |
| ECS.10.07  | 31  | 34      | 4         | 5       | 17       | 2         | 0.937756 | 16.0658055 | 6.0650427 |
|            |     |         | 0.4909902 | 28.2733 | 2.356810 | 3.0237944 |          |            | 5.3470387 |
| ECS.10.08  | 28  | 28      | 5         | 113     | 57       | 5         | 0.943754 | 17.7790421 | 8         |
|            |     |         |           |         | 3.089571 | 3.5389183 |          |            | 9.4113548 |
| ECS.10.09  | 44  | 44      | 0         | 44      | 9        | 4         | 0.966258 | 29.6366546 | 7         |
|            |     |         | 2.3232382 | 39.4975 | 2.415816 | 3.3910601 |          |            | 7.8209646 |
| ECS.10.10  | 38  | 39      | 4         | 37      | 29       | 4         | 0.961654 | 26.0783393 | 9         |
|            |     | 117.833 | 1.2604964 | 118.395 | 4.950770 | 4.5256214 |          |            | 34.366727 |
| ECS.11.01  | 117 | 333     | 7         | 017     | 42       | 5         | 0.987064 | 77.3036487 | 8         |
|            |     |         | 0.0988571 | 44.4333 | 2.851068 | 3.5181090 |          |            | 9.4113548 |
| ECS.11.02  | 44  | 44      | 1         | 048     | 81       | 1         | 0.96517  | 28.7108814 | 7         |
|            |     |         |           |         | 2.053959 | 3.2729350 |          |            | 6.3090836 |
| ECS.11.04  | 32  | 32      | 0         | 32      | 59       | 9         | 0.957414 | 23.4818955 | 3         |
|            |     |         |           |         | 1.337712 | 2.6862938 |          |            | 3.3283031 |
| ECS.11.05  | 19  | 19      | 0         | 19      | 11       | 4         | 0.92127  | 12.7016385 | 1         |

|              |     |         |           |         |           |           |           |            |           |           |
|--------------|-----|---------|-----------|---------|-----------|-----------|-----------|------------|-----------|-----------|
| ECS.11.07    | 157 | 218.875 | 25.182649 | 196.417 | 6.860286  | 4.5762160 |           |            |           | 52.304464 |
|              |     |         | 8         | 512     | 26        | 5         | 0.986162  | 72.2647782 |           | 6         |
| HighTide.02  | 11  | 11      | 0         | NA      | NA        | 1         | 0.86129   | 7.20928556 | 1.7290385 |           |
|              |     |         |           |         | 1.345185  | 2.8546305 |           |            | 3.7583769 |           |
| HighTide.03  | 21  | 21      | 0         | 21      | 42        | 9         | 0.9339    | 15.128593  | 1         |           |
|              |     |         |           |         | 1.788854  | 2.6534529 |           |            | 3.5419457 |           |
| HighTide.05  | 20  | 20      | 0         | 20      | 38        | 5         | 0.913368  | 11.5430788 | 8         |           |
|              |     |         |           |         | 0.953462  | 2.0604604 |           |            |           |           |
| HighTide.09  | 11  | 11      | 0         | 11      | 59        | 1         | 0.848558  | 6.60318802 | 1.7290385 |           |
|              |     |         |           |         | 0.968245  | 2.5352006 |           |            | 2.7047898 |           |
| HighTide.10  | 16  | 16      | 0         | 16      | 84        | 8         | 0.909588  | 11.0604787 | 6         |           |
|              |     |         |           |         | 5.7942620 | 136.481   | 5.060855  | 4.6272811  | 40.732534 |           |
| Kanlow.01    | 132 | 139.8   | 5         | 022     | 93        | 3         | 0.988286  | 85.3679358 | 1         |           |
|              |     |         |           |         | 59.2239   | 3.562309  | 3.8346694 |            | 13.710755 |           |
| Kanlow.02    | 59  | 59      | 0.1652482 | 335     | 36        | 8         | 0.974376  | 39.0259132 | 8         |           |
|              |     |         | 2.3277386 | 48.5768 | 3.106327  | 3.6482240 |           |            | 10.513519 |           |
| Kanlow.03    | 48  | 49      | 8         | 655     | 2         | 8         | 0.970032  | 33.3689269 | 9         |           |
|              |     |         |           |         | 2.034190  | 3.0615609 |           |            | 5.5839911 |           |
| Kanlow.04    | 29  | 29      | 0         | 29      | 51        | 8         | 0.943474  | 17.6909741 | 2         |           |
|              |     |         |           |         | 6.234049  | 4.7330135 |           |            | 62.459927 |           |
| Kanlow.05    | 177 | 471     | 8.8938170 | 202.486 | 7         | 2         | 0.987688  | 81.2215725 | 9         |           |
|              |     |         | 5         | 714     | 2.304418  | 3.0572103 |           |            | 5.5839911 |           |
| Kanlow.06    | 29  | 29      | 0         | 29      | 54        | 4         | 0.944458  | 18.0043931 | 2         |           |
|              |     |         |           |         | 3.016620  | 3.2779203 |           |            | 8.3425609 |           |
| Kanlow.08    | 40  | 40      | 0         | 40      | 63        | 6         | 0.950638  | 20.2584984 | 6         |           |
|              |     |         |           |         | 1.951800  | 2.4982881 |           |            | 3.7583769 |           |
| Kanlow.10    | 21  | 21      | 0         | 21      | 15        | 9         | 0.87997   | 8.33125052 | 1         |           |
|              |     |         |           |         | 2.236067  | 3.3007340 |           |            | 7.3080809 |           |
| KY1625.01    | 36  | 36      | 0         | 36      | 98        | 1         | 0.955154  | 22.2985328 | 3         |           |
|              |     |         |           |         | 1.609630  | 2.8223172 |           |            |           |           |
| KY1625.02    | 22  | 22      | 0         | 22      | 11        | 1         | 0.930418  | 14.3715329 | 3.9775371 |           |
|              |     |         |           |         | 0.4885042 | 22.5871   | 1.832393  |            |           |           |
| KY1625.03    | 22  | 22      | 1         | 936     | 2         | 2.8498394 | 0.93646   | 15.7381177 | 3.9775371 |           |
|              |     |         |           |         | 2.3145502 | 28.1911   | 2.095781  | 3.0126158  | 5.1125109 |           |
| KY1625.04    | 27  | 28      | 5         | 385     | 78        | 9         | 0.944648  | 18.0661945 | 2         |           |
|              |     |         |           |         | 0.4952605 | 53.1403   | 3.309600  | 3.7910374  | 11.936998 |           |
| KY1625.06    | 53  | 53      | 6         | 509     | 16        | 2         | 0.974256  | 38.8440025 | 1         |           |
|              |     |         |           |         | 0.2465033 | 36.3734   | 2.316959  |            | 7.3080809 |           |
| KY1625.07    | 36  | 36      | 2         | 074     | 53        | 3.323476  | 0.957368  | 23.4565585 | 3         |           |
| Pathfinder.0 |     |         |           |         | 0.4894725 | 25.1111   | 1.066883  |            | 4.4238312 |           |
| 1            | 24  | 24      | 1         | 111     | 2         | 2.8738709 | 0.931104  | 14.5146308 | 1         |           |
| Pathfinder.0 |     |         |           |         | 0.4918693 | 31.3805   | 1.810100  | 3.2172318  |           |           |
| 2            | 31  | 31      | 8         | 41      | 82        | 1         | 0.952968  | 21.2621194 | 6.0650427 |           |
| Pathfinder.0 |     |         |           |         | 0.4960158 | 63.1347   | 3.615392  | 4.0034066  | 14.932265 |           |
| 3            | 63  | 63      | 7         | 518     | 81        | 9         | 0.979342  | 48.4073967 | 5         |           |
| Pathfinder.0 |     |         |           |         | 0.1653594 | 64.1680   | 3.910412  | 3.9565316  | 15.242462 |           |
| 4            | 64  | 64      | 6         | 336     | 95        | 2         | 0.97814   | 45.7456542 | 8         |           |
| Pathfinder.0 |     |         |           |         | 497.149   | 32.223917 | 481.942   | 10.68062   | 5.5926925 | 195.49644 |
| 5            | 354 | 254     | 2         | 64      | 65        | 1         | 0.995268  | 211.327134 | 5         |           |
| Pathfinder.0 |     |         |           |         | 0.0992619 | 68.3272   | 4.026175  | 3.9687013  | 16.502381 |           |
| 6            | 68  | 68      | 8         | 39      | 65        | 1         | 0.977834  | 45.1141388 | 4         |           |

|             |     |         |           |         |          |           |          |            |           |
|-------------|-----|---------|-----------|---------|----------|-----------|----------|------------|-----------|
|             |     | 266.675 |           | 262.922 | 6.869075 |           |          |            | 88.440004 |
| Shelter.01  | 222 | 676     | 15.401994 | 522     | 03       | 5.0768225 | 0.992116 | 126.839168 | 9         |
|             |     | 148.157 | 4.7464328 | 147.604 | 5.125929 | 4.6565174 |          |            | 44.758093 |
| Shelter.04  | 141 | 895     | 2         | 547     | 49       | 1         | 0.988222 | 84.9040584 | 5         |
|             |     | 107.111 | 4.9755659 | 105.959 | 5.042556 | 4.3239777 |          |            | 28.042367 |
| Shelter.05  | 101 | 111     | 3         | 064     | 18       | 8         | 0.984116 | 62.9564342 | 7         |
|             |     |         |           |         | 2.620767 | 3.4252775 |          |            | 7.8209646 |
| Shelter.06  | 38  | 38      | 0         | 38      | 26       | 8         | 0.962992 | 27.0211846 | 9         |
|             |     |         |           | 41.3370 | 2.594245 | 3.4853419 |          |            | 8.6065827 |
| Shelter.07  | 41  | 41      | 0.1646216 | 185     | 3        | 4         | 0.964894 | 28.4851592 | 4         |
|             |     |         |           |         | 2.247805 | 3.4858016 |          |            | 7.8209646 |
| Shelter.08  | 38  | 38      | 0         | 38      | 95       | 3         | 0.965726 | 29.1766354 | 9         |
|             |     |         |           |         | 0.980580 | 3.1696484 |          |            | 4.8804419 |
| Sunburst.01 | 26  | 26      | 0         | 26      | 68       | 6         | 0.955562 | 22.503263  | 6         |
|             |     |         |           |         | 1.615145 | 2.9328576 |          |            | 4.1993718 |
| Sunburst.02 | 23  | 23      | 0         | 23      | 71       | 3         | 0.94052  | 16.8123739 | 9         |
|             |     |         | 0.4890096 | 24.0864 | 1.483973 | 3.0044659 |          |            | 4.1993718 |
| Sunburst.04 | 23  | 23      | 5         | 198     | 93       | 3         | 0.946512 | 18.6957822 | 9         |
|             |     | 61.3333 | 0.9245561 | 61.5347 | 3.627977 | 3.9264577 |          |            | 14.317643 |
| Sunburst.05 | 61  | 333     | 5         | 21      | 36       | 1         | 0.977988 | 45.4297656 | 8         |
|             |     | 231.823 |           | 231.577 | 6.244902 | 4.9978561 |          |            | 77.506253 |
| Sunburst.06 | 204 | 529     | 11.04251  | 917     | 37       | 5         | 0.99154  | 118.20331  | 5         |
|             |     |         | 0.4923659 | 33.3279 | 2.307691 | 3.2662388 |          |            | 6.5554321 |
| Sunburst.07 | 33  | 33      | 6         | 766     | 93       | 2         | 0.956992 | 23.2514881 | 1         |
|             |     | 1300.36 | 84.349896 | 1313.73 | 17.21792 |           |          |            | 849.79393 |
| SW102.01    | 661 | 913     | 8         | 961     | 41       | 6.3621531 | 0.997996 | 499.001996 | 8         |
|             |     | 2380.54 | 191.69492 | 2405.20 | 15.69208 | 6.6029326 |          |            |           |
| SW102.02    | 798 | 688     | 1         | 226     | 59       | 9         | 0.998492 | 663.129974 | 1832.3246 |
|             |     | 758.794 | 47.138486 | 755.958 | 15.62673 | 5.9716331 |          |            | 369.39039 |
| SW102.03    | 484 | 393     | 3         | 608     | 43       | 7         | 0.99687  | 319.488818 | 3         |
|             |     | 793.045 | 43.863284 | 800.693 | 15.20757 |           |          |            |           |
| SW102.04    | 522 | 455     | 9         | 061     | 04       | 6.0783177 | 0.997264 | 365.497076 | 440.66336 |
|             |     | 1037.39 | 72.873095 | 1011.43 | 17.55745 | 6.1260082 |          |            | 518.14414 |
| SW102.05    | 557 | 823     | 3         | 725     | 61       | 5         | 0.997286 | 368.459838 | 6         |
|             |     | 545.011 | 31.403449 | 565.668 | 12.82308 | 5.6877861 |          |            | 236.27209 |
| SW102.06    | 391 | 111     | 6         | 334     | 41       | 8         | 0.995596 | 227.066303 | 9         |
|             |     |         | 2.2303578 | 77.2480 | 4.314111 | 4.0450301 |          |            | 19.113207 |
| SW109.01    | 76  | 77.5    | 1         | 166     | 34       | 7         | 0.97858  | 46.6853408 | 7         |
|             |     |         |           | 41.2737 | 2.709759 |           |          |            | 8.6065827 |
| SW109.02    | 41  | 41      | 0.2469324 | 255     | 07       | 3.4328486 | 0.961836 | 26.2027041 | 4         |
|             |     |         | 60.039323 | 973.887 | 18.10678 | 6.1203808 |          |            | 503.93733 |
| SW109.03    | 551 | 946     | 6         | 63      | 14       | 5         | 0.997308 | 371.471025 | 8         |
|             |     | 107.857 | 6.3350402 | 104.429 | 4.952243 | 4.3188250 |          |            | 27.662922 |
| SW109.04    | 100 | 143     | 3         | 098     | 42       | 3         | 0.984176 | 63.1951466 | 1         |
|             |     | 144.807 | 1.1265561 | 146.463 | 5.203400 |           |          |            | 46.134760 |
| SW109.05    | 144 | 692     | 4         | 757     | 52       | 4.7150251 | 0.989222 | 92.7815921 | 6         |
|             |     |         | 2.3261795 | 44.7873 | 2.485914 | 3.5940011 |          |            | 9.4113548 |
| SW109.06    | 44  | 45      | 1         | 431     | 29       | 9         | 0.968868 | 32.12129   | 7         |
|             |     | 458.222 | 33.945054 | 435.872 | 9.938721 | 5.4450033 |          |            | 160.03554 |
| SW109.07    | 317 | 222     | 8         | 385     | 04       | 3         | 0.994486 | 181.356547 | 6         |
|             |     | 82.8571 | 1.3946665 | 83.3088 | 4.499746 | 4.1874380 |          |            | 21.150173 |
| SW110.01    | 82  | 429     | 3         | 896     | 92       | 5         | 0.982186 | 56.1356237 | 3         |

|          |     |         |           |         |          |           |          |            |           |
|----------|-----|---------|-----------|---------|----------|-----------|----------|------------|-----------|
|          |     | 825.411 | 48.780317 | 772.572 | 14.60961 | 6.1071805 |          |            | 450.97506 |
| SW110.02 | 527 | 765     | 8         | 416     | 38       | 1         | 0.997406 | 385.505012 | 8         |
|          |     | 798.962 | 39.216606 | 830.401 | 15.60662 | 6.1457769 |          |            | 496.98551 |
| SW110.03 | 548 | 264     | 9         | 116     | 49       | 6         | 0.997474 | 395.882819 | 9         |
|          |     |         |           |         | 3.603239 |           |          |            | 14.013230 |
| SW110.04 | 60  | 60      | 0         | 60      | 28       | 3.8856459 | 0.97624  | 42.0875421 | 2         |
|          |     | 102.333 | 0.7585402 | 102.712 | 4.970449 | 4.3883292 |          |            | 28.423670 |
| SW110.05 | 102 | 333     | 2         | 117     | 37       | 4         | 0.98537  | 68.3526999 | 5         |
|          |     |         | 18.055641 | 293.765 | 7.543141 | 5.1113165 |          |            | 99.470471 |
| SW110.06 | 239 | 296.5   | 1         | 997     | 39       | 5         | 0.992004 | 125.062531 | 7         |
|          |     |         |           |         | 2.247805 | 3.4529103 |          |            | 7.8209646 |
| SW112.01 | 38  | 38      | 0         | 38      | 95       | 5         | 0.963954 | 27.7423293 | 9         |
|          |     |         | 0.4933771 | 38.2777 | 1.942205 | 3.4570502 |          |            | 7.8209646 |
| SW112.03 | 38  | 38      | 9         | 778     | 17       | 9         | 0.964716 | 28.3414579 | 9         |
|          |     |         | 1.2952673 | 57.4978 | 3.514503 | 3.7856122 |          |            | 13.111649 |
| SW112.04 | 57  | 57.5    | 1         | 983     | 42       | 5         | 0.972816 | 36.7863449 | 3         |
|          |     | 350.258 |           | 346.502 | 7.517912 | 5.4187040 |          |            | 139.50889 |
| SW112.05 | 293 | 621     | 16.574448 | 027     | 2        | 1         | 0.994522 | 182.548375 | 4         |
|          |     | 96.6666 |           | 96.1614 | 4.781793 | 4.3380314 |          |            | 25.793473 |
| SW112.06 | 95  | 667     | 2.2045363 | 415     | 98       | 2         | 0.9846   | 64.9350649 | 8         |
|          |     |         |           |         | 2.065116 | 3.3471525 |          |            | 6.8040632 |
| SW112.07 | 34  | 34      | 0         | 34      | 43       | 7         | 0.960178 | 25.1117473 | 3         |
|          |     | 998.937 | 55.867297 | 1045.23 | 17.58806 | 6.2536799 |          |            | 645.37092 |
| SW114.01 | 604 | 5       | 2         | 435     | 44       | 5         | 0.997728 | 440.140845 | 7         |
|          |     | 386.571 | 17.559381 | 375.829 | 7.422961 | 5.5696491 |          |            | 165.45875 |
| SW114.02 | 323 | 429     | 7         | 321     | 37       | 5         | 0.99548  | 221.238938 | 9         |
|          |     | 785.269 | 38.483632 | 812.478 | 15.36338 | 6.1335031 |          |            |           |
| SW114.03 | 542 | 231     | 2         | 316     | 57       | 9         | 0.997442 | 390.930414 | 483.37524 |
|          |     | 2838.97 | 254.66957 | 2870.12 | 16.33949 | 6.6092716 |          |            | 1946.6333 |
| SW114.04 | 807 | 222     | 4         | 007     | 29       | 9         | 0.998482 | 658.761528 | 9         |
|          |     | 495.142 | 29.713622 | 473.017 | 10.17081 | 5.6495506 |          |            | 205.95653 |
| SW114.05 | 364 | 857     | 5         | 313     | 75       | 8         | 0.995624 | 228.519196 | 8         |
|          |     | 88.6666 | 4.4908603 | 87.4215 | 4.615603 | 4.1227654 |          |            | 21.844089 |
| SW114.07 | 84  | 667     | 8         | 719     | 31       | 6         | 0.98023  | 50.5816894 | 3         |
|          |     |         | 0.0992509 | 67.2028 | 4.068502 | 3.9451636 |          |            | 16.184541 |
| SW114.08 | 67  | 67      | 3         | 536     | 12       | 1         | 0.976966 | 43.4140835 | 4         |
|          |     |         | 9.6567964 | 311.412 | 5.471092 | 5.4390300 |          |            | 132.26882 |
| SW115.01 | 284 | 311.55  | 4         | 824     | 91       | 6         | 0.994722 | 189.465707 | 2         |
|          |     | 2898.46 |           | 2884.04 | 13.35152 | 6.6685517 |          |            | 2419.7627 |
| SW115.02 | 837 | 61      | 249.31555 | 551     | 03       | 5         | 0.998622 | 725.689405 | 8         |
|          |     | 1466.80 |           | 1517.40 | 18.08361 | 6.4207845 |          |            | 1004.4280 |
| SW115.03 | 694 | 667     | 98.459852 | 599     | 24       | 8         | 0.998112 | 529.661017 | 4         |
|          |     | 822.007 | 44.036882 | 824.114 | 15.88440 | 6.1353856 |          |            | 485.61692 |
| SW115.04 | 543 | 092     | 6         | 014     | 11       | 3         | 0.997444 | 391.236307 | 7         |
|          |     |         | 20.348782 | 328.695 | 8.397857 | 5.1688365 |          |            |           |
| SW115.06 | 262 | 333.4   | 6         | 018     | 74       | 4         | 0.992    | 125        | 115.55145 |
|          |     |         | 126.47829 | 1753.29 | 17.03139 | 6.4819939 |          |            |           |
| SW116.02 | 728 | 1740.7  | 5         | 48      | 67       | 9         | 0.99825  | 571.428571 | 1204.2124 |
|          |     | 2207.68 | 167.39303 | 2281.26 | 15.23266 | 6.6061864 |          |            |           |
| SW116.03 | 798 | 085     | 3         | 827     | 02       | 1         | 0.998506 | 669.344043 | 1832.3246 |
|          |     | 1813.15 | 134.05897 | 1866.32 | 17.50813 | 6.4907478 |          |            | 1251.8622 |
| SW116.05 | 735 | 217     | 7         | 534     | 57       | 8         | 0.998256 | 573.394495 | 8         |

|          |     |         |           |         |          |           |          |            |           |
|----------|-----|---------|-----------|---------|----------|-----------|----------|------------|-----------|
|          |     |         | 59.339305 | 999.748 | 19.75033 | 6.0799997 |          |            |           |
| SW116.07 | 542 | 930.128 | 5         | 134     | 77       | 7         | 0.997072 | 341.530055 | 483.37524 |
|          |     | 1447.09 | 92.913821 | 1475.47 | 16.84388 | 6.4515826 |          |            | 1069.5348 |
| SW116.08 | 706 | 317     | 4         | 377     | 07       | 4         | 0.998206 | 557.413601 | 7         |
|          |     | 713.439 | 38.111760 | 787.171 | 16.89353 | 5.9544505 |          |            | 374.59615 |
| SW116.09 | 487 | 394     | 3         | 713     | 21       | 1         | 0.996664 | 299.760192 | 7         |
|          |     | 366.428 | 21.837920 | 368.981 | 8.768288 | 5.3205579 |          |            | 133.06144 |
| SW122.01 | 285 | 571     | 2         | 817     | 86       | 9         | 0.99364  | 157.232704 | 7         |
|          |     |         | 2.5842331 | 69.2796 | 4.071990 |           |          |            | 16.184541 |
| SW122.02 | 67  | 69      | 3         | 504     | 03       | 3.8993284 | 0.975504 | 40.8229915 | 4         |
|          |     | 413.838 | 15.307925 | 421.873 | 8.208279 |           |          |            | 195.49644 |
| SW122.03 | 354 | 71      | 4         | 189     | 85       | 5.6665673 | 0.995926 | 245.459008 | 5         |
|          |     | 131.666 | 8.0006549 | 126.221 | 5.170465 | 4.4950221 |          |            | 35.605862 |
| SW122.05 | 120 | 667     | 2         | 269     | 05       | 9         | 0.986472 | 73.920757  | 2         |
|          |     | 105.333 | 4.1251151 | 103.015 | 4.694652 | 4.4101508 |          |            | 28.423670 |
| SW122.06 | 102 | 333     | 3         | 706     | 7        | 5         | 0.985426 | 68.6153424 | 5         |
|          |     |         | 0.6206871 | 50.8760 | 3.353897 | 3.6167772 |          |            | 11.076870 |
| SW123.01 | 50  | 50.2    | 9         | 602     | 4        | 8         | 0.968186 | 31.4327026 | 8         |
|          |     |         | 0.4890096 | 23.5247 |          | 2.8611842 |          |            | 4.1993718 |
| SW123.02 | 23  | 23      | 5         | 303     | 1.7591   | 2         | 0.933426 | 15.020879  | 9         |
|          |     | 74.1111 |           | 75.6248 | 4.313761 | 3.8457485 |          |            | 17.467286 |
| SW123.04 | 71  | 111     | 3.1006765 | 977     | 74       | 6         | 0.972622 | 36.5256776 | 6         |
|          |     | 347.837 | 30.158536 | 331.011 | 8.837619 | 5.0507301 |          |            | 101.49086 |
| SW123.05 | 242 | 838     | 5         | 052     | 16       | 8         | 0.991038 | 111.582236 | 4         |
|          |     |         |           |         | 1.371988 | 3.3944481 |          |            | 6.8040632 |
| SW123.06 | 34  | 34      | 0         | 34      | 68       | 7         | 0.96294  | 26.9832704 | 3         |
|          |     |         | 4.3392619 | 100.045 | 4.810379 | 4.3102378 |          |            | 26.909539 |
| SW123.08 | 98  | 102.2   | 8         | 873     | 46       | 8         | 0.98365  | 61.1620795 | 2         |
|          |     |         |           |         | 2.701351 | 3.3406406 |          |            | 7.5634245 |
| SW123.09 | 37  | 37      | 0         | 37      | 01       | 8         | 0.958218 | 23.9337514 | 5         |
|          |     |         | 41.605091 | 761.943 | 15.29225 | 5.9929967 |          |            | 385.21207 |
| SW124.01 | 493 | 740     | 3         | 89      | 28       | 9         | 0.996924 | 325.097529 | 7         |
|          |     | 1292.58 | 81.263119 | 1335.18 | 17.82383 | 6.3785069 |          |            | 884.35986 |
| SW124.02 | 669 | 599     | 2         | 265     | 77       | 6         | 0.998028 | 507.099392 | 2         |
|          |     |         | 32.108803 | 498.286 | 10.69483 | 5.6405265 |          |            | 209.17261 |
| SW124.03 | 367 | 514     | 5         | 973     | 89       | 3         | 0.99553  | 223.713647 | 1         |
|          |     | 896.641 |           | 927.474 | 18.04594 | 6.0501102 |          |            | 448.89384 |
| SW124.04 | 526 | 026     | 58.341897 | 031     | 61       | 2         | 0.99703  | 336.700337 | 2         |
|          |     | 864.282 | 53.513328 | 924.436 | 18.47727 | 6.0417601 |          |            | 444.75983 |
| SW124.05 | 524 | 258     | 7         | 656     | 51       | 1         | 0.996972 | 330.250991 | 4         |
|          |     | 894.063 | 47.921104 | 960.870 | 18.78322 | 6.1707030 |          |            | 552.94865 |
| SW124.06 | 571 | 694     | 1         | 215     | 19       | 1         | 0.9974   | 384.615385 | 2         |
|          |     | 667.657 | 30.555908 | 697.271 | 14.53763 | 6.0207062 |          |            | 385.21207 |
| SW127.01 | 493 | 343     | 3         | 655     | 25       | 1         | 0.99709  | 343.642612 | 7         |
|          |     | 78.6666 | 2.2042773 | 78.9334 | 4.343880 | 4.0427247 |          |            | 19.448027 |
| SW127.03 | 77  | 667     | 9         | 648     | 99       | 9         | 0.978958 | 47.5239996 | 4         |
|          |     |         |           |         | 2.641022 | 3.5083058 |          |            | 8.3425609 |
| SW127.04 | 40  | 40      | 0         | 40      | 53       | 8         | 0.965962 | 29.3789294 | 6         |
|          |     | 196.111 | 7.8214233 | 194.488 | 5.495054 | 4.9072919 |          |            | 64.054480 |
| SW127.05 | 180 | 111     | 9         | 214     | 92       | 7         | 0.990942 | 110.399647 | 1         |
|          |     |         | 1.0591134 | 100.137 | 4.847002 | 4.3011674 |          |            | 27.285333 |
| SW127.06 | 99  | 99.6    | 4         | 629     | 36       | 3         | 0.982466 | 57.032052  | 1         |

|          |     |         |           |         |          |           |          |            |           |           |
|----------|-----|---------|-----------|---------|----------|-----------|----------|------------|-----------|-----------|
|          |     |         |           |         | 2.770274 | 3.5758062 |          |            |           | 9.1409943 |
| SW127.07 | 43  | 43      | 0         | 43      | 1        | 3         | 0.968068 | 31.3165477 |           | 4         |
|          |     | 392.484 | 20.896337 | 394.986 | 8.967902 | 5.4558879 |          |            |           | 155.60752 |
| SW128.01 | 312 | 375     | 4         | 534     | 23       | 1         | 0.99458  | 184.501845 |           | 3         |
|          |     | 150.076 |           | 154.143 | 5.565713 | 4.3789688 |          |            |           | 45.673925 |
| SW128.02 | 143 | 923     | 4.1280238 | 344     | 67       | 5         | 0.982148 | 56.0161327 |           | 4         |
|          |     |         | 0.4866642 | 19.3706 | 2.048086 | 2.3949373 |          |            |           | 3.3283031 |
| SW128.03 | 19  | 19      | 6         | 19      | 57       | 6         | 0.881198 | 8.41736671 |           | 1         |
|          |     |         |           |         | 3.903123 |           |          |            |           | 15.242462 |
| SW128.04 | 64  | 64      | 0         | 64      | 75       | 3.9237705 | 0.975576 | 40.9433344 |           | 8         |
|          |     |         |           |         | 2.215646 | 3.2258587 |          |            |           | 6.5554321 |
| SW128.05 | 33  | 33      | 0         | 33      | 84       | 1         | 0.952642 | 21.1157566 |           | 1         |
|          |     |         |           |         | 1.309307 | 2.2966286 |          |            |           | 2.3044443 |
| SW128.06 | 14  | 14      | 0         | 14      | 34       | 3         | 0.875366 | 8.02349279 |           | 1         |
|          |     | 861.389 | 53.433810 | 830.197 | 15.52612 | 6.0907763 |          |            |           | 453.06585 |
| SW129.01 | 528 | 831     | 7         | 982     | 43       | 3         | 0.997306 | 371.195249 |           | 4         |
|          |     | 538.780 | 29.045800 | 537.935 | 11.50814 | 5.7503007 |          |            |           |           |
| SW129.02 | 399 | 22      | 4         | 175     | 23       | 1         | 0.996034 | 252.143217 | 245.87671 |           |
|          |     | 828.436 | 49.952721 | 802.482 | 15.18090 |           |          |            |           | 438.62905 |
| SW129.03 | 521 | 975     | 2         | 816     | 18       | 6.0772823 | 0.997272 | 366.568915 |           | 3         |
|          |     | 911.059 | 54.945604 | 970.392 | 18.66920 | 6.1061963 |          |            |           |           |
| SW129.04 | 549 | 702     | 2         | 393     | 72       | 6         | 0.997182 | 354.861604 | 499.29176 |           |
|          |     |         | 42.080110 | 641.626 | 14.17244 | 5.7986501 |          |            |           | 279.25447 |
| SW129.05 | 425 | 646.625 | 5         | 598     | 85       | 5         | 0.996154 | 260.0104   |           | 9         |
|          |     | 1142.28 | 78.015661 | 1180.96 | 19.09270 | 6.2106376 |          |            |           | 621.49858 |
| SW129.06 | 596 | 347     | 3         | 226     | 1        | 2         | 0.997542 | 406.834825 |           | 1         |
|          |     |         |           |         | 2.190890 |           |          |            |           | 5.8233357 |
| SW31.01  | 30  | 30      | 0         | 30      | 23       | 3.0852854 | 0.945866 | 18.4726789 |           | 9         |
|          |     |         |           |         | 0.963624 | 2.2390348 |          |            |           | 2.3044443 |
| SW31.03  | 14  | 14      | 0         | 14      | 11       | 1         | 0.858202 | 7.05228565 |           | 1         |
|          |     |         |           |         | 1.839732 |           |          |            |           | 4.8804419 |
| SW31.04  | 26  | 26      | 0         | 26      | 42       | 3.0493745 | 0.946344 | 18.6372447 |           | 6         |
|          |     | 79.3333 | 0.9249512 | 79.4706 | 4.431733 | 4.1405708 |          |            |           | 20.123282 |
| SW31.05  | 79  | 333     | 5         | 263     | 96       | 2         | 0.98132  | 53.5331906 |           | 8         |
|          |     |         |           |         | 1.322875 | 2.5340035 |          |            |           | 2.7047898 |
| SW31.06  | 16  | 16      | 0         | 16      | 66       | 6         | 0.911206 | 11.2620222 |           | 6         |
|          |     |         | 0.4937104 | 40.1868 | 2.684726 | 3.4847579 |          |            |           | 8.3425609 |
| SW31.07  | 40  | 40      | 4         | 67      | 94       | 6         | 0.96575  | 29.1970803 |           | 6         |
|          |     | 1083.81 |           | 1081.42 | 16.80824 | 6.2911341 |          |            |           | 696.29238 |
| SW33.01  | 620 | 579     | 64.532596 | 018     | 14       | 2         | 0.997848 | 464.684015 |           | 7         |
|          |     | 362.205 | 12.554748 | 362.792 | 6.639766 |           |          |            |           | 162.73204 |
| SW33.02  | 320 | 48      | 6         | 142     | 2        | 5.5708467 | 0.995528 | 223.613596 |           | 9         |
|          |     | 1428.79 | 98.343364 | 1366.97 | 16.58372 | 6.3986478 |          |            |           | 925.37053 |
| SW33.03  | 678 | 286     | 1         | 366     | 52       | 9         | 0.998096 | 525.210084 |           | 6         |
|          |     | 1639.92 | 112.71225 | 1628.25 | 16.21770 | 6.4920891 |          |            |           |           |
| SW33.04  | 729 | 715     | 2         | 185     | 83       | 6         | 0.998294 | 586.166471 | 1210.8657 |           |
|          |     | 2501.04 | 199.10825 | 2617.03 |          | 6.6425969 |          |            |           | 2147.5297 |
| SW33.05  | 821 | 511     | 3         | 967     | 14.67729 | 6         | 0.99857  | 699.300699 |           | 2         |
|          |     | 1303.60 | 84.013939 | 1349.35 | 18.81321 | 6.3653057 |          |            |           | 862.55656 |
| SW33.06  | 664 | 265     | 2         | 139     | 05       | 1         | 0.997982 | 495.540139 |           | 8         |
|          |     | 1177.84 | 79.315215 | 1203.65 | 18.52369 | 6.2509562 |          |            |           | 670.28051 |
| SW38.03  | 612 | 091     | 4         | 042     | 44       | 9         | 0.997674 | 429.922614 |           | 5         |



|         |     |           |           |          |           |           |          |            |           |
|---------|-----|-----------|-----------|----------|-----------|-----------|----------|------------|-----------|
|         |     | 128.230   | 3.5599718 | 127.799  | 4.976695  | 4.5357387 |          |            | 37.284421 |
| SW38.05 | 124 | 769       | 1         | 801      | 05        | 8         | 0.986764 | 75.5515261 | 1         |
|         |     | 183.230   | 10.632199 | 186.067  | 6.446704  | 4.6670977 |          |            | 53.283425 |
| SW38.08 | 159 | 769       | 7         | 433      | 68        | 2         | 0.987926 | 82.822594  | 2         |
|         |     | 11.643834 | 86.0334   | 4.512650 | 3.8596990 |           |          |            | 19.784719 |
| SW40.01 | 78  | 93.6      | 3         | 614      | 94        | 8         | 0.97251  | 36.3768643 | 8         |
|         |     | 1.5802298 | 87.1796   | 4.619396 | 4.1893661 |           |          |            | 22.545448 |
| SW40.03 | 86  | 87        | 7         | 919      | 96        | 4         | 0.981636 | 54.4543672 | 7         |
|         |     | 3.4443596 | 116.662   | 5.085906 | 4.4602852 |           |          |            | 33.144492 |
| SW40.05 | 114 | 117.5     | 9         | 351      | 97        | 1         | 0.985974 | 71.2961643 | 1         |
|         |     |           |           | 3.010186 | 3.7165490 |           |          |            | 10.794182 |
| SW40.07 | 49  | 49        | 0         | 49       | 79        | 6         | 0.97272  | 36.6568915 | 1         |
|         |     | 0.4947642 | 48.1610   | 2.873662 | 3.7158136 |           |          |            | 10.513519 |
| SW40.08 | 48  | 48        | 5         | 024      | 47        | 3         | 0.97287  | 36.8595651 | 9         |
|         |     | 664.853   | 34.724433 | 702.893  | 14.94659  | 5.9359553 |          |            | 344.33832 |
| SW40.09 | 469 | 659       | 1         | 196      | 72        | 2         | 0.99674  | 306.748466 | 1         |
|         |     | 172.75986 | 2170.37   | 17.03852 | 6.5359544 |           |          |            | 1462.4471 |
| SW43.04 | 762 | 2152.04   | 4         | 263      | 82        | 4         | 0.998346 | 604.594921 | 6         |
|         |     | 446.181   | 26.003820 | 434.897  | 9.737036  | 5.5506106 |          |            | 179.55857 |
| SW43.05 | 338 | 818       | 6         | 751      | 3         | 6         | 0.99503  | 201.207244 | 6         |
|         |     | 209.972   | 5.5984958 | 212.743  | 5.474219  | 5.0187191 |          |            | 74.599851 |
| SW43.06 | 199 | 973       | 7         | 621      | 28        | 1         | 0.991912 | 123.63996  | 3         |
|         |     | 763.266   | 41.327118 | 817.411  | 16.79084  |           |          |            | 416.84738 |
| SW43.07 | 510 | 667       | 6         | 937      | 3         | 6.0271439 | 0.996988 | 332.005312 | 1         |
|         |     | 1757.07   | 125.32180 | 1871.02  | 18.99345  |           |          |            | 1273.0791 |
| SW43.08 | 738 | 534       | 9         | 408      | 74        | 6.4967984 | 0.99826  | 574.712644 | 4         |
|         |     | 633.294   | 38.729967 | 644.634  | 13.91327  | 5.8080659 |          |            | 283.33186 |
| SW43.09 | 428 | 737       | 4         | 653      | 25        | 5         | 0.996198 | 263.019463 | 7         |
|         |     | 1410.72   | 94.611359 | 1451.75  | 18.50389  |           |          |            |           |
| SW46.01 | 680 | 109       | 1         | 494      | 5         | 6.3937451 | 0.998046 | 511.770727 | 934.8075  |
|         |     | 715.722   | 38.512163 | 733.864  | 14.59347  | 5.9981188 |          |            | 379.86965 |
| SW46.02 | 490 | 222       | 3         | 85       | 81        | 8         | 0.997004 | 333.778371 | 9         |
|         |     | 382.166   | 21.991383 | 382.836  | 8.730470  | 5.3930006 |          |            | 143.63640 |
| SW46.04 | 298 | 667       | 6         | 675      | 75        | 6         | 0.994236 | 173.490632 | 8         |
|         |     | 1852.18   | 131.96638 | 1875.62  | 16.01166  | 6.5442029 |          |            | 1445.1947 |
| SW46.05 | 760 | 121       | 9         | 984      | 99        | 8         | 0.998392 | 621.890547 | 1         |
|         |     | 1363.33   | 93.472807 | 1397.52  | 18.65401  | 6.3482679 |          |            | 841.41469 |
| SW46.06 | 659 | 813       | 9         | 822      | 17        | 6         | 0.997928 | 482.625483 | 2         |
|         |     | 1147.76   | 69.956191 | 1162.16  | 17.26003  | 6.3141691 |          |            | 744.68150 |
| SW49.01 | 634 | 471       | 6         | 993      | 7         | 6         | 0.99789  | 473.933649 | 1         |
|         |     | 959.281   | 57.225214 | 1041.20  | 19.01996  | 6.1591322 |          |            | 550.38240 |
| SW49.03 | 570 | 69        | 4         | 129      | 96        | 8         | 0.997394 | 383.729854 | 8         |
|         |     | 225.028   | 8.3254188 | 225.001  | 5.352650  | 5.0574989 |          |            | 78.684440 |
| SW49.04 | 206 | 571       | 3         | 183      | 5         | 5         | 0.992248 | 128.998968 | 2         |
|         |     | 9.1880682 | 215.042   | 4.734906 | 5.1035270 |           |          |            | 76.920499 |
| SW49.05 | 203 | 222.375   | 9         | 156      | 71        | 6         | 0.992956 | 141.964793 | 8         |
|         |     | 3696.56   | 356.66937 | 3821.17  | 13.28291  | 6.7004636 |          |            | 2946.5009 |
| SW49.07 | 861 | 122       | 6         | 219      | 27        | 2         | 0.998662 | 747.384156 | 9         |
|         |     | 160.687   | 6.5400071 | 157.389  | 4.955924  | 4.7395828 |          |            | 48.940833 |
| SW50.01 | 150 | 5         | 8         | 41       | 38        | 5         | 0.989294 | 93.405567  | 4         |
|         |     | 0.4930066 | 36.3805   | 1.828162 | 3.3943770 |           |          |            | 7.3080809 |
| SW50.02 | 36  | 36        | 5         | 41       | 46        | 2         | 0.961728 | 26.1287625 | 3         |

|         |     |         |           |         |          |           |          |            |           |
|---------|-----|---------|-----------|---------|----------|-----------|----------|------------|-----------|
|         |     |         | 0.4967426 | 77.1556 | 4.371533 | 4.1016497 |          |            | 19.448027 |
| SW50.04 | 77  | 77      | 4         | 42      | 25       | 3         | 0.978962 | 47.5330355 | 4         |
|         |     | 270.634 | 14.994995 | 273.208 | 7.329285 | 5.0486945 |          |            | 90.972487 |
| SW50.05 | 226 | 146     | 6         | 032     | 65       | 4         | 0.99152  | 117.924528 | 5         |
|         |     |         | 14.347272 | 274.058 | 7.230033 | 5.0337627 |          |            | 90.972487 |
| SW50.06 | 226 | 269.4   | 6         | 509     | 75       | 1         | 0.991252 | 114.311843 | 5         |
|         |     | 421.245 | 32.003419 | 422.220 | 10.58460 | 5.2786440 |          |            | 137.87913 |
| SW51.04 | 291 | 283     | 8         | 328     | 53       | 6         | 0.993042 | 143.71946  | 6         |
|         |     |         | 0.0990867 | 55.3411 | 3.295062 | 3.7914025 |          |            | 12.520377 |
| SW51.05 | 55  | 55      | 4         | 99      | 38       | 6         | 0.97375  | 38.0952381 | 3         |
|         |     |         | 5.3706097 | 78.9042 | 4.324772 | 4.0147670 |          |            | 19.113207 |
| SW51.06 | 76  | 81.25   | 9         | 093     | 9        | 9         | 0.97785  | 45.1467269 | 7         |
|         |     | 150.769 | 7.3624733 | 146.966 | 5.283612 | 4.6034867 |          |            | 43.850023 |
| SW51.08 | 139 | 231     | 9         | 957     | 92       | 6         | 0.987286 | 78.6534529 | 6         |
|         |     |         | 0.1234276 | 40.3710 | 2.809075 | 3.4342469 |          |            | 8.3425609 |
| SW51.09 | 40  | 40      | 1         | 482     | 33       | 6         | 0.963066 | 27.0753236 | 6         |
|         |     | 162.437 | 8.1461593 | 159.136 | 5.737042 | 4.6733323 |          |            |           |
| SW58.01 | 148 | 5       | 8         | 152     | 13       | 3         | 0.98829  | 85.3970965 | 47.997644 |
|         |     |         | 27.463211 | 173.401 | 6.877900 | 4.3815745 |          |            | 39.425196 |
| SW58.02 | 129 | 190.75  | 4         | 199     | 91       | 9         | 0.984006 | 62.5234463 | 8         |
|         |     |         | 3.9161574 | 81.2211 | 4.368121 |           |          |            | 19.113207 |
| SW58.03 | 76  | 80.5    | 1         | 229     | 71       | 3.8240742 | 0.971712 | 35.3506787 | 7         |
|         |     |         | 1.2954545 | 60.5070 | 3.621399 | 3.9010984 |          |            | 14.013230 |
| SW58.06 | 60  | 60.5    | 5         | 73      | 39       | 5         | 0.97694  | 43.3651344 | 2         |
|         |     |         |           |         | 3.198557 | 3.7778140 |          |            | 11.648288 |
| SW58.07 | 52  | 52      | 0         | 52      | 37       | 1         | 0.973852 | 38.2438427 | 1         |
|         |     |         |           |         | 3.135249 | 3.6251846 |          |            | 10.234894 |
| SW58.09 | 47  | 47      | 0         | 47      | 15       | 6         | 0.9697   | 33.0033003 | 7         |
|         |     | 2218.63 | 168.30984 | 2254.01 | 14.65760 | 6.6111904 |          |            | 1856.8282 |
| SW63.02 | 800 | 83      | 8         | 11      | 05       | 3         | 0.998522 | 676.589987 | 8         |
|         |     |         | 55.708170 | 1015.40 | 18.56500 | 6.2140248 |          |            | 595.80752 |
| SW63.03 | 587 | 971.2   | 2         | 894     | 61       | 8         | 0.997602 | 417.014179 | 1         |
|         |     | 1402.29 |           | 1394.20 | 18.30181 | 6.3834456 |          |            | 902.29902 |
| SW63.04 | 673 | 787     | 95.766148 | 466     | 41       | 8         | 0.998032 | 508.130081 | 9         |
|         |     | 1151.76 | 70.944254 | 1149.66 | 17.10747 | 6.3137867 |          |            | 741.09718 |
| SW63.05 | 633 | 667     | 4         | 334     | 1        | 6         | 0.997894 | 474.833808 | 4         |
|         |     | 1122.24 | 65.186885 | 1154.21 | 17.85312 |           |          |            | 766.62362 |
| SW63.06 | 640 | 54      | 4         | 806     | 42       | 6.329736  | 0.997926 | 482.160077 | 5         |
|         |     | 516.944 | 23.458376 | 539.202 | 11.40023 | 5.7776168 |          |            | 253.27906 |
| SW63.07 | 405 | 444     | 7         | 793     | 07       | 9         | 0.996194 | 262.743037 | 7         |
|         |     |         | 0.4947642 | 48.1944 | 2.971564 | 3.7002456 |          |            | 10.513519 |
| SW64.01 | 48  | 48      | 5         | 849     | 78       | 5         | 0.972234 | 36.0152705 | 9         |
|         |     |         | 0.2462960 | 34.4562 | 2.009731 | 3.2804634 |          |            | 6.8040632 |
| SW64.02 | 34  | 34      | 9         | 359     | 91       | 4         | 0.955036 | 22.2400142 | 3         |
|         |     | 52.3333 | 0.9242565 | 52.7819 | 3.208699 | 3.6578331 |          |            | 11.648288 |
| SW64.03 | 52  | 333     | 8         | 731     | 85       | 7         | 0.968262 | 31.5079715 | 1         |
|         |     |         | 0.4435179 | 63.7052 | 3.955878 |           |          |            | 14.932265 |
| SW64.04 | 63  | 63.125  | 9         | 147     | 82       | 3.6988139 | 0.968618 | 31.8654006 | 5         |
|         |     |         |           | 41.2576 | 2.803450 | 3.4153709 |          |            | 8.6065827 |
| SW64.06 | 41  | 41      | 0.2469324 | 295     | 83       | 2         | 0.95907  | 24.431957  | 4         |
|         |     |         | 0.4918693 | 31.3759 | 2.176306 | 3.1894652 |          |            |           |
| SW64.07 | 31  | 31      | 8         | 414     | 75       | 3         | 0.953168 | 21.3529211 | 6.0650427 |

|          |     |         |           |         |          |           |          |            |           |           |
|----------|-----|---------|-----------|---------|----------|-----------|----------|------------|-----------|-----------|
|          |     |         |           |         | 1.629062 | 3.0495168 |          |            |           | 4.8804419 |
| SW65.03  | 26  | 26      | 0         | 26      | 97       | 8         | 0.942742 | 17.4648084 |           | 6         |
|          |     |         | 1.8138697 | 45.4161 | 3.142597 | 3.4204977 |          |            |           | 9.4113548 |
| SW65.05  | 44  | 45      | 5         | 932     | 25       | 4         | 0.960964 | 25.6173788 |           | 7         |
|          |     |         |           |         | 2.978181 | 3.5906407 |          |            |           | 9.9583175 |
| SW65.06  | 46  | 46      | 0         | 46      | 53       | 7         | 0.966146 | 29.538607  |           | 9         |
|          |     |         | 0.2456518 | 29.4444 | 1.666988 | 3.0944588 |          |            |           | 5.5839911 |
| SW65.07  | 29  | 29      | 4         | 444     | 54       | 3         | 0.947566 | 19.0715948 |           | 2         |
|          |     |         |           |         | 1.358732 | 2.9796503 |          |            |           | 4.8804419 |
| SW65.08  | 26  | 26      | 0         | 26      | 44       | 4         | 0.936222 | 15.6793879 |           | 6         |
|          |     | 1541.64 | 103.54737 | 1673.12 | 20.12552 | 6.4499819 |          |            |           | 1104.1769 |
| SW65.09  | 712 | 286     | 9         | 092     | 32       | 9         | 0.99815  | 540.540541 |           | 9         |
|          |     | 947.271 | 62.304263 | 958.196 | 18.50230 | 6.1037410 |          |            |           | 487.86919 |
| SW65.10  | 544 | 186     | 9         | 283     | 51       | 2         | 0.997246 | 363.108206 |           | 8         |
|          |     |         |           |         | 2.215646 | 3.2698721 |          |            |           | 6.5554321 |
| SW781.03 | 33  | 33      | 0         | 33      | 84       | 7         | 0.956548 | 23.0139004 |           | 1         |
|          |     |         |           |         | 2.504050 | 3.3988180 |          |            |           | 7.5634245 |
| SW781.05 | 37  | 37      | 0         | 37      | 77       | 8         | 0.962778 | 26.865832  |           | 5         |
|          |     |         |           |         | 1.788854 |           |          |            |           | 3.5419457 |
| SW781.06 | 20  | 20      | 0         | 20      | 38       | 2.6724301 | 0.916226 | 11.9368778 |           | 8         |
|          |     |         |           |         | 1.809068 | 2.7808027 |          |            |           |           |
| SW781.07 | 22  | 22      | 0         | 22      | 07       | 3         | 0.925568 | 13.4350817 | 3.9775371 |           |
|          |     |         |           |         | 2.018433 | 2.9845488 |          |            |           | 5.1125109 |
| SW781.08 | 27  | 27      | 0         | 27      | 57       | 4         | 0.936848 | 15.8348113 |           | 2         |
|          |     |         |           |         | 1.658312 | 3.4308854 |          |            |           | 7.3080809 |
| SW782.01 | 36  | 36      | 0         | 36      | 4        | 7         | 0.96345  | 27.3597811 |           | 3         |
|          |     |         | 2.2305169 | 83.0866 | 4.500469 |           |          |            |           | 21.150173 |
| SW782.02 | 82  | 83.5    | 4         | 84      | 05       | 4.2050299 | 0.9829   | 58.4795322 |           | 3         |
|          |     | 292.108 | 13.706247 | 292.026 | 6.788258 | 5.2337778 |          |            |           | 107.68916 |
| SW782.03 | 251 | 696     | 1         | 065     | 42       | 4         | 0.99333  | 149.925038 |           | 4         |
|          |     | 280.576 | 22.286481 | 254.600 | 6.628178 | 5.0358842 |          |            |           | 85.327629 |
| SW782.09 | 217 | 923     | 4         | 492     | 14       | 1         | 0.991516 | 117.86893  |           | 4         |
|          |     | 723.038 | 38.663407 | 766.500 | 15.83018 |           |          |            |           | 385.21207 |
| SW786.01 | 493 | 168     | 6         | 847     | 16       | 5.9810855 | 0.996788 | 311.332503 |           | 7         |
|          |     | 735.857 | 35.791741 | 756.524 | 14.82240 |           |          |            |           | 434.58801 |
| SW786.02 | 519 | 143     | 1         | 259     | 52       | 6.0826    | 0.9973   | 370.37037  |           | 5         |
|          |     | 741.791 | 43.869913 | 743.850 | 15.16405 |           |          |            |           | 369.39039 |
| SW786.03 | 484 | 304     | 6         | 712     | 72       | 5.9462728 | 0.996526 | 287.85262  |           | 3         |
|          |     |         | 25.764350 | 467.603 | 10.14834 | 5.6409390 |          |            |           | 201.72496 |
| SW786.06 | 360 | 471.8   | 9         | 276     | 56       | 1         | 0.995624 | 228.519196 |           | 6         |
|          |     |         |           | 376.528 | 8.822307 | 5.3767999 |          |            |           | 143.63640 |
| SW786.07 | 298 | 369.25  | 19.054615 | 849     | 66       | 8         | 0.993932 | 164.798945 |           | 8         |
|          |     | 1012.78 |           | 1072.72 | 19.09012 |           |          |            |           | 612.80147 |
| SW786.09 | 593 | 378     | 60.040602 | 665     | 33       | 6.2193803 | 0.997598 | 416.319734 |           | 3         |
|          |     | 1499.92 | 99.820617 | 1534.39 | 17.08353 | 6.4470481 |          |            |           | 1069.5348 |
| SW787.01 | 706 | 857     | 3         | 205     | 78       | 5         | 0.998186 | 551.267916 |           | 7         |
|          |     | 1056.46 |           | 1114.73 | 18.86348 | 6.2232462 |          |            |           | 624.42799 |
| SW787.02 | 597 | 154     | 65.253601 | 09      | 22       | 9         | 0.997602 | 417.014179 |           | 6         |
|          |     | 2767.94 | 236.81439 | 2755.97 | 14.27855 | 6.6440253 |          |            |           | 2178.8469 |
| SW787.03 | 823 | 068     | 3         | 481     | 99       | 7         | 0.998572 | 700.280112 |           | 4         |
|          |     | 1982.06 | 141.77635 | 2026.35 | 15.14634 | 6.5868475 |          |            |           | 1673.6418 |
| SW787.04 | 784 | 579     | 9         | 704     | 98       | 1         | 0.99848  | 657.894737 |           | 1         |

|          |     |         |           |         |          |           |          |            |  |           |
|----------|-----|---------|-----------|---------|----------|-----------|----------|------------|--|-----------|
|          |     | 646.802 | 29.564399 | 665.689 | 13.94684 | 5.9994619 |          |            |  | 365.95694 |
| SW787.05 | 482 | 92      | 1         | 818     | 58       | 6         | 0.997048 | 338.753388 |  | 7         |
|          |     | 297.396 | 11.386718 | 297.021 | 6.246260 | 5.3102846 |          |            |  | 117.01568 |
| SW787.06 | 264 | 226     | 2         | 915     | 36       | 6         | 0.993794 | 161.134386 |  | 1         |
|          |     |         |           |         | 3.783842 | 4.0028546 |          |            |  | 14.932265 |
| SW788.01 | 63  | 63      | 0         | 63      | 01       | 7         | 0.979754 | 49.3924726 |  | 5         |
|          |     |         |           |         | 1.316561 | 2.3543936 |          |            |  | 2.5030219 |
| SW788.02 | 15  | 15      | 0         | 15      | 18       | 8         | 0.879288 | 8.28418053 |  | 3         |
|          |     |         | 0.4841229 |         | 1.544436 | 2.3367279 |          |            |  | 2.7047898 |
| SW788.04 | 16  | 16      | 2         | 16.584  | 71       | 5         | 0.876364 | 8.08825908 |  | 6         |
|          |     |         |           |         | 0.953462 | 2.1119626 |          |            |  |           |
| SW788.05 | 11  | 11      | 0         | 11      | 59       | 7         | 0.844528 | 6.43202635 |  | 1.7290385 |
|          |     |         | 0.4909902 | 28.5219 | 1.802994 | 3.0172264 |          |            |  | 5.3470387 |
| SW788.06 | 28  | 28      | 5         | 479     | 8        | 2         | 0.94003  | 16.6750042 |  | 8         |
|          |     |         | 0.2470058 | 42.3230 | 2.628861 | 3.5156234 |          |            |  | 8.8727322 |
| SW788.07 | 42  | 42      | 8         | 794     | 97       | 3         | 0.96585  | 29.2825769 |  | 1         |
|          |     |         | 0.4894725 | 25.0864 | 1.486409 | 3.0453847 |          |            |  | 4.4238312 |
| SW788.10 | 24  | 24      | 1         | 198     | 51       | 8         | 0.948544 | 19.4340796 |  | 1         |
|          |     |         | 25.114456 | 184.906 | 7.157030 | 4.3333098 |          |            |  | 40.732534 |
| SW789.01 | 132 | 192.2   | 3         | 52      | 8        | 6         | 0.982354 | 56.6700669 |  | 1         |
|          |     |         | 0.0710705 | 100.188 | 4.850969 | 4.3972881 |          |            |  | 27.662922 |
| SW789.06 | 100 | 100     | 3         | 378     | 97       | 8         | 0.985366 | 68.3340167 |  | 1         |
|          |     |         | 0.1236910 | 48.4451 | 2.997810 | 3.6571330 |          |            |  | 10.513519 |
| SW789.07 | 48  | 48      | 6         | 802     | 7        | 2         | 0.970726 | 34.1600055 |  | 9         |
|          |     | 370.131 | 18.441485 | 367.710 | 7.835813 |           |          |            |  | 147.84082 |
| SW789.08 | 303 | 148     | 8         | 768     | 9        | 5.4550575 | 0.994744 | 190.258752 |  | 4         |
|          |     |         | 13.212941 | 333.599 | 6.240322 | 5.4768672 |          |            |  | 141.15073 |
| SW790.01 | 295 | 337.6   | 3         | 637     | 78       | 7         | 0.995088 | 203.583062 |  | 4         |
|          |     |         | 0.2461829 | 33.3284 | 2.406633 | 3.1917852 |          |            |  | 6.5554321 |
| SW790.03 | 33  | 33      | 8         | 898     | 31       | 8         | 0.951062 | 20.4340186 |  | 1         |
|          |     |         | 1.8140507 | 47.5118 | 3.265108 | 3.4562311 |          |            |  | 9.9583175 |
| SW790.07 | 46  | 47      | 6         | 713     | 18       | 9         | 0.962304 | 26.5280136 |  | 9         |
|          |     |         |           |         | 1.328422 |           |          |            |  | 2.9096498 |
| SW793.02 | 17  | 17      | 0         | 17      | 33       | 2.4908301 | 0.902418 | 10.2477916 |  | 3         |
|          |     |         |           |         | 2.366431 | 3.2884088 |          |            |  | 7.0549535 |
| SW793.03 | 35  | 35      | 0         | 35      | 91       | 8         | 0.954492 | 21.9741584 |  | 3         |
|          |     |         |           |         | 1.581138 | 2.5854474 |          |            |  | 3.1175139 |
| SW793.06 | 18  | 18      | 0         | 18      | 83       | 8         | 0.917158 | 12.0711716 |  | 4         |
|          |     |         |           |         | 0.974679 | 2.7854278 |          |            |  | 3.5419457 |
| SW793.09 | 20  | 20      | 0         | 20      | 43       | 4         | 0.930386 | 14.3649266 |  | 8         |
|          |     |         |           |         | 0.948683 | 1.8878644 |          |            |  | 1.5445238 |
| SW793.10 | 10  | 10      | 0         | 10      | 3        | 9         | 0.810434 | 5.27520758 |  | 2         |
|          |     |         |           |         | 1.609630 | 2.8108780 |          |            |  |           |
| SW795.04 | 22  | 22      | 0         | 22      | 11       | 9         | 0.930508 | 14.3901456 |  | 3.9775371 |
|          |     |         | 0.4931969 | 37.2942 | 2.167712 | 3.4277975 |          |            |  | 7.5634245 |
| SW795.07 | 37  | 37      | 6         | 31      | 65       | 1         | 0.96396  | 27.7469478 |  | 5         |
|          |     |         |           |         | 0.960768 |           |          |            |  | 2.1091676 |
| SW795.09 | 13  | 13      | 0         | 13      | 92       | 2.3976174 | 0.898864 | 9.887676   |  | 9         |
|          |     |         |           |         | 1.561249 |           |          |            |  | 2.7047898 |
| SW795.10 | 16  | 16      | 0         | 16      | 5        | 2.4102199 | 0.896332 | 9.64617818 |  | 6         |
|          |     |         | 0.2425356 | 17.8308 | 1.774503 | 2.5228005 |          |            |  | 2.9096498 |
| SW796.03 | 17  | 17      | 3         | 148     | 65       | 2         | 0.909696 | 11.0737066 |  | 3         |

|          |     |         |           |         |          |           |          |            |  |           |
|----------|-----|---------|-----------|---------|----------|-----------|----------|------------|--|-----------|
|          |     |         |           |         | 1.358732 | 3.1038568 |          |            |  | 4.8804419 |
| SW796.04 | 26  | 26      | 0         | 26      | 44       | 8         | 0.95008  | 20.0320513 |  | 6         |
|          |     | 149.555 | 4.9829943 | 149.631 | 5.390597 | 4.6730675 |          |            |  | 45.215037 |
| SW796.05 | 142 | 556     | 8         | 339     | 72       | 8         | 0.988782 | 89.1424496 |  | 5         |
|          |     |         |           |         | 2.070196 |           |          |            |  | 7.0549535 |
| SW796.06 | 35  | 35      | 0         | 35      | 68       | 3.3809776 | 0.96205  | 26.3504611 |  | 3         |
|          |     |         |           |         | 3.125290 | 3.4371735 |          |            |  | 9.1409943 |
| SW796.10 | 43  | 43      | 0         | 43      | 68       | 4         | 0.959992 | 24.995001  |  | 4         |
|          |     |         |           |         | 1.620185 | 2.9123211 |          |            |  | 4.4238312 |
| SW797.01 | 24  | 24      | 0         | 24      | 18       | 6         | 0.93673  | 15.805279  |  | 1         |
|          |     |         |           |         | 3.603117 | 3.8380698 |          |            |  | 13.111649 |
| SW797.02 | 57  | 57      | 0         | 57      | 56       | 1         | 0.974412 | 39.0808191 |  | 3         |
|          |     |         |           |         | 1.596871 | 2.6838457 |          |            |  | 3.5419457 |
| SW797.04 | 20  | 20      | 0         | 20      | 94       | 1         | 0.919916 | 12.4868888 |  | 8         |
|          |     |         |           |         | 0.963624 | 2.2614517 |          |            |  | 2.3044443 |
| SW797.06 | 14  | 14      | 0         | 14      | 11       | 6         | 0.870718 | 7.73502885 |  | 1         |
|          |     | 563.082 | 27.427164 | 578.552 | 12.38594 | 5.8351822 |          |            |  | 279.25447 |
| SW797.09 | 425 | 569     | 4         | 045     | 97       | 9         | 0.996424 | 279.642058 |  | 9         |
|          |     |         |           |         | 3.195741 | 3.5668079 |          |            |  | 10.234894 |
| SW798.05 | 47  | 47      | 0         | 47      | 85       | 6         | 0.965328 | 28.8417167 |  | 7         |
|          |     |         |           |         | 0.982607 | 3.2202277 |          |            |  | 5.5839911 |
| SW798.06 | 29  | 29      | 0         | 29      | 37       | 5         | 0.955364 | 22.4034412 |  | 2         |
|          |     | 110.571 | 2.5150130 | 112.088 | 5.114972 | 4.3651484 |          |            |  | 30.750531 |
| SW798.09 | 108 | 429     | 3         | 235     | 26       | 8         | 0.984544 | 64.699793  |  | 5         |
|          |     |         | 0.2457980 | 30.4786 | 2.053989 | 3.2099464 |          |            |  | 5.8233357 |
| SW798.10 | 30  | 30      | 2         | 994     | 87       | 8         | 0.955386 | 22.4144887 |  | 9         |
|          |     |         |           |         | 1.333333 | 2.7259285 |          |            |  | 3.1175139 |
| SW799.03 | 18  | 18      | 0         | 18      | 33       | 1         | 0.928784 | 14.0417884 |  | 4         |
|          |     |         |           |         | 1.866513 |           |          |            |  |           |
| SW799.05 | 31  | 31      | 0         | 31      | 05       | 3.2578298 | 0.957222 | 23.3765019 |  | 6.0650427 |
|          |     | 55.3333 | 0.9243672 | 55.5916 | 3.449167 | 3.7821489 |          |            |  | 12.520377 |
| SW799.07 | 55  | 333     | 7         | 843     | 61       | 8         | 0.974084 | 38.5862016 |  | 3         |
|          |     |         | 16.813203 | 209.034 | 6.798887 | 4.7630813 |          |            |  | 60.363131 |
| SW799.09 | 173 | 216.125 | 6         | 524     | 43       | 8         | 0.989052 | 91.3408842 |  | 1         |
|          |     | 195.791 | 11.029161 | 192.486 | 6.073507 |           |          |            |  | 59.327189 |
| SW799.10 | 171 | 667     | 9         | 382     | 98       | 4.7611125 | 0.988738 | 88.7941751 |  | 1         |
|          |     |         | 0.1647618 | 44.3347 | 2.854134 | 3.5303744 |          |            |  | 9.4113548 |
| SW802.04 | 44  | 44      | 4         | 037     | 42       | 6         | 0.96553  | 29.010734  |  | 7         |
|          |     |         |           |         | 3.174901 | 3.7404316 |          |            |  | 11.076870 |
| SW803.03 | 50  | 50      | 0         | 50      | 57       | 7         | 0.972994 | 37.0288084 |  | 8         |
|          |     |         | 0.4909902 | 28.4176 | 1.767283 | 3.1044229 |          |            |  | 5.3470387 |
| SW803.04 | 28  | 28      | 5         | 955     | 31       | 3         | 0.948632 | 19.4673727 |  | 8         |
|          |     |         |           |         | 1.341640 | 2.7913704 |          |            |  | 3.5419457 |
| SW803.05 | 20  | 20      | 0         | 20      | 79       | 2         | 0.931386 | 14.5742851 |  | 8         |
|          |     | 51.3333 |           | 51.7428 | 3.216859 | 3.6694280 |          |            |  |           |
| SW803.06 | 51  | 333     | 0.9242168 | 336     | 98       | 1         | 0.969834 | 33.1499039 |  | 11.361576 |
|          |     |         | 12.108790 | 186.530 | 5.539810 | 4.8045816 |          |            |  | 58.812315 |
| SW803.07 | 170 | 196.4   | 1         | 556     | 24       | 8         | 0.989402 | 94.3574259 |  | 3         |
|          |     |         |           |         | 1.648863 | 3.3003673 |          |            |  | 6.3090836 |
| SW803.08 | 32  | 32      | 0         | 32      | 25       | 9         | 0.958406 | 24.0419291 |  | 3         |
|          |     |         |           |         | 1.888800 | 3.4276346 |          |            |  | 7.5634245 |
| SW803.09 | 37  | 37      | 0         | 37      | 56       | 8         | 0.96211  | 26.3921879 |  | 5         |

|          |     |         |           |         |          |           |          |            |           |  |
|----------|-----|---------|-----------|---------|----------|-----------|----------|------------|-----------|--|
|          |     |         |           |         | 1.646109 | 3.2577012 |          |            |           |  |
| SW805.01 | 31  | 31      | 0         | 31      | 78       | 4         | 0.95692  | 23.2126277 | 6.0650427 |  |
|          |     |         | 0.2480694 | 65.2219 | 3.869117 | 3.9193552 |          |            | 15.554577 |  |
| SW805.02 | 65  | 65      | 7         | 077     | 21       | 5         | 0.976268 | 42.1371987 | 7         |  |
|          |     |         | 0.2477168 | 55.2919 | 3.052005 | 3.8404970 |          |            | 12.520377 |  |
| SW805.03 | 55  | 55      | 5         | 282     | 22       | 2         | 0.975504 | 40.8229915 | 3         |  |
|          |     | 407.118 | 17.846479 | 404.106 | 7.986731 | 5.5998246 |          |            | 179.55857 |  |
| SW805.04 | 338 | 421     | 7         | 58      | 12       | 1         | 0.99555  | 224.719101 | 6         |  |
|          |     |         |           |         | 0.974679 | 2.8595438 |          |            | 3.5419457 |  |
| SW805.05 | 20  | 20      | 0         | 20      | 43       | 6         | 0.937284 | 15.9448944 | 8         |  |
|          |     | 195.387 | 2.6507250 | 197.021 | 4.033269 | 5.0639293 |          |            | 70.623828 |  |
| SW805.06 | 192 | 097     | 9         | 517     | 06       | 9         | 0.99266  | 136.239782 | 2         |  |
|          |     |         |           |         | 1.653872 | 3.3595380 |          |            | 6.8040632 |  |
| SW805.07 | 34  | 34      | 0         | 34      | 46       | 4         | 0.9603   | 25.1889169 | 3         |  |
|          |     |         | 1.8401708 | 97.7915 | 4.795703 | 4.3725341 |          |            | 26.535662 |  |
| SW805.08 | 97  | 98.2    | 9         | 191     | 85       | 2         | 0.984734 | 65.5050439 | 1         |  |
|          |     | 295.489 | 14.789478 | 296.018 | 6.956748 |           |          |            | 106.29379 |  |
| SW806.01 | 249 | 796     | 3         | 045     | 49       | 5.2054738 | 0.99304  | 143.678161 | 2         |  |
|          |     |         | 4.6273642 | 58.0724 | 3.499970 | 3.8171965 |          |            | 13.111649 |  |
| SW806.02 | 57  | 60      | 6         | 869     | 53       | 7         | 0.97427  | 38.865138  | 3         |  |
|          |     |         |           |         | 1.833030 | 2.9655511 |          |            | 4.6508688 |  |
| SW806.03 | 25  | 25      | 0         | 25      | 28       | 9         | 0.94062  | 16.8406871 | 2         |  |
|          |     |         | 0.4873397 | 21.1111 | 1.212469 | 2.8358486 |          |            | 3.5419457 |  |
| SW806.04 | 20  | 20      | 2         | 111     | 61       | 1         | 0.93648  | 15.7430731 | 8         |  |
|          |     |         | 2.3175348 |         | 1.928104 | 3.1881191 |          |            | 5.8233357 |  |
| SW806.05 | 30  | 31      | 4         | 32.12   | 02       | 5         | 0.953784 | 21.6375281 | 9         |  |
|          |     |         | 0.4923659 | 33.2941 | 1.999130 | 3.3099720 |          |            | 6.5554321 |  |
| SW806.06 | 33  | 33      | 6         | 9       | 2        | 1         | 0.959222 | 24.5230271 | 1         |  |
|          |     |         | 5.8565645 | 175.825 | 4.707394 | 4.9275278 |          |            | 58.812315 |  |
| SW806.08 | 170 | 179.5   | 5         | 824     | 14       | 9         | 0.991544 | 118.259224 | 3         |  |
|          |     |         | 0.6202686 | 86.0507 | 4.598278 | 4.1318451 |          |            | 22.193839 |  |
| SW806.09 | 85  | 85.25   | 3         | 291     | 97       | 9         | 0.980432 | 51.103843  | 2         |  |
|          |     |         | 11.998471 | 178.978 | 6.737979 |           |          |            | 45.215037 |  |
| SW808.01 | 142 | 170.12  | 5         | 261     | 83       | 4.4453889 | 0.984218 | 63.3633253 | 5         |  |
|          |     |         | 2.8816147 | 59.6076 | 3.647304 | 3.7775234 |          |            | 13.410226 |  |
| SW808.02 | 58  | 60      | 7         | 403     | 05       | 4         | 0.973232 | 37.3580395 | 7         |  |
|          |     |         | 0.1237684 | 51.3347 | 3.156760 | 3.7051349 |          |            |           |  |
| SW808.03 | 51  | 51      | 4         | 152     | 34       | 5         | 0.972308 | 36.1115124 | 11.361576 |  |
|          |     |         |           |         | 1.866513 | 3.2341032 |          |            |           |  |
| SW808.04 | 31  | 31      | 0         | 31      | 05       | 9         | 0.95598  | 22.7169468 | 6.0650427 |  |
|          |     |         | 0.2429563 |         | 1.362106 |           |          |            | 3.1175139 |  |
| SW808.05 | 18  | 18      | 3         | 18.6    | 71       | 2.570515  | 0.912676 | 11.4516055 | 4         |  |
|          |     | 216.562 | 11.718162 | 217.109 | 6.422373 | 4.8525849 |          |            | 67.849120 |  |
| SW808.06 | 187 | 5       | 8         | 214     | 53       | 3         | 0.989662 | 96.7305088 | 5         |  |
|          |     | 407.246 | 22.131121 | 408.480 | 9.021575 | 5.4834924 |          |            | 162.73204 |  |
| SW808.07 | 320 | 154     | 7         | 747     | 09       | 8         | 0.99469  | 188.323917 | 9         |  |
|          |     |         |           | 194.946 | 5.639601 | 4.8970522 |          |            |           |  |
| SW809.01 | 178 | 204.4   | 12.108828 | 914     | 04       | 1         | 0.99097  | 110.741971 | 62.989346 |  |
|          |     |         | 0.4935481 | 39.3469 | 2.351994 | 3.4342916 |          |            |           |  |
| SW809.02 | 39  | 39      | 2         | 388     | 6        | 7         | 0.962318 | 26.5378695 | 8.0806827 |  |
|          |     |         | 1.2941636 | 45.1479 | 2.681644 | 3.5009398 |          |            | 9.4113548 |  |
| SW809.03 | 44  | 44.5    | 5         | 562     | 41       | 2         | 0.963256 | 27.2153277 | 7         |  |

|           |     |         |           |         |          |           |          |            |           |
|-----------|-----|---------|-----------|---------|----------|-----------|----------|------------|-----------|
|           |     | 227.714 | 22.863570 | 213.805 | 7.162040 | 4.6610082 |          |            | 57.279981 |
| SW809.04  | 167 | 286     | 5         | 3       | 01       | 8         | 0.98754  | 80.2568218 | 7         |
|           |     | 304.615 | 28.805505 | 272.532 | 7.484375 | 5.0031086 |          |            | 85.327629 |
| SW809.05  | 217 | 385     | 6         | 498     | 64       | 9         | 0.991174 | 113.301609 | 4         |
|           |     |         |           | 41.3100 | 2.484734 | 3.4734062 |          |            | 8.6065827 |
| SW809.06  | 41  | 41      | 0.4938648 | 306     | 86       | 4         | 0.96344  | 27.3522976 | 4         |
|           |     |         | 0.4850712 | 18.1111 | 1.201914 | 2.5543183 |          |            | 2.9096498 |
| SW809.07  | 17  | 17      | 5         | 111     | 86       | 6         | 0.908938 | 10.9815291 | 3         |
|           |     |         |           | 41.2538 | 2.373659 | 3.5205353 |          |            | 8.6065827 |
| SWG32.02  | 41  | 41      | 0.4938648 | 84      | 21       | 5         | 0.965334 | 28.8467086 | 4         |
|           |     | 101.333 | 15.071557 | 90.1604 | 4.694679 | 4.1069418 |          |            | 21.496200 |
| SWG32.03  | 83  | 333     | 8         | 386     | 9        | 9         | 0.980706 | 51.8295843 | 3         |
|           |     |         | 9.2962342 | 163.648 | 5.377482 |           |          |            | 50.850983 |
| SWG32.04  | 154 | 170.5   | 9         | 136     | 33       | 4.7879969 | 0.990256 | 102.627258 | 5         |
|           |     | 317.285 | 8.8111908 | 322.004 | 5.593233 | 5.4785320 |          |            |           |
| SWG32.05  | 292 | 714     | 6         | 987     | 27       | 2         | 0.995124 | 205.086136 | 138.69251 |
|           |     | 353.137 | 14.792722 | 345.239 | 6.557215 | 5.5101147 |          |            | 148.69107 |
| SWG32.08  | 304 | 931     | 3         | 587     | 13       | 1         | 0.995228 | 209.555742 | 3         |
|           |     |         |           |         | 0.966091 | 2.4866551 |          |            | 2.5030219 |
| SWG39.01  | 15  | 15      | 0         | 15      | 78       | 2         | 0.904668 | 10.4896572 | 3         |
|           |     | 528.135 | 22.387572 | 526.681 | 10.84031 | 5.8614962 |          |            | 275.22571 |
| SWG39.02  | 422 | 135     | 9         | 273     | 27       | 3         | 0.996624 | 296.208531 | 7         |
|           |     | 249.807 | 15.468139 | 235.861 | 6.028905 | 5.0531145 |          |            | 81.068072 |
| SWG39.05  | 210 | 692     | 5         | 084     | 78       | 8         | 0.992116 | 126.839168 | 8         |
|           |     | 546.722 | 26.836037 | 545.455 | 11.21525 | 5.8283957 |          |            | 267.31096 |
| SWG39.06  | 416 | 772     | 2         | 834     | 23       | 3         | 0.99649  | 284.900285 | 5         |
|           |     |         | 13.789171 | 246.842 | 6.033289 |           |          |            |           |
| SWG39.07  | 215 | 252.5   | 4         | 409     | 66       | 5.0622552 | 0.992004 | 125.062531 | 84.09905  |
|           |     |         |           |         | 1.870828 | 3.2234867 |          |            | 6.3090836 |
| Timber.04 | 32  | 32      | 0         | 32      | 69       | 1         | 0.951664 | 20.6885137 | 3         |
|           |     |         |           |         | 0.963624 | 2.3617307 |          |            | 2.3044443 |
| Timber.06 | 14  | 14      | 0         | 14      | 11       | 5         | 0.89116  | 9.1877986  | 1         |
|           |     |         | 10.091014 | 206.560 | 5.448567 | 4.9804185 |          |            | 69.507464 |
| Timber.07 | 190 | 212     | 5         | 338     | 22       | 1         | 0.991758 | 121.329774 | 7         |
|           |     | 891.149 | 54.734200 | 954.593 | 19.35277 | 6.0832006 |          |            | 474.51298 |
| WS4U.02   | 538 | 606     | 7         | 369     | 81       | 9         | 0.997136 | 349.162011 | 6         |
|           |     |         | 19.937958 | 341.111 | 7.778163 | 5.3394405 |          |            | 129.90842 |
| WS4U.03   | 281 | 351     | 3         | 39      | 45       | 1         | 0.99381  | 161.550889 | 7         |
|           |     | 613.032 |           | 605.653 | 12.90464 | 5.8068552 |          |            | 277.90619 |
| WS4U.05   | 424 | 609     | 36.62875  | 172     | 5        | 4         | 0.996194 | 262.743037 | 9         |
|           |     |         | 138.55759 | 1951.51 | 16.95901 | 6.5255707 |          |            | 1387.0462 |
| WS4U.06   | 753 | 1887    | 6         | 607     | 04       | 8         | 0.998336 | 600.961539 | 8         |
|           |     | 619.205 | 35.894854 | 641.760 | 13.53377 | 5.7890665 |          |            | 283.33186 |
| WS4U.07   | 428 | 882     | 9         | 819     | 11       | 3         | 0.995836 | 240.153698 | 7         |
|           |     | 1088.04 | 66.696762 | 1137.36 | 18.48859 |           |          |            | 667.10792 |
| WS4U.08   | 611 | 082     | 7         | 841     | 39       | 6.2573398 | 0.997706 | 435.919791 | 1         |
|           |     |         |           |         | 2.738612 | 3.0383803 |          |            | 6.3090836 |
| WS98SB.01 | 32  | 32      | 0         | 32      | 79       | 7         | 0.938828 | 16.3473485 | 3         |
|           |     | 2426.93 | 197.63015 | 2484.73 | 15.80698 | 6.6025057 |          |            | 1844.5148 |
| WS98SB.02 | 799 | 651     | 8         | 584     | 47       | 6         | 0.998486 | 660.501982 | 3         |
|           |     | 1114.49 | 71.024387 | 1119.28 | 17.63597 | 6.2590029 |          |            | 663.95241 |
| WS98SB.04 | 610 | 64      | 9         | 408     | 84       | 8         | 0.997732 | 440.917108 | 1         |

|           |     |         |           |         |          |           |          |            |           |
|-----------|-----|---------|-----------|---------|----------|-----------|----------|------------|-----------|
|           |     | 793.105 | 45.941701 | 795.717 | 15.66741 | 6.0524142 |          |            | 422.68149 |
| WS98SB.05 | 513 | 691     | 3         | 803     | 56       | 2         | 0.997164 | 352.609309 | 6         |
|           |     | 603.319 | 25.719927 | 643.275 | 13.57448 | 5.9470239 |          |            | 337.92165 |
| WS98SB.06 | 465 | 149     | 7         | 296     | 65       | 6         | 0.996834 | 315.85597  | 5         |
|           |     |         |           | 86.3404 | 4.601967 | 4.1681999 |          |            | 22.193839 |
| WS98SB.07 | 85  | 86      | 1.5802193 | 574     | 23       | 5         | 0.981536 | 54.1594454 | 2         |
|           |     |         |           |         | 2.070196 | 3.3413749 |          |            | 7.0549535 |
| WS98SB.09 | 35  | 35      | 0         | 35      | 68       | 1         | 0.959136 | 24.4714174 | 3         |
|           |     | 148.687 | 6.5399460 | 147.014 | 5.396665 |           |          |            | 43.398891 |
| WS98SB.10 | 138 | 5       | 5         | 608     | 83       | 4.5484329 | 0.985916 | 71.0025561 | 2         |

828

829 **Supplemental Table 1:**

830 **Alpha Diversity Metrics:** Results from the Alpha Diversity analysis for 365 switchgrass genotypes.

831

| family              | snps | h2 | se         | >0.9       | >0.1  | >0.1<br>(outliers) |
|---------------------|------|----|------------|------------|-------|--------------------|
| Xanthobacteraceae   |      | 5  | 0.45489741 | 0.15006082 | TRUE  | TRUE               |
| Sphingomonadaceae   |      | 31 | 0.25080413 | 0.13608337 | TRUE  | TRUE               |
| Micrococcaceae      |      | 89 | 0.26493375 | 0.1376574  | FALSE | TRUE               |
| Chitinophagaceae    | NA   |    | 0.25752125 | 0.13692033 | FALSE | TRUE               |
| Koribacteraceae     |      | 6  | 0.14298423 | 0.11619551 | FALSE | TRUE               |
| Mycobacteriaceae    |      | 15 | 0.06959644 | 0.08384037 | FALSE | TRUE               |
| Pyrinomonadaceae    |      | 8  | 0.0688696  | 0.08341623 | FALSE | TRUE               |
| Pirellulaceae       | NA   |    | 0.00794786 | 0.13035936 | FALSE | TRUE               |
| Myxococcaceae       | NA   |    | 0          | 0.17460424 | FALSE | TRUE               |
| Polyangiaceae       | NA   |    | 0          | 0.1601444  | FALSE | TRUE               |
| Reyranellaceae      |      | 18 | 0          | 0.13129499 | FALSE | TRUE               |
| Bacillaceae         |      | 12 | 0          | 0.11080426 | FALSE | TRUE               |
| Chthoniobacteraceae |      | 7  | 0          | 0.08612535 | FALSE | TRUE               |
| Nitrosomonadaceae   |      | 1  | 0          | 0.0821527  | FALSE | TRUE               |
| A21b                |      | 2  | 0          | 0.06449511 | FALSE | TRUE               |
| Haliangiaceae       |      | 80 | 0          | 0.05771382 | FALSE | TRUE               |
| Rhodanobacteraceae  |      | 11 | 0          | 0.05728122 | FALSE | TRUE               |
| Nitrospiraceae      | NA   |    | 0          | 0.05377501 | FALSE | TRUE               |
| Solibacteraceae     | NA   |    | 0          | 0.04764666 | FALSE | TRUE               |
| Comamonadaceae      |      | 5  | 0          | 0.04073533 | FALSE | TRUE               |
| Pedosphaeraceae     | NA   |    | 0          | 0.04072739 | FALSE | TRUE               |
| Gaiellaceae         |      | 1  | 0          | 0.03478031 | FALSE | TRUE               |
| Bryobacteraceae     |      | 4  | 0          | 0.03154768 | FALSE | TRUE               |
| Gemmatimonadaceae   |      | 3  | 0          | 0.0254416  | FALSE | TRUE               |
| Steroidobacteraceae | NA   |    | 0          | 0.01622218 | FALSE | TRUE               |
| Acidothermaceae     |      | 3  | -0.0067312 | 0.00802897 | FALSE | TRUE               |
| SC-l-84             | NA   | NA | NA         | NA         | FALSE | TRUE               |
| Unknown Family_4    | NA   | NA | NA         | NA         | FALSE | TRUE               |



|                            |    |     |            |            |       |       |
|----------------------------|----|-----|------------|------------|-------|-------|
| Hyphomicrobiaceae          | NA | NA  | NA         | FALSE      | TRUE  | TRUE  |
| Micromonosporaceae         |    | 8   | 0.32336921 | 0.14287441 | FALSE | TRUE  |
| Caulobacteraceae           |    | 2   | 0.2011677  | 0.15233479 | FALSE | TRUE  |
| Bdellovibrionaceae         |    | 12  | 0.19268472 | 0.12781354 | FALSE | TRUE  |
| Xiphinematobacteraceae     |    | 4   | 0.16183436 | 0.12038463 | FALSE | TRUE  |
| Nocardioidaceae            |    | 1   | 0.12583433 | 0.1099005  | FALSE | TRUE  |
| Oxalobacteraceae           |    | 22  | 0.10620934 | 0.10302864 | FALSE | TRUE  |
| Xanthomonadaceae           |    | 16  | 0.08703035 | 0.09431779 | FALSE | TRUE  |
| Rhizobiaceae               |    | 1   | 0.08088047 | 0.16039007 | FALSE | TRUE  |
| Intrasporangiaceae         |    | 91  | 0.07681519 | 0.08921872 | FALSE | TRUE  |
| Sphingobacteriaceae        | NA |     | 0.06792159 | 0.08320344 | FALSE | TRUE  |
| Thermoanaerobaculaceae     |    | 11  | 0.05084146 | 0.10051362 | FALSE | TRUE  |
| Opiritaceae                | NA |     | 0.01157036 | 0.0346631  | FALSE | TRUE  |
| Diplorickettsiaceae        |    | 2   | 0.00896882 | 0.03285347 | FALSE | TRUE  |
| Blastocatellaceae          | NA |     | 0          | 0.63004088 | FALSE | TRUE  |
| Microscillaceae            | NA |     | 0          | 0.35296219 | FALSE | TRUE  |
| Acetobacteraceae           | NA |     | 0          | 0.22778964 | FALSE | TRUE  |
| Birni41                    | NA |     | 0          | 0.08574337 | FALSE | TRUE  |
| Vermiphilaceae             | NA |     | 0          | 0.08323864 | FALSE | TRUE  |
| Burkholderiaceae           |    | 31  | 0          | 0.06809019 | FALSE | TRUE  |
| Vicinamibacteraceae        |    | 20  | 0          | 0.0513239  | FALSE | TRUE  |
| Frankiaceae                |    | 2   | 0          | 0.03337879 | FALSE | TRUE  |
| Microbacteriaceae          |    | 42  | 0          | 0.02255735 | FALSE | TRUE  |
| Solirubrobacteraceae       |    | 2   | 0          | 0.02232189 | FALSE | TRUE  |
| Devosiaceae                |    | 3   | 0          | 0.02229932 | FALSE | TRUE  |
| Ktedonobacteraceae         |    | 20  | 0          | 0.01184748 | FALSE | TRUE  |
| Rhizobiales Incertae Sedis | NA | NA  | NA         | FALSE      | TRUE  | TRUE  |
| X67-14                     | NA | NA  | NA         | FALSE      | TRUE  | FALSE |
| TRA3-20                    | NA | NA  | NA         | FALSE      | TRUE  | TRUE  |
| WD2101 soil group          | NA | NA  | NA         | FALSE      | TRUE  | TRUE  |
| JG30-KF-AS9                | NA | NA  | NA         | FALSE      | TRUE  | TRUE  |
| Beijerinckiaceae           | NA | NA  | NA         | FALSE      | TRUE  | TRUE  |
| env.OPS 17                 | NA | NA  | NA         | FALSE      | TRUE  | FALSE |
| Azospirillaceae            |    | 1   | 0.53923556 | 0.15319359 | FALSE | TRUE  |
| Methylophilaceae           | NA |     | 0.39228257 | 0.13234329 | FALSE | TRUE  |
| Pseudonocardiaceae         |    | 3   | 0.34591637 | 0.14266118 | FALSE | TRUE  |
| Isosphaeraceae             |    | 24  | 0.2535165  | 0.13616372 | FALSE | TRUE  |
| Paenibacillaceae           |    | 11  | 0.23699145 | 0.13424919 | FALSE | TRUE  |
| Clostridiaceae             |    | 309 | 0.18235269 | 0.12480892 | FALSE | TRUE  |
| Kineosporiaceae            |    | 64  | 0.17626353 | 0.12688325 | FALSE | TRUE  |

|                                |    |     |            |            |       |      |       |
|--------------------------------|----|-----|------------|------------|-------|------|-------|
| Flavobacteriaceae              |    | 211 | 0.1756527  | 0.12278504 | FALSE | TRUE | FALSE |
| lamiaceae                      |    | 25  | 0.138249   | 0.11405764 | FALSE | TRUE | FALSE |
| Geminococcaceae                |    | 50  | 0.12800102 | 0.11102073 | FALSE | TRUE | TRUE  |
| Labraceae                      |    | 7   | 0.11543509 | 0.13795443 | FALSE | TRUE | TRUE  |
| Chthonomonadaceae              |    | 33  | 0.06042788 | 0.08631568 | FALSE | TRUE | FALSE |
| Phaselicystidaceae             | NA |     | 0.04328935 | 0.04395835 | FALSE | TRUE | TRUE  |
| cvE6                           |    | 14  | 0.01969061 | 0.06606464 | FALSE | TRUE | FALSE |
| Anaeromyxobacteraceae          | NA |     | 0.01845726 | 0.02758436 | FALSE | TRUE | TRUE  |
| Solimonadaceae                 |    | 25  | 0.01797846 | 0.04217796 | FALSE | TRUE | FALSE |
| Phycisphaeraceae               |    | 11  | 0.01003618 | 0.07399336 | FALSE | TRUE | FALSE |
| Nakamurellaceae                |    | 56  | 0.00733123 | 0.0313196  | FALSE | TRUE | TRUE  |
| Rubritaleaceae                 |    | 2   | 0.00299102 | 0.02880787 | FALSE | TRUE | FALSE |
| Spirochaetaceae                |    | 3   | 0.00111513 | 0.0238385  | FALSE | TRUE | FALSE |
| Alicyclobacillaceae            |    | 8   | 5.04E-05   | 0.03636558 | FALSE | TRUE | TRUE  |
| SM2D12                         |    | 60  | 0          | 0.21567637 | FALSE | TRUE | FALSE |
| Moraxellaceae                  |    | 2   | 0          | 0.07885071 | FALSE | TRUE | TRUE  |
| Rhodomicrobiaceae              |    | 11  | 0          | 0.07551665 | FALSE | TRUE | FALSE |
| A0839                          |    | 1   | 0          | 0.05401663 | FALSE | TRUE | FALSE |
| Planococcaceae                 |    | 1   | 0          | 0.04551408 | FALSE | TRUE | FALSE |
| Geodermatophilaceae            | NA |     | 0          | 0.03953639 | FALSE | TRUE | TRUE  |
| Hyphomonadaceae                |    | 6   | 0          | 0.02803625 | FALSE | TRUE | FALSE |
| Streptomycetaceae              |    | 11  | 0          | 0.0244267  | FALSE | TRUE | TRUE  |
| Geobacteraceae                 |    | 28  | 0          | 0.02304121 | FALSE | TRUE | TRUE  |
| Pseudomonadaceae               |    | 24  | 0          | 0.02231061 | FALSE | TRUE | TRUE  |
| URHD0088                       |    | 81  | -0.0028494 | 0.01910465 | FALSE | TRUE | FALSE |
| Abditibacteriaceae             |    | 87  | -0.005207  | 0.01375589 | FALSE | TRUE | FALSE |
| Ilumatobacteraceae             |    | 3   | -0.0054262 | 0.02290175 | FALSE | TRUE | FALSE |
| Verrucomicrobiaceae            |    | 1   | -1.8867917 | 79.8301507 | FALSE | TRUE | FALSE |
| Cellulomonadaceae              |    | 15  | -1.9632452 | 67.3985434 | FALSE | TRUE | TRUE  |
| Fibrobacteraceae               | NA |     | -2.4936366 | 137.92784  | FALSE | TRUE | FALSE |
| Thermoactinomycetaceae         |    | 23  | -2.5751422 | 150.57728  | FALSE | TRUE | FALSE |
| Peptostreptococcaceae          |    | 45  | -3.8013187 | 81.2594218 | FALSE | TRUE | FALSE |
| Parachlamydiaceae              |    | 14  | -4.6415211 | 71.2198938 | FALSE | TRUE | FALSE |
| Gemmataceae                    | NA | NA  | NA         | NA         | FALSE | TRUE | FALSE |
| Dongiaceae                     | NA | NA  | NA         | NA         | FALSE | TRUE | FALSE |
| CPla-3 termite group           | NA | NA  | NA         | NA         | FALSE | TRUE | FALSE |
| Acidobacteriaceae (Subgroup 1) | NA | NA  | NA         | NA         | FALSE | TRUE | TRUE  |
| KF-JG30-B3                     | NA | NA  | NA         | NA         | FALSE | TRUE | FALSE |
| X37-13                         | NA | NA  | NA         | NA         | FALSE | TRUE | FALSE |
| NS11-12 marine group           | NA | NA  | NA         | NA         | FALSE | TRUE | FALSE |

|                       |    |     |            |            |       |       |       |
|-----------------------|----|-----|------------|------------|-------|-------|-------|
| AKYH767               | NA | NA  | NA         | FALSE      | TRUE  | TRUE  |       |
| Nostocaceae           | NA | NA  | NA         | FALSE      | TRUE  | FALSE |       |
| Caldilineaceae        |    | 88  | 0.76067873 | 0.15879238 | FALSE | FALSE | FALSE |
| Holophagaceae         |    | 271 | 0.65671928 | 0.15669245 | FALSE | FALSE | FALSE |
| Gallionellaceae       |    | 339 | 0.65416872 | 0.15683858 | FALSE | FALSE | FALSE |
| Dethiobacteraceae     | NA |     | 0.62208092 | 0.1131101  | FALSE | FALSE | FALSE |
| Amoebophilaceae       |    | 243 | 0.55321342 | 0.15365691 | FALSE | FALSE | FALSE |
| Coriobacteriaceae     |    | 483 | 0.48429688 | 0.15094295 | FALSE | FALSE | FALSE |
| Proteiniboraceae      |    | 209 | 0.43875513 | 0.1493015  | FALSE | FALSE | FALSE |
| Aerococcaceae         |    | 231 | 0.42740944 | 0.1488965  | FALSE | FALSE | FALSE |
| Sanguibacteraceae     |    | 470 | 0.37437605 | 0.14575336 | FALSE | FALSE | FALSE |
| Wohlfahrtiimonadaceae |    | 397 | 0.35941743 | 0.14514329 | FALSE | FALSE | FALSE |
| Prevotellaceae        |    | 69  | 0.32828338 | 0.14307546 | FALSE | FALSE | FALSE |
| Sporichthyaceae       |    | 197 | 0.28849102 | 0.14004792 | FALSE | FALSE | FALSE |
| Alcaligenaceae        |    | 368 | 0.28154792 | 0.13934373 | FALSE | FALSE | FALSE |
| Defluviococcaceae     |    | 315 | 0.2798717  | 0.13911257 | FALSE | FALSE | FALSE |
| Leptospiraceae        |    | 229 | 0.21808269 | 0.13091858 | FALSE | FALSE | FALSE |
| Cyclobacteriaceae     |    | 521 | 0.20954394 | 0.13018992 | FALSE | FALSE | FALSE |
| Obscuribacteraceae    |    | 219 | 0.18240802 | 0.12479559 | FALSE | FALSE | FALSE |
| Spirosomaceae         |    | 411 | 0.17824146 | 0.12530481 | FALSE | FALSE | FALSE |
| Erysipelotrichaceae   |    | 218 | 0.17748616 | 0.1232979  | FALSE | FALSE | FALSE |
| Brevibacillaceae      |    | 162 | 0.17234433 | 0.12269324 | FALSE | FALSE | FALSE |
| Omnitrophaceae        |    | 1   | 0.17212481 | 0.12300393 | FALSE | FALSE | FALSE |
| Paludibacteraceae     |    | 221 | 0.16980054 | 0.1239147  | FALSE | FALSE | FALSE |
| Akkermansiaceae       | NA |     | 0.16815901 | 0.12097812 | FALSE | FALSE | FALSE |
| Cryomorphaceae        | NA |     | 0.16815901 | 0.12097812 | FALSE | FALSE | FALSE |
| Bacteroidaceae        |    | 95  | 0.15706174 | 0.11871881 | FALSE | FALSE | FALSE |
| Leptotrichiaceae      |    | 411 | 0.14468155 | 0.11591839 | FALSE | FALSE | FALSE |
| Cellvibrionaceae      |    | 23  | 0.13897261 | 0.11354993 | FALSE | FALSE | FALSE |
| Morganellaceae        | NA |     | 0.13096179 | 0.11149072 | FALSE | FALSE | FALSE |
| Hydrogenophilaceae    |    | 418 | 0.12965953 | 0.11115586 | FALSE | FALSE | FALSE |
| Terrimicrobiaceae     |    | 220 | 0.12007945 | 0.10722102 | FALSE | FALSE | FALSE |
| WX65                  |    | 60  | 0.11502143 | 0.10310093 | FALSE | FALSE | FALSE |
| Legionellaceae        |    | 154 | 0.11389058 | 0.10533955 | FALSE | FALSE | FALSE |
| Sumerlaeaceae         |    | 158 | 0.10742225 | 0.10392821 | FALSE | FALSE | FALSE |
| Sandaracinaceae       |    | 243 | 0.10576886 | 0.10177004 | FALSE | FALSE | FALSE |
| Nocardiaceae          |    | 35  | 0.10035008 | 0.09940176 | FALSE | FALSE | FALSE |
| Halomonadaceae        |    | 200 | 0.08853067 | 0.15415457 | FALSE | FALSE | FALSE |
| Anaerolineaceae       |    | 360 | 0.08144329 | 0.09026023 | FALSE | FALSE | FALSE |
| Thermaceae            |    | 205 | 0.07620147 | 0.14974382 | FALSE | FALSE | FALSE |

|                      |     |            |            |       |       |       |
|----------------------|-----|------------|------------|-------|-------|-------|
| Cytophagaceae        | 19  | 0.07041701 | 0.08371033 | FALSE | FALSE | FALSE |
| Magnetospirillaceae  | 308 | 0.06858003 | 0.09539432 | FALSE | FALSE | FALSE |
| Arcobacteraceae      | 217 | 0.06132036 | 0.07754565 | FALSE | FALSE | FALSE |
| Ruminococcaceae      | 4   | 0.05736914 | 0.07498634 | FALSE | FALSE | FALSE |
| Methyloigellaceae    | 99  | 0.05513853 | 0.07494552 | FALSE | FALSE | FALSE |
| Bacteriovoracaceae   | 58  | 0.04963317 | 0.07027572 | FALSE | FALSE | FALSE |
| Neisseriaceae        | 117 | 0.04484694 | 0.06957396 | FALSE | FALSE | FALSE |
| AKIW781              | 65  | 0.04173726 | 0.06354817 | FALSE | FALSE | FALSE |
| Rubinisphaeraceae    | 20  | 0.04112421 | 0.063642   | FALSE | FALSE | FALSE |
| Gemellaceae          | 250 | 0.03846134 | 0.06204274 | FALSE | FALSE | FALSE |
| Trueperaceae         | 250 | 0.03685005 | 0.06030392 | FALSE | FALSE | FALSE |
| Saccharimonadaceae   | 250 | 0.03685005 | 0.06030392 | FALSE | FALSE | FALSE |
| Oxobacteraceae       | 250 | 0.03685005 | 0.06030392 | FALSE | FALSE | FALSE |
| Oligosphaeraceae     | 284 | 0.03302006 | 0.05765196 | FALSE | FALSE | FALSE |
| Thermomonosporaceae  | 119 | 0.0249567  | 0.0495929  | FALSE | FALSE | FALSE |
| Rhodobacteraceae     | 22  | 0.02005565 | 0.04473901 | FALSE | FALSE | FALSE |
| Pasteurellaceae      | 302 | 0.01828478 | 0.04338533 | FALSE | FALSE | FALSE |
| Lachnospiraceae      | 104 | 0.01781246 | 0.05359081 | FALSE | FALSE | FALSE |
| Selenomonadaceae     | 302 | 0.01553585 | 0.04045114 | FALSE | FALSE | FALSE |
| DEV007               | 369 | 0.01132861 | 0.0358079  | FALSE | FALSE | FALSE |
| Alteromonadaceae     | 64  | 0.0105716  | 0.04212393 | FALSE | FALSE | FALSE |
| Schlesneriaceae      | 26  | 0.01026488 | 0.03455747 | FALSE | FALSE | FALSE |
| Saprospiraceae       | 199 | 0.00747033 | 0.03160117 | FALSE | FALSE | FALSE |
| Actinospicaceae      | 327 | 0.00683266 | 0.03874494 | FALSE | FALSE | FALSE |
| UBA12409             | 56  | 0.00375163 | 0.02858096 | FALSE | FALSE | FALSE |
| Bifidobacteriaceae   | 267 | 0.00373363 | 0.02719774 | FALSE | FALSE | FALSE |
| Sulfurimonadaceae    | 222 | 0.00269238 | 0.02610891 | FALSE | FALSE | FALSE |
| Tannerellaceae       | 268 | 0.0022849  | 0.02572081 | FALSE | FALSE | FALSE |
| Thermomicrobiaceae   | 221 | 0.00193853 | 0.02508234 | FALSE | FALSE | FALSE |
| Vampirovibrionaceae  | 299 | 0.00166096 | 0.02470817 | FALSE | FALSE | FALSE |
| Sulfurospirillaceae  | 512 | 0          | 1.41266348 | FALSE | FALSE | FALSE |
| Sporomusaceae        | 55  | 0          | 0.53576159 | FALSE | FALSE | FALSE |
| Rhodocyclaceae       | 339 | 0          | 0.46270774 | FALSE | FALSE | FALSE |
| Veillonellaceae      | NA  | 0          | 0.28029337 | FALSE | FALSE | FALSE |
| BSV26                | 26  | 0          | 0.1916218  | FALSE | FALSE | FALSE |
| Micropepsaceae       | 22  | 0          | 0.17047885 | FALSE | FALSE | FALSE |
| Dysgonomonadaceae    | 320 | 0          | 0.10911275 | FALSE | FALSE | FALSE |
| Eggerthellaceae      | NA  | 0          | 0.10837229 | FALSE | FALSE | FALSE |
| Leuconostocaceae     | NA  | 0          | 0.10837229 | FALSE | FALSE | FALSE |
| Streptosporangiaceae | 267 | 0          | 0.09141077 | FALSE | FALSE | FALSE |

|                           |    |     |            |            |       |       |       |
|---------------------------|----|-----|------------|------------|-------|-------|-------|
| Crocinitomicaceae         |    | 7   | 0          | 0.08330471 | FALSE | FALSE | FALSE |
| Chloroflexaceae           |    | 73  | 0          | 0.06733627 | FALSE | FALSE | FALSE |
| Rhodothermaceae           | NA |     | 0          | 0.05466097 | FALSE | FALSE | FALSE |
| LWQ8                      |    | 240 | 0          | 0.03622526 | FALSE | FALSE | FALSE |
| Fimbriimonadaceae         |    | 415 | 0          | 0.03347359 | FALSE | FALSE | FALSE |
| Acidiferrobacteraceae     |    | 67  | 0          | 0.02598065 | FALSE | FALSE | FALSE |
| Silvanigrellaceae         |    | 5   | 0          | 0.02305175 | FALSE | FALSE | FALSE |
| Caloramatoraceae          |    | 416 | 0          | 0.02255735 | FALSE | FALSE | FALSE |
| Chromobacteriaceae        |    | 92  | 0          | 0.02255735 | FALSE | FALSE | FALSE |
| Haliaceae                 |    | 272 | 0          | 0.02226287 | FALSE | FALSE | FALSE |
| Weeksellaceae             |    | 26  | 0          | 0.02212612 | FALSE | FALSE | FALSE |
| Longimicrobiaceae         |    | 57  | 0          | 0.0220318  | FALSE | FALSE | FALSE |
| Simkaniaceae              |    | 5   | 0          | 0.02027306 | FALSE | FALSE | FALSE |
| Carnobacteriaceae         |    | 538 | 0          | 0.0185994  | FALSE | FALSE | FALSE |
| Blattabacteriaceae        | NA |     | 0          | 0.0148498  | FALSE | FALSE | FALSE |
| Nannocystaceae            |    | 3   | 0          | 0.01281651 | FALSE | FALSE | FALSE |
| Hymenobacteraceae         |    | 96  | 0          | 0.01103008 | FALSE | FALSE | FALSE |
| Enterobacteriaceae        |    | 281 | -0.001057  | 0.02115837 | FALSE | FALSE | FALSE |
| Desulfovibrionaceae       |    | 419 | -0.0016626 | 0.02045536 | FALSE | FALSE | FALSE |
| Staphylococcaceae         |    | 22  | -0.0459734 | 0.15984776 | FALSE | FALSE | FALSE |
| S32                       |    | 418 | -0.17952   | 4.0598948  | FALSE | FALSE | FALSE |
| Desulfohalobaceae         |    | 408 | -0.9083787 | 105.776702 | FALSE | FALSE | FALSE |
| Barnesiellaceae           |    | 408 | -0.9083787 | 105.776702 | FALSE | FALSE | FALSE |
| Psychromonadaceae         |    | 278 | -1.7288246 | 91.5697065 | FALSE | FALSE | FALSE |
| Vulgatibacteraceae        |    | 84  | -1.7783036 | 1.20791225 | FALSE | FALSE | FALSE |
| Kaistiaceae               |    | 324 | -1.8310767 | 83.8592642 | FALSE | FALSE | FALSE |
| Bogoriellaceae            |    | 280 | -1.8538133 | 80.2846575 | FALSE | FALSE | FALSE |
| Idiomarinaceae            |    | 169 | -2.4796445 | 131.65033  | FALSE | FALSE | FALSE |
| Microtrichaceae           |    | 85  | -2.9002719 | 609.137226 | FALSE | FALSE | FALSE |
| Paracaedibacteraceae      |    | 13  | -2.9232174 | 367.275503 | FALSE | FALSE | FALSE |
| Prolixibacteraceae        |    | 13  | -3.0826234 | 175.050572 | FALSE | FALSE | FALSE |
| Woeseiaceae               |    | 73  | -3.1008482 | 168.423304 | FALSE | FALSE | FALSE |
| Demequinaceae             | NA |     | -3.2695624 | 121.800573 | FALSE | FALSE | FALSE |
| Caldalkalibacillaceae     |    | 20  | -3.3221406 | 114.828941 | FALSE | FALSE | FALSE |
| Halanaerobiaceae          |    | 75  | -3.5777428 | 90.7245235 | FALSE | FALSE | FALSE |
| Acholeplasmataceae        |    | 111 | -3.6316076 | 87.8364168 | FALSE | FALSE | FALSE |
| Erysipelatoclostridiaceae |    | 96  | -3.7160219 | 84.1578126 | FALSE | FALSE | FALSE |
| Alcanivoracaceae1         |    | 70  | -3.7730001 | 82.1393022 | FALSE | FALSE | FALSE |
| Aneurinibacillaceae       |    | 84  | -3.8207342 | 80.6500404 | FALSE | FALSE | FALSE |
| Streptococcaceae          |    | 56  | -4.0198736 | 76.1528722 | FALSE | FALSE | FALSE |

|                                       |    |    |            |            |       |       |       |
|---------------------------------------|----|----|------------|------------|-------|-------|-------|
| Deinococcaceae                        |    | 60 | -4.0612542 | 75.4414778 | FALSE | FALSE | FALSE |
| Porphyromonadaceae                    |    | 23 | -7.0024208 | 86.3138376 | FALSE | FALSE | FALSE |
| Corynebacteriaceae                    |    | 42 | -14.232355 | 203.724539 | FALSE | FALSE | FALSE |
| KD3-93                                | NA | NA | NA         | NA         | FALSE | FALSE | FALSE |
| Lactobacillaceae                      | NA | NA | NA         | NA         | FALSE | FALSE | FALSE |
| CWT CU03-E12                          | NA | NA | NA         | NA         | FALSE | FALSE | FALSE |
| Desulfotobacteriaceae                 | NA | NA | NA         | NA         | FALSE | FALSE | FALSE |
| JG30-KF-CM45                          | NA | NA | NA         | NA         | FALSE | FALSE | FALSE |
| Christensenellaceae                   | NA | NA | NA         | NA         | FALSE | FALSE | FALSE |
| Unknown Family                        | NA | NA | NA         | NA         | FALSE | FALSE | FALSE |
| Actinomycetaceae                      | NA | NA | NA         | NA         | FALSE | FALSE | FALSE |
| Amb-16S-1034                          | NA | NA | NA         | NA         | FALSE | FALSE | FALSE |
| bac2nit3                              | NA | NA | NA         | NA         | FALSE | FALSE | FALSE |
| 27F-1492R                             | NA | NA | NA         | NA         | FALSE | FALSE | FALSE |
| Caedibacteraceae                      | NA | NA | NA         | NA         | FALSE | FALSE | FALSE |
| type III                              | NA | NA | NA         | NA         | FALSE | FALSE | FALSE |
| Symbiobacteraceae                     | NA | NA | NA         | NA         | FALSE | FALSE | FALSE |
| Bacteroidetes vadinHA17               | NA | NA | NA         | NA         | FALSE | FALSE | FALSE |
| Shewanellaceae                        | NA | NA | NA         | NA         | FALSE | FALSE | FALSE |
| Parvibaculaceae                       | NA | NA | NA         | NA         | FALSE | FALSE | FALSE |
| LiUU-11-161                           | NA | NA | NA         | NA         | FALSE | FALSE | FALSE |
| Coxiellaceae                          | NA | NA | NA         | NA         | FALSE | FALSE | FALSE |
| Catenulisporaceae                     | NA | NA | NA         | NA         | FALSE | FALSE | FALSE |
| Inquilinaceae                         | NA | NA | NA         | NA         | FALSE | FALSE | FALSE |
| UCG-010                               | NA | NA | NA         | NA         | FALSE | FALSE | FALSE |
| Rubrobacteriaceae                     | NA | NA | NA         | NA         | FALSE | FALSE | FALSE |
| [Eubacterium] coprostanoligenes group | NA | NA | NA         | NA         | FALSE | FALSE | FALSE |
| Phormidiaceae                         | NA | NA | NA         | NA         | FALSE | FALSE | FALSE |
| AB1                                   | NA | NA | NA         | NA         | FALSE | FALSE | FALSE |
| Streptosporangiales Incertae Sedis    | NA | NA | NA         | NA         | FALSE | FALSE | FALSE |
| Pseudanabaenaceae                     | NA | NA | NA         | NA         | FALSE | FALSE | FALSE |
| Dermabacteraceae                      | NA | NA | NA         | NA         | FALSE | FALSE | FALSE |
| Caldicoprobacteraceae                 | NA | NA | NA         | NA         | FALSE | FALSE | FALSE |
| NS9 marine group                      | NA | NA | NA         | NA         | FALSE | FALSE | FALSE |
| Puniceicoccaceae                      | NA | NA | NA         | NA         | FALSE | FALSE | FALSE |
| Rickettsiaceae                        | NA | NA | NA         | NA         | FALSE | FALSE | FALSE |
| Desulfitobacteraceae                  | NA | NA | NA         | NA         | FALSE | FALSE | FALSE |
| Chitinibacteraceae                    | NA | NA | NA         | NA         | FALSE | FALSE | FALSE |
| Desulfallas-Sporotomaculum            | NA | NA | NA         | NA         | FALSE | FALSE | FALSE |
| Syntrophomonadaceae                   | NA | NA | NA         | NA         | FALSE | FALSE | FALSE |

832 **Supplemental Table 2:**

833 **Bacterial Family Association Data:** Data represents the number of significant SNPs associated with each family,  
 834 the heritability estimate and standard error, and an indicator for their presence above the occupancy thresholds 0.9  
 835 and 0.1 for the full ASV dataset and 0.1 for the outlier ASV dataset.  
 836

| GO term    | Ontology | Description                                                                        | Number in input list | Number in BG/Ref | p-value | FDR  | Family             |
|------------|----------|------------------------------------------------------------------------------------|----------------------|------------------|---------|------|--------------------|
| GO:0016887 | F        | ATPase activity                                                                    | 15                   | 698              | 0.0044  | 0.04 | Xanthobacteraceae  |
| GO:0016817 | F        | hydrolase activity, acting on acid anhydrides                                      | 26                   | 1415             | 0.0019  | 0.02 | Xanthobacteraceae  |
| GO:0016818 | F        | hydrolase activity, acting on acid anhydrides, in phosphorus-containing anhydrides | 26                   | 1391             | 0.0015  | 0.02 | Xanthobacteraceae  |
| GO:0016874 | F        | ligase activity                                                                    | 16                   | 600              | 0.0003  | 0.02 | Xanthobacteraceae  |
| GO:0003774 | F        | motor activity                                                                     | 6                    | 152              | 0.0045  | 0.04 | Xanthobacteraceae  |
| GO:0017111 | F        | nucleoside-triphosphatase activity                                                 | 26                   | 1324             | 0.0007  | 0.02 | Xanthobacteraceae  |
| GO:0016462 | F        | pyrophosphatase activity                                                           | 26                   | 1357             | 0.0011  | 0.02 | Xanthobacteraceae  |
| GO:0019787 | F        | small conjugating protein ligase activity                                          | 6                    | 130              | 0.0021  | 0.02 | Xanthobacteraceae  |
| GO:0004842 | F        | ubiquitin-protein ligase activity                                                  | 6                    | 130              | 0.0021  | 0.02 | Xanthobacteraceae  |
| GO:0005623 | C        | cell                                                                               | 103                  | 8213             | 0.0085  | 0.03 | Sphingomonadaceae  |
| GO:0004464 | C        | cell part                                                                          | 103                  | 8213             | 0.0085  | 0.03 | Sphingomonadaceae  |
| GO:0016021 | C        | integral to membrane                                                               | 27                   | 1616             | 0.0083  | 0.03 | Sphingomonadaceae  |
| GO:0031224 | C        | intrinsic to membrane                                                              | 27                   | 1651             | 0.011   | 0.03 | Sphingomonadaceae  |
| GO:0016020 | C        | membrane                                                                           | 58                   | 4123             | 0.0063  | 0.01 | Sphingomonadaceae  |
| GO:0004425 | C        | membrane part                                                                      | 37                   | 2042             | 0.0005  | 0.02 | Sphingomonadaceae  |
| GO:0004222 | F        | metalloendopeptidase activity                                                      | 6                    | 100              | 0.0007  | 0.02 | Sphingomonadaceae  |
| GO:0008237 | F        | metallopeptidase activity                                                          | 8                    | 119              | 0.0000  | 0.00 | Sphingomonadaceae  |
| GO:0007072 | P        | cellular macromolecule localization                                                | 10                   | 311              | 0.0016  | 0.02 | Sphingomonadaceae  |
| GO:0004423 | P        | cellular metabolic process                                                         | 142                  | 11155            | 0.0006  | 0.01 | Sphingomonadaceae  |
| GO:0009987 | P        | cellular process                                                                   | 190                  | 14248            | 0.0000  | 0.00 | Sphingomonadaceae  |
| GO:0003461 | P        | cellular protein localization                                                      | 10                   | 311              | 0.0016  | 0.02 | Sphingomonadaceae  |
| GO:0009719 | P        | response to endogenous stimulus                                                    | 5                    | 48               | 0.0001  | 0.00 | Sphingomonadaceae  |
| GO:0009725 | P        | response to hormone stimulus                                                       | 5                    | 48               | 0.0001  | 0.00 | Sphingomonadaceae  |
| GO:0010033 | P        | response to organic substance                                                      | 5                    | 48               | 0.0001  | 0.00 | Sphingomonadaceae  |
| GO:0008026 | F        | ATP-dependent helicase activity                                                    | 5                    | 232              | 0.0084  | 0.04 | Micromonosporaceae |
| GO:0016887 | F        | ATPase activity                                                                    | 12                   | 698              | 0.0004  | 0.00 | Micromonosporaceae |
| GO:0004262 | F        | ATPase activity, coupled                                                           | 9                    | 422              | 0.0004  | 0.00 | Micromonosporaceae |
| GO:0004386 | F        | helicase activity                                                                  | 8                    | 477              | 0.0042  | 0.03 | Micromonosporaceae |
| GO:0016787 | F        | hydrolase activity                                                                 | 43                   | 5652             | 0.0075  | 0.04 | Micromonosporaceae |
| GO:0016817 | F        | hydrolase activity, acting on acid anhydrides                                      | 19                   | 1415             | 0.0002  | 0.00 | Micromonosporaceae |
| GO:0016818 | F        | hydrolase activity, acting on acid anhydrides, in phosphorus-containing anhydrides | 19                   | 1391             | 0.0001  | 0.00 | Micromonosporaceae |

|            |   |                                           |    |      |        |      |                    |
|------------|---|-------------------------------------------|----|------|--------|------|--------------------|
| GO:0017111 | F | nucleoside-triphosphatase activity        | 19 | 1324 | 0.0000 | 0.00 | Micromonosporaceae |
| GO:0070035 | F | purine NTP-dependent helicase activity    | 5  | 232  | 0.0084 | 0.04 | Micromonosporaceae |
| GO:0016462 | F | pyrophosphatase activity                  | 19 | 1357 | 0.0001 | 0.00 | Micromonosporaceae |
| GO:0070242 | P | intracellular signaling cascade           | 7  | 291  | 0.001  | 0.04 | Micromonosporaceae |
| GO:0070264 | P | small GTPase mediated signal transduction | 7  | 289  | 0.001  | 0.04 | Micromonosporaceae |

837 **Supplemental Table 3:**

838 **GO Term Data:** Data represents the Ontologies, Descriptions, Number of genes in the input list and reference  
 839 genome, p-value, and FDR for GO terms associated with Xanthobacteraceae, Sphingomonadaceae, and  
 840 Micromonosporaceae abundances.

841
